# Supplementary material for: Identification of Cross-Talk and Pyroptosis-Related Genes Linking Periodontitis and Rheumatoid Arthritis Revealed by Transcriptomic Analysis
Source: Dis Markers. 2021 Dec 29;2021:5074305. doi: 10.1155/2021/5074305 (PMC8731299; doi:10.1155/2021/5074305)
Supplement: Supplementary Materials — Table S1: the detailed clinical sample information of each dataset analyzed in the current research. [file 5074305.f1.xlsx]

## Sheet: RA-GSE55235
!Sample_geo_accession	!Sample_title	!Sample_source_name_ch1	disease state	tissue
GSM1332201	Synovial tisssue from healthy joint 1 (ND_1)	synovial tissue from healthy joint	healthy control	synovial tissue isolated from joint
GSM1332202	Synovial tisssue from healthy joint 2 (ND_2)	synovial tissue from healthy joint	healthy control	synovial tissue isolated from joint
GSM1332203	Synovial tisssue from healthy joint 3 (ND_3)	synovial tissue from healthy joint	healthy control	synovial tissue isolated from joint
GSM1332204	Synovial tisssue from healthy joint 4 (ND_4)	synovial tissue from healthy joint	healthy control	synovial tissue isolated from joint
GSM1332205	Synovial tisssue from healthy joint 5 (ND_5)	synovial tissue from healthy joint	healthy control	synovial tissue isolated from joint
GSM1332206	Synovial tisssue from healthy joint 6 (ND_6)	synovial tissue from healthy joint	healthy control	synovial tissue isolated from joint
GSM1332207	Synovial tisssue from healthy joint 7 (ND_7)	synovial tissue from healthy joint	healthy control	synovial tissue isolated from joint
GSM1332208	Synovial tisssue from healthy joint 8 (ND_8)	synovial tissue from healthy joint	healthy control	synovial tissue isolated from joint
GSM1332209	Synovial tisssue from healthy joint 9 (ND_9)	synovial tissue from healthy joint	healthy control	synovial tissue isolated from joint
GSM1332210	Synovial tisssue from healthy joint 10 (ND_10)	synovial tissue from healthy joint	healthy control	synovial tissue isolated from joint
GSM1332221	Synovial tissue from rheumatoid arthritis joint 1 (RA_1)	synovial tissue from rheumatoid arthritis joint	rheumatoid arthritis	synovial tissue isolated from joint
GSM1332222	Synovial tissue from rheumatoid arthritis joint 2 (RA_2)	synovial tissue from rheumatoid arthritis joint	rheumatoid arthritis	synovial tissue isolated from joint
GSM1332223	Synovial tissue from rheumatoid arthritis joint 3 (RA_3)	synovial tissue from rheumatoid arthritis joint	rheumatoid arthritis	synovial tissue isolated from joint
GSM1332224	Synovial tissue from rheumatoid arthritis joint 4 (RA_4)	synovial tissue from rheumatoid arthritis joint	rheumatoid arthritis	synovial tissue isolated from joint
GSM1332225	Synovial tissue from rheumatoid arthritis joint 5 (RA_5)	synovial tissue from rheumatoid arthritis joint	rheumatoid arthritis	synovial tissue isolated from joint
GSM1332226	Synovial tissue from rheumatoid arthritis joint 6 (RA_6)	synovial tissue from rheumatoid arthritis joint	rheumatoid arthritis	synovial tissue isolated from joint
GSM1332227	Synovial tissue from rheumatoid arthritis joint 7 (RA_7)	synovial tissue from rheumatoid arthritis joint	rheumatoid arthritis	synovial tissue isolated from joint
GSM1332228	Synovial tissue from rheumatoid arthritis joint 8 (RA_8)	synovial tissue from rheumatoid arthritis joint	rheumatoid arthritis	synovial tissue isolated from joint
GSM1332229	Synovial tissue from rheumatoid arthritis joint 9 (RA_9)	synovial tissue from rheumatoid arthritis joint	rheumatoid arthritis	synovial tissue isolated from joint
GSM1332230	Synovial tissue from rheumatoid arthritis joint 10 (RA_10)	synovial tissue from rheumatoid arthritis joint	rheumatoid arthritis	synovial tissue isolated from joint

## Sheet: RA-GSE55457
!Sample_geo_accession	!Sample_title	!Sample_source_name_ch1	gender	age	clinical status
GSM1337304	Normal, synovial membrane patient EB_125 (U133A)	synovial membrane patient EB_125 (normal controls)	male	61	normal control
GSM1337305	Normal, synovial membrane patient EB_184 (U133A)	synovial membrane patient EB_184 (normal controls)	male	64	normal control
GSM1337306	Normal, synovial membrane patient EB_188 (U133A)	synovial membrane patient EB_188 (normal controls)	female	78	normal control
GSM1337307	Normal, synovial membrane patient EB_228 (U133A)	synovial membrane patient EB_228 (normal controls)	male	65	normal control
GSM1337308	Normal, synovial membrane patient J_19 (U133A)	synovial membrane patient J_19 (normal controls)	male	53	normal control
GSM1337309	Normal, synovial membrane patient NST_1 (U133A)	synovial membrane patient NST_1 (normal controls)	male	68	normal control
GSM1337310	Normal, synovial membrane patient J_2 (U133A)	synovial membrane patient J_2 (normal controls)	female	29	normal control
GSM1337311	Normal, synovial membrane patient J_6 (U133A)	synovial membrane patient J_6 (normal controls)	male	17	normal control
GSM1337312	Normal, synovial membrane patient J_7 (U133A)	synovial membrane patient J_7 (normal controls)	male	39	normal control
GSM1337313	Normal, synovial membrane patient J_12 (U133A)	synovial membrane patient J_12 (normal controls)	male	36	normal control
GSM1337314	Rheumatoid arthritis, synovial membrane patient EB_20 (U133A)	synovial membrane patient EB_20 (rheumatoid arthritis)	male	75	rheumatoid arthritis
GSM1337315	Rheumatoid arthritis, synovial membrane patient EB_27 (U133A)	synovial membrane patient EB_27 (rheumatoid arthritis)	female	79	rheumatoid arthritis
GSM1337316	Rheumatoid arthritis, synovial membrane patient EB_30 (U133A)	synovial membrane patient EB_30 (rheumatoid arthritis)	female	63	rheumatoid arthritis
GSM1337317	Rheumatoid arthritis, synovial membrane patient EB_35 (U133A)	synovial membrane patient EB_35 (rheumatoid arthritis)	female	66	rheumatoid arthritis
GSM1337318	Rheumatoid arthritis, synovial membrane patient EB_40 (U133A)	synovial membrane patient EB_40 (rheumatoid arthritis)	female	64	rheumatoid arthritis
GSM1337319	Rheumatoid arthritis, synovial membrane patient EB_41 (U133A)	synovial membrane patient EB_41 (rheumatoid arthritis)	female	63	rheumatoid arthritis
GSM1337320	Rheumatoid arthritis, synovial membrane patient EB_56 (U133A)	synovial membrane patient EB_56 (rheumatoid arthritis)	female	46	rheumatoid arthritis
GSM1337321	Rheumatoid arthritis, synovial membrane patient EB_74 (U133A)	synovial membrane patient EB_74 (rheumatoid arthritis)	female	71	rheumatoid arthritis
GSM1337322	Rheumatoid arthritis, synovial membrane patient EB_108 (U133A)	synovial membrane patient EB_108 (rheumatoid arthritis)	female	72	rheumatoid arthritis
GSM1337323	Rheumatoid arthritis, synovial membrane patient EB_109 (U133A)	synovial membrane patient EB_109 (rheumatoid arthritis)	female	2	rheumatoid arthritis
GSM1337324	Rheumatoid arthritis, synovial membrane patient EB_110 (U133A)	synovial membrane patient EB_110 (rheumatoid arthritis)	male	47	rheumatoid arthritis
GSM1337325	Rheumatoid arthritis, synovial membrane patient EB_124 (U133A)	synovial membrane patient EB_124 (rheumatoid arthritis)	male	59	rheumatoid arthritis
GSM1337326	Rheumatoid arthritis, synovial membrane patient EB_141 (U133A)	synovial membrane patient EB_141 (rheumatoid arthritis)	female	73	rheumatoid arthritis

## Sheet: RA-GSE77298
!Sample_geo_accession	!Sample_title	!Sample_source_name_ch1	!Sample_organism_ch1	disease state	tissue
GSM2048265	HC-1	HC, synovium	Homo sapiens	Healthy control	synovium
GSM2048266	HC-2	HC, synovium	Homo sapiens	Healthy control	synovium
GSM2048267	HC-3	HC, synovium	Homo sapiens	Healthy control	synovium
GSM2048268	HC-4	HC, synovium	Homo sapiens	Healthy control	synovium
GSM2048269	HC-5	HC, synovium	Homo sapiens	Healthy control	synovium
GSM2048270	HC-6	HC, synovium	Homo sapiens	Healthy control	synovium
GSM2048271	HC-7	HC, synovium	Homo sapiens	Healthy control	synovium
GSM2048272	RA-1	RA, synovium	Homo sapiens	Rheumatoid arthritis	synovium
GSM2048273	RA-2	RA, synovium	Homo sapiens	Rheumatoid arthritis	synovium
GSM2048274	RA-3	RA, synovium	Homo sapiens	Rheumatoid arthritis	synovium
GSM2048275	RA-4	RA, synovium	Homo sapiens	Rheumatoid arthritis	synovium
GSM2048276	RA-5	RA, synovium	Homo sapiens	Rheumatoid arthritis	synovium
GSM2048277	RA-6	RA, synovium	Homo sapiens	Rheumatoid arthritis	synovium
GSM2048278	RA-7	RA, synovium	Homo sapiens	Rheumatoid arthritis	synovium
GSM2048279	RA-8	RA, synovium	Homo sapiens	Rheumatoid arthritis	synovium
GSM2048280	RA-9	RA, synovium	Homo sapiens	Rheumatoid arthritis	synovium
GSM2048281	RA-10	RA, synovium	Homo sapiens	Rheumatoid arthritis	synovium
GSM2048282	RA-11	RA, synovium	Homo sapiens	Rheumatoid arthritis	synovium
GSM2048283	RA-12	RA, synovium	Homo sapiens	Rheumatoid arthritis	synovium
GSM2048284	RA-13	RA, synovium	Homo sapiens	Rheumatoid arthritis	synovium
GSM2048285	RA-14	RA, synovium	Homo sapiens	Rheumatoid arthritis	synovium
GSM2048286	RA-15	RA, synovium	Homo sapiens	Rheumatoid arthritis	synovium
GSM2048287	RA-16	RA, synovium	Homo sapiens	Rheumatoid arthritis	synovium

## Sheet: RA-GSE1919
!Sample_geo_accession	!Sample_title	!Sample_source_name_ch1	age	gender
GSM34379	ND_1	normal donor	69	female
GSM34383	ND_2	normal donor	58	male
GSM34385	ND_3	normal donor	32	female
GSM34388	ND_4	normal donor	46	male
GSM34391	ND_5	normal donor	58	male
GSM34398	RA_A	rheumatoid arthritis	45	female
GSM34399	RA_B	rheumatoid arthritis	51	male
GSM34400	RA_x	rheumatoid arthritis	44	female
GSM34401	RA_y	rheumatoid arthritis	49	female
GSM34402	RA_z	rheumatoid arthritis	63	male

## Sheet: PD-GSE16134
!Sample_geo_accession	!Sample_title	!Sample_source_name_ch1	gingival tissue phenotype	tissue	!Sample_treatment_protocol_ch1
GSM404005	Sample 1 from patient 1, Affected site	Patient 1 gingival tissue sample collected as Affected	Diseased (BoP + interproximal PPD of>3 mm + concomitant CAL of>2 mm)	Gingival	After collection gingival tissue specimens were thoroughly rinsed with sterile normal saline solution and transferred into Eppendorf tubes containing 5 volumes of a RNA stabilization reagent (RNAlater, Ambion, Austin, TX, USA). Specimens were stored in RNAlater overnight at 4.0 C and thereafter snap-frozen and stored in liquid nitrogen. All further processing occurred simultaneously for gingival …
GSM404006	Sample 2 from patient 1, Affected site	Patient 1 gingival tissue sample collected as Affected	Diseased (BoP + interproximal PPD of>3 mm + concomitant CAL of>2 mm)	Gingival	After collection gingival tissue specimens were thoroughly rinsed with sterile normal saline solution and transferred into Eppendorf tubes containing 5 volumes of a RNA stabilization reagent (RNAlater, Ambion, Austin, TX, USA). Specimens were stored in RNAlater overnight at 4.0 C and thereafter snap-frozen and stored in liquid nitrogen. All further processing occurred simultaneously for gingival …
GSM404007	Sample 4 from patient 1, Unaffected site	Patient 1 gingival tissue sample collected as Unaffected	Healthy (no BoP + PPD of<5 mm + CAL of<3 2 mm	Gingival	After collection gingival tissue specimens were thoroughly rinsed with sterile normal saline solution and transferred into Eppendorf tubes containing 5 volumes of a RNA stabilization reagent (RNAlater, Ambion, Austin, TX, USA). Specimens were stored in RNAlater overnight at 4.0 C and thereafter snap-frozen and stored in liquid nitrogen. All further processing occurred simultaneously for gingival …
GSM404008	Sample 1 from patient 2, Affected site	Patient 2 gingival tissue sample collected as Affected	Diseased (BoP + interproximal PPD of>3 mm + concomitant CAL of>2 mm)	Gingival	After collection gingival tissue specimens were thoroughly rinsed with sterile normal saline solution and transferred into Eppendorf tubes containing 5 volumes of a RNA stabilization reagent (RNAlater, Ambion, Austin, TX, USA). Specimens were stored in RNAlater overnight at 4.0 C and thereafter snap-frozen and stored in liquid nitrogen. All further processing occurred simultaneously for gingival …
GSM404009	Sample 2 from patient 2, Affected site	Patient 2 gingival tissue sample collected as Affected	Diseased (BoP + interproximal PPD of>3 mm + concomitant CAL of>2 mm)	Gingival	After collection gingival tissue specimens were thoroughly rinsed with sterile normal saline solution and transferred into Eppendorf tubes containing 5 volumes of a RNA stabilization reagent (RNAlater, Ambion, Austin, TX, USA). Specimens were stored in RNAlater overnight at 4.0 C and thereafter snap-frozen and stored in liquid nitrogen. All further processing occurred simultaneously for gingival …
GSM404010	Sample 4 from patient 2, Unaffected site	Patient 2 gingival tissue sample collected as Unaffected	Healthy (no BoP + PPD of<5 mm + CAL of<3 2 mm	Gingival	After collection gingival tissue specimens were thoroughly rinsed with sterile normal saline solution and transferred into Eppendorf tubes containing 5 volumes of a RNA stabilization reagent (RNAlater, Ambion, Austin, TX, USA). Specimens were stored in RNAlater overnight at 4.0 C and thereafter snap-frozen and stored in liquid nitrogen. All further processing occurred simultaneously for gingival …
GSM404011	Sample 1 from patient 3, Affected site	Patient 3 gingival tissue sample collected as Affected	Diseased (BoP + interproximal PPD of>3 mm + concomitant CAL of>2 mm)	Gingival	After collection gingival tissue specimens were thoroughly rinsed with sterile normal saline solution and transferred into Eppendorf tubes containing 5 volumes of a RNA stabilization reagent (RNAlater, Ambion, Austin, TX, USA). Specimens were stored in RNAlater overnight at 4.0 C and thereafter snap-frozen and stored in liquid nitrogen. All further processing occurred simultaneously for gingival …
GSM404012	Sample 2 from patient 3, Affected site	Patient 3 gingival tissue sample collected as Affected	Diseased (BoP + interproximal PPD of>3 mm + concomitant CAL of>2 mm)	Gingival	After collection gingival tissue specimens were thoroughly rinsed with sterile normal saline solution and transferred into Eppendorf tubes containing 5 volumes of a RNA stabilization reagent (RNAlater, Ambion, Austin, TX, USA). Specimens were stored in RNAlater overnight at 4.0 C and thereafter snap-frozen and stored in liquid nitrogen. All further processing occurred simultaneously for gingival …
GSM404013	Sample 3 from patient 3, Unaffected site	Patient 3 gingival tissue sample collected as Unaffected	Healthy (no BoP + PPD of<5 mm + CAL of<3 2 mm	Gingival	After collection gingival tissue specimens were thoroughly rinsed with sterile normal saline solution and transferred into Eppendorf tubes containing 5 volumes of a RNA stabilization reagent (RNAlater, Ambion, Austin, TX, USA). Specimens were stored in RNAlater overnight at 4.0 C and thereafter snap-frozen and stored in liquid nitrogen. All further processing occurred simultaneously for gingival …
GSM404014	Sample 1 from patient 4, Affected site	Patient 4 gingival tissue sample collected as Affected	Diseased (BoP + interproximal PPD of>3 mm + concomitant CAL of>2 mm)	Gingival	After collection gingival tissue specimens were thoroughly rinsed with sterile normal saline solution and transferred into Eppendorf tubes containing 5 volumes of a RNA stabilization reagent (RNAlater, Ambion, Austin, TX, USA). Specimens were stored in RNAlater overnight at 4.0 C and thereafter snap-frozen and stored in liquid nitrogen. All further processing occurred simultaneously for gingival …
GSM404015	Sample 2 from patient 4, Affected site	Patient 4 gingival tissue sample collected as Affected	Diseased (BoP + interproximal PPD of>3 mm + concomitant CAL of>2 mm)	Gingival	After collection gingival tissue specimens were thoroughly rinsed with sterile normal saline solution and transferred into Eppendorf tubes containing 5 volumes of a RNA stabilization reagent (RNAlater, Ambion, Austin, TX, USA). Specimens were stored in RNAlater overnight at 4.0 C and thereafter snap-frozen and stored in liquid nitrogen. All further processing occurred simultaneously for gingival …
GSM404016	Sample 3 from patient 4, Unaffected site	Patient 4 gingival tissue sample collected as Unaffected	Healthy (no BoP + PPD of<5 mm + CAL of<3 2 mm	Gingival	After collection gingival tissue specimens were thoroughly rinsed with sterile normal saline solution and transferred into Eppendorf tubes containing 5 volumes of a RNA stabilization reagent (RNAlater, Ambion, Austin, TX, USA). Specimens were stored in RNAlater overnight at 4.0 C and thereafter snap-frozen and stored in liquid nitrogen. All further processing occurred simultaneously for gingival …
GSM404017	Sample 1 from patient 5, Unaffected site	Patient 5 gingival tissue sample collected as Unaffected	Healthy (no BoP + PPD of<5 mm + CAL of<3 2 mm	Gingival	After collection gingival tissue specimens were thoroughly rinsed with sterile normal saline solution and transferred into Eppendorf tubes containing 5 volumes of a RNA stabilization reagent (RNAlater, Ambion, Austin, TX, USA). Specimens were stored in RNAlater overnight at 4.0 C and thereafter snap-frozen and stored in liquid nitrogen. All further processing occurred simultaneously for gingival …
GSM404018	Sample 2 from patient 5, Affected site	Patient 5 gingival tissue sample collected as Affected	Diseased (BoP + interproximal PPD of>3 mm + concomitant CAL of>2 mm)	Gingival	After collection gingival tissue specimens were thoroughly rinsed with sterile normal saline solution and transferred into Eppendorf tubes containing 5 volumes of a RNA stabilization reagent (RNAlater, Ambion, Austin, TX, USA). Specimens were stored in RNAlater overnight at 4.0 C and thereafter snap-frozen and stored in liquid nitrogen. All further processing occurred simultaneously for gingival …
GSM404019	Sample 3 from patient 5, Affected site	Patient 5 gingival tissue sample collected as Affected	Diseased (BoP + interproximal PPD of>3 mm + concomitant CAL of>2 mm)	Gingival	After collection gingival tissue specimens were thoroughly rinsed with sterile normal saline solution and transferred into Eppendorf tubes containing 5 volumes of a RNA stabilization reagent (RNAlater, Ambion, Austin, TX, USA). Specimens were stored in RNAlater overnight at 4.0 C and thereafter snap-frozen and stored in liquid nitrogen. All further processing occurred simultaneously for gingival …
GSM404020	Sample 1 from patient 7, Affected site	Patient 7 gingival tissue sample collected as Affected	Diseased (BoP + interproximal PPD of>3 mm + concomitant CAL of>2 mm)	Gingival	After collection gingival tissue specimens were thoroughly rinsed with sterile normal saline solution and transferred into Eppendorf tubes containing 5 volumes of a RNA stabilization reagent (RNAlater, Ambion, Austin, TX, USA). Specimens were stored in RNAlater overnight at 4.0 C and thereafter snap-frozen and stored in liquid nitrogen. All further processing occurred simultaneously for gingival …
GSM404021	Sample 2 from patient 7, Affected site	Patient 7 gingival tissue sample collected as Affected	Diseased (BoP + interproximal PPD of>3 mm + concomitant CAL of>2 mm)	Gingival	After collection gingival tissue specimens were thoroughly rinsed with sterile normal saline solution and transferred into Eppendorf tubes containing 5 volumes of a RNA stabilization reagent (RNAlater, Ambion, Austin, TX, USA). Specimens were stored in RNAlater overnight at 4.0 C and thereafter snap-frozen and stored in liquid nitrogen. All further processing occurred simultaneously for gingival …
GSM404022	Sample 3 from patient 7, Affected site	Patient 7 gingival tissue sample collected as Affected	Diseased (BoP + interproximal PPD of>3 mm + concomitant CAL of>2 mm)	Gingival	After collection gingival tissue specimens were thoroughly rinsed with sterile normal saline solution and transferred into Eppendorf tubes containing 5 volumes of a RNA stabilization reagent (RNAlater, Ambion, Austin, TX, USA). Specimens were stored in RNAlater overnight at 4.0 C and thereafter snap-frozen and stored in liquid nitrogen. All further processing occurred simultaneously for gingival …
GSM404023	Sample 1 from patient 8, Affected site	Patient 8 gingival tissue sample collected as Affected	Diseased (BoP + interproximal PPD of>3 mm + concomitant CAL of>2 mm)	Gingival	After collection gingival tissue specimens were thoroughly rinsed with sterile normal saline solution and transferred into Eppendorf tubes containing 5 volumes of a RNA stabilization reagent (RNAlater, Ambion, Austin, TX, USA). Specimens were stored in RNAlater overnight at 4.0 C and thereafter snap-frozen and stored in liquid nitrogen. All further processing occurred simultaneously for gingival …
GSM404024	Sample 2 from patient 8, Affected site	Patient 8 gingival tissue sample collected as Affected	Diseased (BoP + interproximal PPD of>3 mm + concomitant CAL of>2 mm)	Gingival	After collection gingival tissue specimens were thoroughly rinsed with sterile normal saline solution and transferred into Eppendorf tubes containing 5 volumes of a RNA stabilization reagent (RNAlater, Ambion, Austin, TX, USA). Specimens were stored in RNAlater overnight at 4.0 C and thereafter snap-frozen and stored in liquid nitrogen. All further processing occurred simultaneously for gingival …
GSM404025	Sample 3 from patient 8, Unaffected site	Patient 8 gingival tissue sample collected as Unaffected	Healthy (no BoP + PPD of<5 mm + CAL of<3 2 mm	Gingival	After collection gingival tissue specimens were thoroughly rinsed with sterile normal saline solution and transferred into Eppendorf tubes containing 5 volumes of a RNA stabilization reagent (RNAlater, Ambion, Austin, TX, USA). Specimens were stored in RNAlater overnight at 4.0 C and thereafter snap-frozen and stored in liquid nitrogen. All further processing occurred simultaneously for gingival …
GSM404026	Sample 1 from patient 9, Affected site	Patient 9 gingival tissue sample collected as Affected	Diseased (BoP + interproximal PPD of>3 mm + concomitant CAL of>2 mm)	Gingival	After collection gingival tissue specimens were thoroughly rinsed with sterile normal saline solution and transferred into Eppendorf tubes containing 5 volumes of a RNA stabilization reagent (RNAlater, Ambion, Austin, TX, USA). Specimens were stored in RNAlater overnight at 4.0 C and thereafter snap-frozen and stored in liquid nitrogen. All further processing occurred simultaneously for gingival …
GSM404027	Sample 2 from patient 9, Affected site	Patient 9 gingival tissue sample collected as Affected	Diseased (BoP + interproximal PPD of>3 mm + concomitant CAL of>2 mm)	Gingival	After collection gingival tissue specimens were thoroughly rinsed with sterile normal saline solution and transferred into Eppendorf tubes containing 5 volumes of a RNA stabilization reagent (RNAlater, Ambion, Austin, TX, USA). Specimens were stored in RNAlater overnight at 4.0 C and thereafter snap-frozen and stored in liquid nitrogen. All further processing occurred simultaneously for gingival …
GSM404028	Sample 3 from patient 9, Unaffected site	Patient 9 gingival tissue sample collected as Unaffected	Healthy (no BoP + PPD of<5 mm + CAL of<3 2 mm	Gingival	After collection gingival tissue specimens were thoroughly rinsed with sterile normal saline solution and transferred into Eppendorf tubes containing 5 volumes of a RNA stabilization reagent (RNAlater, Ambion, Austin, TX, USA). Specimens were stored in RNAlater overnight at 4.0 C and thereafter snap-frozen and stored in liquid nitrogen. All further processing occurred simultaneously for gingival …
GSM404029	Sample 1 from patient 10, Affected site	Patient 10 gingival tissue sample collected as Affected	Diseased (BoP + interproximal PPD of>3 mm + concomitant CAL of>2 mm)	Gingival	After collection gingival tissue specimens were thoroughly rinsed with sterile normal saline solution and transferred into Eppendorf tubes containing 5 volumes of a RNA stabilization reagent (RNAlater, Ambion, Austin, TX, USA). Specimens were stored in RNAlater overnight at 4.0 C and thereafter snap-frozen and stored in liquid nitrogen. All further processing occurred simultaneously for gingival …
GSM404030	Sample 2 from patient 10, Affected site	Patient 10 gingival tissue sample collected as Affected	Diseased (BoP + interproximal PPD of>3 mm + concomitant CAL of>2 mm)	Gingival	After collection gingival tissue specimens were thoroughly rinsed with sterile normal saline solution and transferred into Eppendorf tubes containing 5 volumes of a RNA stabilization reagent (RNAlater, Ambion, Austin, TX, USA). Specimens were stored in RNAlater overnight at 4.0 C and thereafter snap-frozen and stored in liquid nitrogen. All further processing occurred simultaneously for gingival …
GSM404031	Sample 4 from patient 10, Unaffected site	Patient 10 gingival tissue sample collected as Unaffected	Healthy (no BoP + PPD of<5 mm + CAL of<3 2 mm	Gingival	After collection gingival tissue specimens were thoroughly rinsed with sterile normal saline solution and transferred into Eppendorf tubes containing 5 volumes of a RNA stabilization reagent (RNAlater, Ambion, Austin, TX, USA). Specimens were stored in RNAlater overnight at 4.0 C and thereafter snap-frozen and stored in liquid nitrogen. All further processing occurred simultaneously for gingival …
GSM404032	Sample 1 from patient 11, Affected site	Patient 11 gingival tissue sample collected as Affected	Diseased (BoP + interproximal PPD of>3 mm + concomitant CAL of>2 mm)	Gingival	After collection gingival tissue specimens were thoroughly rinsed with sterile normal saline solution and transferred into Eppendorf tubes containing 5 volumes of a RNA stabilization reagent (RNAlater, Ambion, Austin, TX, USA). Specimens were stored in RNAlater overnight at 4.0 C and thereafter snap-frozen and stored in liquid nitrogen. All further processing occurred simultaneously for gingival …
GSM404033	Sample 2 from patient 11, Affected site	Patient 11 gingival tissue sample collected as Affected	Diseased (BoP + interproximal PPD of>3 mm + concomitant CAL of>2 mm)	Gingival	After collection gingival tissue specimens were thoroughly rinsed with sterile normal saline solution and transferred into Eppendorf tubes containing 5 volumes of a RNA stabilization reagent (RNAlater, Ambion, Austin, TX, USA). Specimens were stored in RNAlater overnight at 4.0 C and thereafter snap-frozen and stored in liquid nitrogen. All further processing occurred simultaneously for gingival …
GSM404034	Sample 1 from patient 12, Affected site	Patient 12 gingival tissue sample collected as Affected	Diseased (BoP + interproximal PPD of>3 mm + concomitant CAL of>2 mm)	Gingival	After collection gingival tissue specimens were thoroughly rinsed with sterile normal saline solution and transferred into Eppendorf tubes containing 5 volumes of a RNA stabilization reagent (RNAlater, Ambion, Austin, TX, USA). Specimens were stored in RNAlater overnight at 4.0 C and thereafter snap-frozen and stored in liquid nitrogen. All further processing occurred simultaneously for gingival …
GSM404035	Sample 2 from patient 12, Affected site	Patient 12 gingival tissue sample collected as Affected	Diseased (BoP + interproximal PPD of>3 mm + concomitant CAL of>2 mm)	Gingival	After collection gingival tissue specimens were thoroughly rinsed with sterile normal saline solution and transferred into Eppendorf tubes containing 5 volumes of a RNA stabilization reagent (RNAlater, Ambion, Austin, TX, USA). Specimens were stored in RNAlater overnight at 4.0 C and thereafter snap-frozen and stored in liquid nitrogen. All further processing occurred simultaneously for gingival …
GSM404036	Sample 4 from patient 12, Unaffected site	Patient 12 gingival tissue sample collected as Unaffected	Healthy (no BoP + PPD of<5 mm + CAL of<3 2 mm	Gingival	After collection gingival tissue specimens were thoroughly rinsed with sterile normal saline solution and transferred into Eppendorf tubes containing 5 volumes of a RNA stabilization reagent (RNAlater, Ambion, Austin, TX, USA). Specimens were stored in RNAlater overnight at 4.0 C and thereafter snap-frozen and stored in liquid nitrogen. All further processing occurred simultaneously for gingival …
GSM404037	Sample 1 from patient 13, Affected site	Patient 13 gingival tissue sample collected as Affected	Diseased (BoP + interproximal PPD of>3 mm + concomitant CAL of>2 mm)	Gingival	After collection gingival tissue specimens were thoroughly rinsed with sterile normal saline solution and transferred into Eppendorf tubes containing 5 volumes of a RNA stabilization reagent (RNAlater, Ambion, Austin, TX, USA). Specimens were stored in RNAlater overnight at 4.0 C and thereafter snap-frozen and stored in liquid nitrogen. All further processing occurred simultaneously for gingival …
GSM404038	Sample 2 from patient 13, Affected site	Patient 13 gingival tissue sample collected as Affected	Diseased (BoP + interproximal PPD of>3 mm + concomitant CAL of>2 mm)	Gingival	After collection gingival tissue specimens were thoroughly rinsed with sterile normal saline solution and transferred into Eppendorf tubes containing 5 volumes of a RNA stabilization reagent (RNAlater, Ambion, Austin, TX, USA). Specimens were stored in RNAlater overnight at 4.0 C and thereafter snap-frozen and stored in liquid nitrogen. All further processing occurred simultaneously for gingival …
GSM404039	Sample 3 from patient 13, Unaffected site	Patient 13 gingival tissue sample collected as Unaffected	Healthy (no BoP + PPD of<5 mm + CAL of<3 2 mm	Gingival	After collection gingival tissue specimens were thoroughly rinsed with sterile normal saline solution and transferred into Eppendorf tubes containing 5 volumes of a RNA stabilization reagent (RNAlater, Ambion, Austin, TX, USA). Specimens were stored in RNAlater overnight at 4.0 C and thereafter snap-frozen and stored in liquid nitrogen. All further processing occurred simultaneously for gingival …
GSM404040	Sample 1 from patient 14, Affected site	Patient 14 gingival tissue sample collected as Affected	Diseased (BoP + interproximal PPD of>3 mm + concomitant CAL of>2 mm)	Gingival	After collection gingival tissue specimens were thoroughly rinsed with sterile normal saline solution and transferred into Eppendorf tubes containing 5 volumes of a RNA stabilization reagent (RNAlater, Ambion, Austin, TX, USA). Specimens were stored in RNAlater overnight at 4.0 C and thereafter snap-frozen and stored in liquid nitrogen. All further processing occurred simultaneously for gingival …
GSM404041	Sample 2 from patient 14, Affected site	Patient 14 gingival tissue sample collected as Affected	Diseased (BoP + interproximal PPD of>3 mm + concomitant CAL of>2 mm)	Gingival	After collection gingival tissue specimens were thoroughly rinsed with sterile normal saline solution and transferred into Eppendorf tubes containing 5 volumes of a RNA stabilization reagent (RNAlater, Ambion, Austin, TX, USA). Specimens were stored in RNAlater overnight at 4.0 C and thereafter snap-frozen and stored in liquid nitrogen. All further processing occurred simultaneously for gingival …
GSM404042	Sample 3 from patient 14, Unaffected site	Patient 14 gingival tissue sample collected as Unaffected	Healthy (no BoP + PPD of<5 mm + CAL of<3 2 mm	Gingival	After collection gingival tissue specimens were thoroughly rinsed with sterile normal saline solution and transferred into Eppendorf tubes containing 5 volumes of a RNA stabilization reagent (RNAlater, Ambion, Austin, TX, USA). Specimens were stored in RNAlater overnight at 4.0 C and thereafter snap-frozen and stored in liquid nitrogen. All further processing occurred simultaneously for gingival …
GSM404043	Sample 1 from patient 15, Affected site	Patient 15 gingival tissue sample collected as Affected	Diseased (BoP + interproximal PPD of>3 mm + concomitant CAL of>2 mm)	Gingival	After collection gingival tissue specimens were thoroughly rinsed with sterile normal saline solution and transferred into Eppendorf tubes containing 5 volumes of a RNA stabilization reagent (RNAlater, Ambion, Austin, TX, USA). Specimens were stored in RNAlater overnight at 4.0 C and thereafter snap-frozen and stored in liquid nitrogen. All further processing occurred simultaneously for gingival …
GSM404044	Sample 2 from patient 15, Affected site	Patient 15 gingival tissue sample collected as Affected	Diseased (BoP + interproximal PPD of>3 mm + concomitant CAL of>2 mm)	Gingival	After collection gingival tissue specimens were thoroughly rinsed with sterile normal saline solution and transferred into Eppendorf tubes containing 5 volumes of a RNA stabilization reagent (RNAlater, Ambion, Austin, TX, USA). Specimens were stored in RNAlater overnight at 4.0 C and thereafter snap-frozen and stored in liquid nitrogen. All further processing occurred simultaneously for gingival …
GSM404045	Sample 1 from patient 16, Affected site	Patient 16 gingival tissue sample collected as Affected	Diseased (BoP + interproximal PPD of>3 mm + concomitant CAL of>2 mm)	Gingival	After collection gingival tissue specimens were thoroughly rinsed with sterile normal saline solution and transferred into Eppendorf tubes containing 5 volumes of a RNA stabilization reagent (RNAlater, Ambion, Austin, TX, USA). Specimens were stored in RNAlater overnight at 4.0 C and thereafter snap-frozen and stored in liquid nitrogen. All further processing occurred simultaneously for gingival …
GSM404046	Sample 2 from patient 16, Affected site	Patient 16 gingival tissue sample collected as Affected	Diseased (BoP + interproximal PPD of>3 mm + concomitant CAL of>2 mm)	Gingival	After collection gingival tissue specimens were thoroughly rinsed with sterile normal saline solution and transferred into Eppendorf tubes containing 5 volumes of a RNA stabilization reagent (RNAlater, Ambion, Austin, TX, USA). Specimens were stored in RNAlater overnight at 4.0 C and thereafter snap-frozen and stored in liquid nitrogen. All further processing occurred simultaneously for gingival …
GSM404047	Sample 1 from patient 17, Affected site	Patient 17 gingival tissue sample collected as Affected	Diseased (BoP + interproximal PPD of>3 mm + concomitant CAL of>2 mm)	Gingival	After collection gingival tissue specimens were thoroughly rinsed with sterile normal saline solution and transferred into Eppendorf tubes containing 5 volumes of a RNA stabilization reagent (RNAlater, Ambion, Austin, TX, USA). Specimens were stored in RNAlater overnight at 4.0 C and thereafter snap-frozen and stored in liquid nitrogen. All further processing occurred simultaneously for gingival …
GSM404048	Sample 2 from patient 17, Affected site	Patient 17 gingival tissue sample collected as Affected	Diseased (BoP + interproximal PPD of>3 mm + concomitant CAL of>2 mm)	Gingival	After collection gingival tissue specimens were thoroughly rinsed with sterile normal saline solution and transferred into Eppendorf tubes containing 5 volumes of a RNA stabilization reagent (RNAlater, Ambion, Austin, TX, USA). Specimens were stored in RNAlater overnight at 4.0 C and thereafter snap-frozen and stored in liquid nitrogen. All further processing occurred simultaneously for gingival …
GSM404049	Sample 4 from patient 17, Unaffected site	Patient 17 gingival tissue sample collected as Unaffected	Healthy (no BoP + PPD of<5 mm + CAL of<3 2 mm	Gingival	After collection gingival tissue specimens were thoroughly rinsed with sterile normal saline solution and transferred into Eppendorf tubes containing 5 volumes of a RNA stabilization reagent (RNAlater, Ambion, Austin, TX, USA). Specimens were stored in RNAlater overnight at 4.0 C and thereafter snap-frozen and stored in liquid nitrogen. All further processing occurred simultaneously for gingival …
GSM404050	Sample 1 from patient 18, Affected site	Patient 18 gingival tissue sample collected as Affected	Diseased (BoP + interproximal PPD of>3 mm + concomitant CAL of>2 mm)	Gingival	After collection gingival tissue specimens were thoroughly rinsed with sterile normal saline solution and transferred into Eppendorf tubes containing 5 volumes of a RNA stabilization reagent (RNAlater, Ambion, Austin, TX, USA). Specimens were stored in RNAlater overnight at 4.0 C and thereafter snap-frozen and stored in liquid nitrogen. All further processing occurred simultaneously for gingival …
GSM404051	Sample 2 from patient 18, Affected site	Patient 18 gingival tissue sample collected as Affected	Diseased (BoP + interproximal PPD of>3 mm + concomitant CAL of>2 mm)	Gingival	After collection gingival tissue specimens were thoroughly rinsed with sterile normal saline solution and transferred into Eppendorf tubes containing 5 volumes of a RNA stabilization reagent (RNAlater, Ambion, Austin, TX, USA). Specimens were stored in RNAlater overnight at 4.0 C and thereafter snap-frozen and stored in liquid nitrogen. All further processing occurred simultaneously for gingival …
GSM404052	Sample 3 from patient 18, Affected site	Patient 18 gingival tissue sample collected as Affected	Diseased (BoP + interproximal PPD of>3 mm + concomitant CAL of>2 mm)	Gingival	After collection gingival tissue specimens were thoroughly rinsed with sterile normal saline solution and transferred into Eppendorf tubes containing 5 volumes of a RNA stabilization reagent (RNAlater, Ambion, Austin, TX, USA). Specimens were stored in RNAlater overnight at 4.0 C and thereafter snap-frozen and stored in liquid nitrogen. All further processing occurred simultaneously for gingival …
GSM404053	Sample 4 from patient 18, Unaffected site	Patient 18 gingival tissue sample collected as Unaffected	Healthy (no BoP + PPD of<5 mm + CAL of<3 2 mm	Gingival	After collection gingival tissue specimens were thoroughly rinsed with sterile normal saline solution and transferred into Eppendorf tubes containing 5 volumes of a RNA stabilization reagent (RNAlater, Ambion, Austin, TX, USA). Specimens were stored in RNAlater overnight at 4.0 C and thereafter snap-frozen and stored in liquid nitrogen. All further processing occurred simultaneously for gingival …
GSM404054	Sample 1 from patient 20, Unaffected site	Patient 20 gingival tissue sample collected as Unaffected	Healthy (no BoP + PPD of<5 mm + CAL of<3 2 mm	Gingival	After collection gingival tissue specimens were thoroughly rinsed with sterile normal saline solution and transferred into Eppendorf tubes containing 5 volumes of a RNA stabilization reagent (RNAlater, Ambion, Austin, TX, USA). Specimens were stored in RNAlater overnight at 4.0 C and thereafter snap-frozen and stored in liquid nitrogen. All further processing occurred simultaneously for gingival …
GSM404055	Sample 2 from patient 20, Affected site	Patient 20 gingival tissue sample collected as Affected	Diseased (BoP + interproximal PPD of>3 mm + concomitant CAL of>2 mm)	Gingival	After collection gingival tissue specimens were thoroughly rinsed with sterile normal saline solution and transferred into Eppendorf tubes containing 5 volumes of a RNA stabilization reagent (RNAlater, Ambion, Austin, TX, USA). Specimens were stored in RNAlater overnight at 4.0 C and thereafter snap-frozen and stored in liquid nitrogen. All further processing occurred simultaneously for gingival …
GSM404056	Sample 3 from patient 20, Affected site	Patient 20 gingival tissue sample collected as Affected	Diseased (BoP + interproximal PPD of>3 mm + concomitant CAL of>2 mm)	Gingival	After collection gingival tissue specimens were thoroughly rinsed with sterile normal saline solution and transferred into Eppendorf tubes containing 5 volumes of a RNA stabilization reagent (RNAlater, Ambion, Austin, TX, USA). Specimens were stored in RNAlater overnight at 4.0 C and thereafter snap-frozen and stored in liquid nitrogen. All further processing occurred simultaneously for gingival …
GSM404057	Sample 1 from patient 21, Affected site	Patient 21 gingival tissue sample collected as Affected	Diseased (BoP + interproximal PPD of>3 mm + concomitant CAL of>2 mm)	Gingival	After collection gingival tissue specimens were thoroughly rinsed with sterile normal saline solution and transferred into Eppendorf tubes containing 5 volumes of a RNA stabilization reagent (RNAlater, Ambion, Austin, TX, USA). Specimens were stored in RNAlater overnight at 4.0 C and thereafter snap-frozen and stored in liquid nitrogen. All further processing occurred simultaneously for gingival …
GSM404058	Sample 2 from patient 21, Affected site	Patient 21 gingival tissue sample collected as Affected	Diseased (BoP + interproximal PPD of>3 mm + concomitant CAL of>2 mm)	Gingival	After collection gingival tissue specimens were thoroughly rinsed with sterile normal saline solution and transferred into Eppendorf tubes containing 5 volumes of a RNA stabilization reagent (RNAlater, Ambion, Austin, TX, USA). Specimens were stored in RNAlater overnight at 4.0 C and thereafter snap-frozen and stored in liquid nitrogen. All further processing occurred simultaneously for gingival …
GSM404059	Sample 3 from patient 21, Unaffected site	Patient 21 gingival tissue sample collected as Unaffected	Healthy (no BoP + PPD of<5 mm + CAL of<3 2 mm	Gingival	After collection gingival tissue specimens were thoroughly rinsed with sterile normal saline solution and transferred into Eppendorf tubes containing 5 volumes of a RNA stabilization reagent (RNAlater, Ambion, Austin, TX, USA). Specimens were stored in RNAlater overnight at 4.0 C and thereafter snap-frozen and stored in liquid nitrogen. All further processing occurred simultaneously for gingival …
GSM404060	Sample 1 from patient 22, Affected site	Patient 22 gingival tissue sample collected as Affected	Diseased (BoP + interproximal PPD of>3 mm + concomitant CAL of>2 mm)	Gingival	After collection gingival tissue specimens were thoroughly rinsed with sterile normal saline solution and transferred into Eppendorf tubes containing 5 volumes of a RNA stabilization reagent (RNAlater, Ambion, Austin, TX, USA). Specimens were stored in RNAlater overnight at 4.0 C and thereafter snap-frozen and stored in liquid nitrogen. All further processing occurred simultaneously for gingival …
GSM404061	Sample 2 from patient 22, Affected site	Patient 22 gingival tissue sample collected as Affected	Diseased (BoP + interproximal PPD of>3 mm + concomitant CAL of>2 mm)	Gingival	After collection gingival tissue specimens were thoroughly rinsed with sterile normal saline solution and transferred into Eppendorf tubes containing 5 volumes of a RNA stabilization reagent (RNAlater, Ambion, Austin, TX, USA). Specimens were stored in RNAlater overnight at 4.0 C and thereafter snap-frozen and stored in liquid nitrogen. All further processing occurred simultaneously for gingival …
GSM404062	Sample 1 from patient 23, Affected site	Patient 23 gingival tissue sample collected as Affected	Diseased (BoP + interproximal PPD of>3 mm + concomitant CAL of>2 mm)	Gingival	After collection gingival tissue specimens were thoroughly rinsed with sterile normal saline solution and transferred into Eppendorf tubes containing 5 volumes of a RNA stabilization reagent (RNAlater, Ambion, Austin, TX, USA). Specimens were stored in RNAlater overnight at 4.0 C and thereafter snap-frozen and stored in liquid nitrogen. All further processing occurred simultaneously for gingival …
GSM404063	Sample 2 from patient 23, Affected site	Patient 23 gingival tissue sample collected as Affected	Diseased (BoP + interproximal PPD of>3 mm + concomitant CAL of>2 mm)	Gingival	After collection gingival tissue specimens were thoroughly rinsed with sterile normal saline solution and transferred into Eppendorf tubes containing 5 volumes of a RNA stabilization reagent (RNAlater, Ambion, Austin, TX, USA). Specimens were stored in RNAlater overnight at 4.0 C and thereafter snap-frozen and stored in liquid nitrogen. All further processing occurred simultaneously for gingival …
GSM404064	Sample 4 from patient 23, Unaffected site	Patient 23 gingival tissue sample collected as Unaffected	Healthy (no BoP + PPD of<5 mm + CAL of<3 2 mm	Gingival	After collection gingival tissue specimens were thoroughly rinsed with sterile normal saline solution and transferred into Eppendorf tubes containing 5 volumes of a RNA stabilization reagent (RNAlater, Ambion, Austin, TX, USA). Specimens were stored in RNAlater overnight at 4.0 C and thereafter snap-frozen and stored in liquid nitrogen. All further processing occurred simultaneously for gingival …
GSM404065	Sample 1 from patient 24, Affected site	Patient 24 gingival tissue sample collected as Affected	Diseased (BoP + interproximal PPD of>3 mm + concomitant CAL of>2 mm)	Gingival	After collection gingival tissue specimens were thoroughly rinsed with sterile normal saline solution and transferred into Eppendorf tubes containing 5 volumes of a RNA stabilization reagent (RNAlater, Ambion, Austin, TX, USA). Specimens were stored in RNAlater overnight at 4.0 C and thereafter snap-frozen and stored in liquid nitrogen. All further processing occurred simultaneously for gingival …
GSM404066	Sample 2 from patient 24, Affected site	Patient 24 gingival tissue sample collected as Affected	Diseased (BoP + interproximal PPD of>3 mm + concomitant CAL of>2 mm)	Gingival	After collection gingival tissue specimens were thoroughly rinsed with sterile normal saline solution and transferred into Eppendorf tubes containing 5 volumes of a RNA stabilization reagent (RNAlater, Ambion, Austin, TX, USA). Specimens were stored in RNAlater overnight at 4.0 C and thereafter snap-frozen and stored in liquid nitrogen. All further processing occurred simultaneously for gingival …
GSM404067	Sample 1 from patient 25, Affected site	Patient 25 gingival tissue sample collected as Affected	Diseased (BoP + interproximal PPD of>3 mm + concomitant CAL of>2 mm)	Gingival	After collection gingival tissue specimens were thoroughly rinsed with sterile normal saline solution and transferred into Eppendorf tubes containing 5 volumes of a RNA stabilization reagent (RNAlater, Ambion, Austin, TX, USA). Specimens were stored in RNAlater overnight at 4.0 C and thereafter snap-frozen and stored in liquid nitrogen. All further processing occurred simultaneously for gingival …
GSM404068	Sample 2 from patient 25, Affected site	Patient 25 gingival tissue sample collected as Affected	Diseased (BoP + interproximal PPD of>3 mm + concomitant CAL of>2 mm)	Gingival	After collection gingival tissue specimens were thoroughly rinsed with sterile normal saline solution and transferred into Eppendorf tubes containing 5 volumes of a RNA stabilization reagent (RNAlater, Ambion, Austin, TX, USA). Specimens were stored in RNAlater overnight at 4.0 C and thereafter snap-frozen and stored in liquid nitrogen. All further processing occurred simultaneously for gingival …
GSM404069	Sample 1 from patient 26, Affected site	Patient 26 gingival tissue sample collected as Affected	Diseased (BoP + interproximal PPD of>3 mm + concomitant CAL of>2 mm)	Gingival	After collection gingival tissue specimens were thoroughly rinsed with sterile normal saline solution and transferred into Eppendorf tubes containing 5 volumes of a RNA stabilization reagent (RNAlater, Ambion, Austin, TX, USA). Specimens were stored in RNAlater overnight at 4.0 C and thereafter snap-frozen and stored in liquid nitrogen. All further processing occurred simultaneously for gingival …
GSM404070	Sample 2 from patient 26, Affected site	Patient 26 gingival tissue sample collected as Affected	Diseased (BoP + interproximal PPD of>3 mm + concomitant CAL of>2 mm)	Gingival	After collection gingival tissue specimens were thoroughly rinsed with sterile normal saline solution and transferred into Eppendorf tubes containing 5 volumes of a RNA stabilization reagent (RNAlater, Ambion, Austin, TX, USA). Specimens were stored in RNAlater overnight at 4.0 C and thereafter snap-frozen and stored in liquid nitrogen. All further processing occurred simultaneously for gingival …
GSM404071	Sample 4 from patient 26, Unaffected site	Patient 26 gingival tissue sample collected as Unaffected	Healthy (no BoP + PPD of<5 mm + CAL of<3 2 mm	Gingival	After collection gingival tissue specimens were thoroughly rinsed with sterile normal saline solution and transferred into Eppendorf tubes containing 5 volumes of a RNA stabilization reagent (RNAlater, Ambion, Austin, TX, USA). Specimens were stored in RNAlater overnight at 4.0 C and thereafter snap-frozen and stored in liquid nitrogen. All further processing occurred simultaneously for gingival …
GSM404072	Sample 1 from patient 27, Affected site	Patient 27 gingival tissue sample collected as Affected	Diseased (BoP + interproximal PPD of>3 mm + concomitant CAL of>2 mm)	Gingival	After collection gingival tissue specimens were thoroughly rinsed with sterile normal saline solution and transferred into Eppendorf tubes containing 5 volumes of a RNA stabilization reagent (RNAlater, Ambion, Austin, TX, USA). Specimens were stored in RNAlater overnight at 4.0 C and thereafter snap-frozen and stored in liquid nitrogen. All further processing occurred simultaneously for gingival …
GSM404073	Sample 2 from patient 27, Affected site	Patient 27 gingival tissue sample collected as Affected	Diseased (BoP + interproximal PPD of>3 mm + concomitant CAL of>2 mm)	Gingival	After collection gingival tissue specimens were thoroughly rinsed with sterile normal saline solution and transferred into Eppendorf tubes containing 5 volumes of a RNA stabilization reagent (RNAlater, Ambion, Austin, TX, USA). Specimens were stored in RNAlater overnight at 4.0 C and thereafter snap-frozen and stored in liquid nitrogen. All further processing occurred simultaneously for gingival …
GSM404074	Sample 3 from patient 27, Unaffected site	Patient 27 gingival tissue sample collected as Unaffected	Healthy (no BoP + PPD of<5 mm + CAL of<3 2 mm	Gingival	After collection gingival tissue specimens were thoroughly rinsed with sterile normal saline solution and transferred into Eppendorf tubes containing 5 volumes of a RNA stabilization reagent (RNAlater, Ambion, Austin, TX, USA). Specimens were stored in RNAlater overnight at 4.0 C and thereafter snap-frozen and stored in liquid nitrogen. All further processing occurred simultaneously for gingival …
GSM404075	Sample 1 from patient 28, Unaffected site	Patient 28 gingival tissue sample collected as Unaffected	Healthy (no BoP + PPD of<5 mm + CAL of<3 2 mm	Gingival	After collection gingival tissue specimens were thoroughly rinsed with sterile normal saline solution and transferred into Eppendorf tubes containing 5 volumes of a RNA stabilization reagent (RNAlater, Ambion, Austin, TX, USA). Specimens were stored in RNAlater overnight at 4.0 C and thereafter snap-frozen and stored in liquid nitrogen. All further processing occurred simultaneously for gingival …
GSM404076	Sample 2 from patient 28, Affected site	Patient 28 gingival tissue sample collected as Affected	Diseased (BoP + interproximal PPD of>3 mm + concomitant CAL of>2 mm)	Gingival	After collection gingival tissue specimens were thoroughly rinsed with sterile normal saline solution and transferred into Eppendorf tubes containing 5 volumes of a RNA stabilization reagent (RNAlater, Ambion, Austin, TX, USA). Specimens were stored in RNAlater overnight at 4.0 C and thereafter snap-frozen and stored in liquid nitrogen. All further processing occurred simultaneously for gingival …
GSM404077	Sample 3 from patient 28, Affected site	Patient 28 gingival tissue sample collected as Affected	Diseased (BoP + interproximal PPD of>3 mm + concomitant CAL of>2 mm)	Gingival	After collection gingival tissue specimens were thoroughly rinsed with sterile normal saline solution and transferred into Eppendorf tubes containing 5 volumes of a RNA stabilization reagent (RNAlater, Ambion, Austin, TX, USA). Specimens were stored in RNAlater overnight at 4.0 C and thereafter snap-frozen and stored in liquid nitrogen. All further processing occurred simultaneously for gingival …
GSM404078	Sample 1 from patient 29, Affected site	Patient 29 gingival tissue sample collected as Affected	Diseased (BoP + interproximal PPD of>3 mm + concomitant CAL of>2 mm)	Gingival	After collection gingival tissue specimens were thoroughly rinsed with sterile normal saline solution and transferred into Eppendorf tubes containing 5 volumes of a RNA stabilization reagent (RNAlater, Ambion, Austin, TX, USA). Specimens were stored in RNAlater overnight at 4.0 C and thereafter snap-frozen and stored in liquid nitrogen. All further processing occurred simultaneously for gingival …
GSM404079	Sample 2 from patient 29, Affected site	Patient 29 gingival tissue sample collected as Affected	Diseased (BoP + interproximal PPD of>3 mm + concomitant CAL of>2 mm)	Gingival	After collection gingival tissue specimens were thoroughly rinsed with sterile normal saline solution and transferred into Eppendorf tubes containing 5 volumes of a RNA stabilization reagent (RNAlater, Ambion, Austin, TX, USA). Specimens were stored in RNAlater overnight at 4.0 C and thereafter snap-frozen and stored in liquid nitrogen. All further processing occurred simultaneously for gingival …
GSM404080	Sample 3 from patient 29, Unaffected site	Patient 29 gingival tissue sample collected as Unaffected	Healthy (no BoP + PPD of<5 mm + CAL of<3 2 mm	Gingival	After collection gingival tissue specimens were thoroughly rinsed with sterile normal saline solution and transferred into Eppendorf tubes containing 5 volumes of a RNA stabilization reagent (RNAlater, Ambion, Austin, TX, USA). Specimens were stored in RNAlater overnight at 4.0 C and thereafter snap-frozen and stored in liquid nitrogen. All further processing occurred simultaneously for gingival …
GSM404081	Sample 1 from patient 30, Affected site	Patient 30 gingival tissue sample collected as Affected	Diseased (BoP + interproximal PPD of>3 mm + concomitant CAL of>2 mm)	Gingival	After collection gingival tissue specimens were thoroughly rinsed with sterile normal saline solution and transferred into Eppendorf tubes containing 5 volumes of a RNA stabilization reagent (RNAlater, Ambion, Austin, TX, USA). Specimens were stored in RNAlater overnight at 4.0 C and thereafter snap-frozen and stored in liquid nitrogen. All further processing occurred simultaneously for gingival …
GSM404082	Sample 2 from patient 30, Affected site	Patient 30 gingival tissue sample collected as Affected	Diseased (BoP + interproximal PPD of>3 mm + concomitant CAL of>2 mm)	Gingival	After collection gingival tissue specimens were thoroughly rinsed with sterile normal saline solution and transferred into Eppendorf tubes containing 5 volumes of a RNA stabilization reagent (RNAlater, Ambion, Austin, TX, USA). Specimens were stored in RNAlater overnight at 4.0 C and thereafter snap-frozen and stored in liquid nitrogen. All further processing occurred simultaneously for gingival …
GSM404083	Sample 1 from patient 31, Affected site	Patient 31 gingival tissue sample collected as Affected	Diseased (BoP + interproximal PPD of>3 mm + concomitant CAL of>2 mm)	Gingival	After collection gingival tissue specimens were thoroughly rinsed with sterile normal saline solution and transferred into Eppendorf tubes containing 5 volumes of a RNA stabilization reagent (RNAlater, Ambion, Austin, TX, USA). Specimens were stored in RNAlater overnight at 4.0 C and thereafter snap-frozen and stored in liquid nitrogen. All further processing occurred simultaneously for gingival …
GSM404084	Sample 2 from patient 31, Affected site	Patient 31 gingival tissue sample collected as Affected	Diseased (BoP + interproximal PPD of>3 mm + concomitant CAL of>2 mm)	Gingival	After collection gingival tissue specimens were thoroughly rinsed with sterile normal saline solution and transferred into Eppendorf tubes containing 5 volumes of a RNA stabilization reagent (RNAlater, Ambion, Austin, TX, USA). Specimens were stored in RNAlater overnight at 4.0 C and thereafter snap-frozen and stored in liquid nitrogen. All further processing occurred simultaneously for gingival …
GSM404085	Sample 3 from patient 31, Unaffected site	Patient 31 gingival tissue sample collected as Unaffected	Healthy (no BoP + PPD of<5 mm + CAL of<3 2 mm	Gingival	After collection gingival tissue specimens were thoroughly rinsed with sterile normal saline solution and transferred into Eppendorf tubes containing 5 volumes of a RNA stabilization reagent (RNAlater, Ambion, Austin, TX, USA). Specimens were stored in RNAlater overnight at 4.0 C and thereafter snap-frozen and stored in liquid nitrogen. All further processing occurred simultaneously for gingival …
GSM404086	Sample 1 from patient 32, Affected site	Patient 32 gingival tissue sample collected as Affected	Diseased (BoP + interproximal PPD of>3 mm + concomitant CAL of>2 mm)	Gingival	After collection gingival tissue specimens were thoroughly rinsed with sterile normal saline solution and transferred into Eppendorf tubes containing 5 volumes of a RNA stabilization reagent (RNAlater, Ambion, Austin, TX, USA). Specimens were stored in RNAlater overnight at 4.0 C and thereafter snap-frozen and stored in liquid nitrogen. All further processing occurred simultaneously for gingival …
GSM404087	Sample 2 from patient 32, Affected site	Patient 32 gingival tissue sample collected as Affected	Diseased (BoP + interproximal PPD of>3 mm + concomitant CAL of>2 mm)	Gingival	After collection gingival tissue specimens were thoroughly rinsed with sterile normal saline solution and transferred into Eppendorf tubes containing 5 volumes of a RNA stabilization reagent (RNAlater, Ambion, Austin, TX, USA). Specimens were stored in RNAlater overnight at 4.0 C and thereafter snap-frozen and stored in liquid nitrogen. All further processing occurred simultaneously for gingival …
GSM404088	Sample 4 from patient 32, Unaffected site	Patient 32 gingival tissue sample collected as Unaffected	Healthy (no BoP + PPD of<5 mm + CAL of<3 2 mm	Gingival	After collection gingival tissue specimens were thoroughly rinsed with sterile normal saline solution and transferred into Eppendorf tubes containing 5 volumes of a RNA stabilization reagent (RNAlater, Ambion, Austin, TX, USA). Specimens were stored in RNAlater overnight at 4.0 C and thereafter snap-frozen and stored in liquid nitrogen. All further processing occurred simultaneously for gingival …
GSM404089	Sample 1 from patient 33, Affected site	Patient 33 gingival tissue sample collected as Affected	Diseased (BoP + interproximal PPD of>3 mm + concomitant CAL of>2 mm)	Gingival	After collection gingival tissue specimens were thoroughly rinsed with sterile normal saline solution and transferred into Eppendorf tubes containing 5 volumes of a RNA stabilization reagent (RNAlater, Ambion, Austin, TX, USA). Specimens were stored in RNAlater overnight at 4.0 C and thereafter snap-frozen and stored in liquid nitrogen. All further processing occurred simultaneously for gingival …
GSM404090	Sample 2 from patient 33, Affected site	Patient 33 gingival tissue sample collected as Affected	Diseased (BoP + interproximal PPD of>3 mm + concomitant CAL of>2 mm)	Gingival	After collection gingival tissue specimens were thoroughly rinsed with sterile normal saline solution and transferred into Eppendorf tubes containing 5 volumes of a RNA stabilization reagent (RNAlater, Ambion, Austin, TX, USA). Specimens were stored in RNAlater overnight at 4.0 C and thereafter snap-frozen and stored in liquid nitrogen. All further processing occurred simultaneously for gingival …
GSM404091	Sample 1 from patient 34, Affected site	Patient 34 gingival tissue sample collected as Affected	Diseased (BoP + interproximal PPD of>3 mm + concomitant CAL of>2 mm)	Gingival	After collection gingival tissue specimens were thoroughly rinsed with sterile normal saline solution and transferred into Eppendorf tubes containing 5 volumes of a RNA stabilization reagent (RNAlater, Ambion, Austin, TX, USA). Specimens were stored in RNAlater overnight at 4.0 C and thereafter snap-frozen and stored in liquid nitrogen. All further processing occurred simultaneously for gingival …
GSM404092	Sample 2 from patient 34, Affected site	Patient 34 gingival tissue sample collected as Affected	Diseased (BoP + interproximal PPD of>3 mm + concomitant CAL of>2 mm)	Gingival	After collection gingival tissue specimens were thoroughly rinsed with sterile normal saline solution and transferred into Eppendorf tubes containing 5 volumes of a RNA stabilization reagent (RNAlater, Ambion, Austin, TX, USA). Specimens were stored in RNAlater overnight at 4.0 C and thereafter snap-frozen and stored in liquid nitrogen. All further processing occurred simultaneously for gingival …
GSM404093	Sample 3 from patient 34, Unaffected site	Patient 34 gingival tissue sample collected as Unaffected	Healthy (no BoP + PPD of<5 mm + CAL of<3 2 mm	Gingival	After collection gingival tissue specimens were thoroughly rinsed with sterile normal saline solution and transferred into Eppendorf tubes containing 5 volumes of a RNA stabilization reagent (RNAlater, Ambion, Austin, TX, USA). Specimens were stored in RNAlater overnight at 4.0 C and thereafter snap-frozen and stored in liquid nitrogen. All further processing occurred simultaneously for gingival …
GSM404094	Sample 1 from patient 35, Affected site	Patient 35 gingival tissue sample collected as Affected	Diseased (BoP + interproximal PPD of>3 mm + concomitant CAL of>2 mm)	Gingival	After collection gingival tissue specimens were thoroughly rinsed with sterile normal saline solution and transferred into Eppendorf tubes containing 5 volumes of a RNA stabilization reagent (RNAlater, Ambion, Austin, TX, USA). Specimens were stored in RNAlater overnight at 4.0 C and thereafter snap-frozen and stored in liquid nitrogen. All further processing occurred simultaneously for gingival …
GSM404095	Sample 2 from patient 35, Affected site	Patient 35 gingival tissue sample collected as Affected	Diseased (BoP + interproximal PPD of>3 mm + concomitant CAL of>2 mm)	Gingival	After collection gingival tissue specimens were thoroughly rinsed with sterile normal saline solution and transferred into Eppendorf tubes containing 5 volumes of a RNA stabilization reagent (RNAlater, Ambion, Austin, TX, USA). Specimens were stored in RNAlater overnight at 4.0 C and thereafter snap-frozen and stored in liquid nitrogen. All further processing occurred simultaneously for gingival …
GSM404096	Sample 4 from patient 35, Unaffected site	Patient 35 gingival tissue sample collected as Unaffected	Healthy (no BoP + PPD of<5 mm + CAL of<3 2 mm	Gingival	After collection gingival tissue specimens were thoroughly rinsed with sterile normal saline solution and transferred into Eppendorf tubes containing 5 volumes of a RNA stabilization reagent (RNAlater, Ambion, Austin, TX, USA). Specimens were stored in RNAlater overnight at 4.0 C and thereafter snap-frozen and stored in liquid nitrogen. All further processing occurred simultaneously for gingival …
GSM404097	Sample 1 from patient 36, Affected site	Patient 36 gingival tissue sample collected as Affected	Diseased (BoP + interproximal PPD of>3 mm + concomitant CAL of>2 mm)	Gingival	After collection gingival tissue specimens were thoroughly rinsed with sterile normal saline solution and transferred into Eppendorf tubes containing 5 volumes of a RNA stabilization reagent (RNAlater, Ambion, Austin, TX, USA). Specimens were stored in RNAlater overnight at 4.0 C and thereafter snap-frozen and stored in liquid nitrogen. All further processing occurred simultaneously for gingival …
GSM404098	Sample 2 from patient 36, Affected site	Patient 36 gingival tissue sample collected as Affected	Diseased (BoP + interproximal PPD of>3 mm + concomitant CAL of>2 mm)	Gingival	After collection gingival tissue specimens were thoroughly rinsed with sterile normal saline solution and transferred into Eppendorf tubes containing 5 volumes of a RNA stabilization reagent (RNAlater, Ambion, Austin, TX, USA). Specimens were stored in RNAlater overnight at 4.0 C and thereafter snap-frozen and stored in liquid nitrogen. All further processing occurred simultaneously for gingival …
GSM404099	Sample 3 from patient 36, Unaffected site	Patient 36 gingival tissue sample collected as Unaffected	Healthy (no BoP + PPD of<5 mm + CAL of<3 2 mm	Gingival	After collection gingival tissue specimens were thoroughly rinsed with sterile normal saline solution and transferred into Eppendorf tubes containing 5 volumes of a RNA stabilization reagent (RNAlater, Ambion, Austin, TX, USA). Specimens were stored in RNAlater overnight at 4.0 C and thereafter snap-frozen and stored in liquid nitrogen. All further processing occurred simultaneously for gingival …
GSM404100	Sample 1 from patient 37, Affected site	Patient 37 gingival tissue sample collected as Affected	Diseased (BoP + interproximal PPD of>3 mm + concomitant CAL of>2 mm)	Gingival	After collection gingival tissue specimens were thoroughly rinsed with sterile normal saline solution and transferred into Eppendorf tubes containing 5 volumes of a RNA stabilization reagent (RNAlater, Ambion, Austin, TX, USA). Specimens were stored in RNAlater overnight at 4.0 C and thereafter snap-frozen and stored in liquid nitrogen. All further processing occurred simultaneously for gingival …
GSM404101	Sample 2 from patient 37, Affected site	Patient 37 gingival tissue sample collected as Affected	Diseased (BoP + interproximal PPD of>3 mm + concomitant CAL of>2 mm)	Gingival	After collection gingival tissue specimens were thoroughly rinsed with sterile normal saline solution and transferred into Eppendorf tubes containing 5 volumes of a RNA stabilization reagent (RNAlater, Ambion, Austin, TX, USA). Specimens were stored in RNAlater overnight at 4.0 C and thereafter snap-frozen and stored in liquid nitrogen. All further processing occurred simultaneously for gingival …
GSM404102	Sample 3 from patient 37, Unaffected site	Patient 37 gingival tissue sample collected as Unaffected	Healthy (no BoP + PPD of<5 mm + CAL of<3 2 mm	Gingival	After collection gingival tissue specimens were thoroughly rinsed with sterile normal saline solution and transferred into Eppendorf tubes containing 5 volumes of a RNA stabilization reagent (RNAlater, Ambion, Austin, TX, USA). Specimens were stored in RNAlater overnight at 4.0 C and thereafter snap-frozen and stored in liquid nitrogen. All further processing occurred simultaneously for gingival …
GSM404103	Sample 1 from patient 38, Affected site	Patient 38 gingival tissue sample collected as Affected	Diseased (BoP + interproximal PPD of>3 mm + concomitant CAL of>2 mm)	Gingival	After collection gingival tissue specimens were thoroughly rinsed with sterile normal saline solution and transferred into Eppendorf tubes containing 5 volumes of a RNA stabilization reagent (RNAlater, Ambion, Austin, TX, USA). Specimens were stored in RNAlater overnight at 4.0 C and thereafter snap-frozen and stored in liquid nitrogen. All further processing occurred simultaneously for gingival …
GSM404104	Sample 2 from patient 38, Affected site	Patient 38 gingival tissue sample collected as Affected	Diseased (BoP + interproximal PPD of>3 mm + concomitant CAL of>2 mm)	Gingival	After collection gingival tissue specimens were thoroughly rinsed with sterile normal saline solution and transferred into Eppendorf tubes containing 5 volumes of a RNA stabilization reagent (RNAlater, Ambion, Austin, TX, USA). Specimens were stored in RNAlater overnight at 4.0 C and thereafter snap-frozen and stored in liquid nitrogen. All further processing occurred simultaneously for gingival …
GSM404105	Sample 3 from patient 38, Unaffected site	Patient 38 gingival tissue sample collected as Unaffected	Healthy (no BoP + PPD of<5 mm + CAL of<3 2 mm	Gingival	After collection gingival tissue specimens were thoroughly rinsed with sterile normal saline solution and transferred into Eppendorf tubes containing 5 volumes of a RNA stabilization reagent (RNAlater, Ambion, Austin, TX, USA). Specimens were stored in RNAlater overnight at 4.0 C and thereafter snap-frozen and stored in liquid nitrogen. All further processing occurred simultaneously for gingival …
GSM404106	Sample 1 from patient 39, Affected site	Patient 39 gingival tissue sample collected as Affected	Diseased (BoP + interproximal PPD of>3 mm + concomitant CAL of>2 mm)	Gingival	After collection gingival tissue specimens were thoroughly rinsed with sterile normal saline solution and transferred into Eppendorf tubes containing 5 volumes of a RNA stabilization reagent (RNAlater, Ambion, Austin, TX, USA). Specimens were stored in RNAlater overnight at 4.0 C and thereafter snap-frozen and stored in liquid nitrogen. All further processing occurred simultaneously for gingival …
GSM404107	Sample 2 from patient 39, Affected site	Patient 39 gingival tissue sample collected as Affected	Diseased (BoP + interproximal PPD of>3 mm + concomitant CAL of>2 mm)	Gingival	After collection gingival tissue specimens were thoroughly rinsed with sterile normal saline solution and transferred into Eppendorf tubes containing 5 volumes of a RNA stabilization reagent (RNAlater, Ambion, Austin, TX, USA). Specimens were stored in RNAlater overnight at 4.0 C and thereafter snap-frozen and stored in liquid nitrogen. All further processing occurred simultaneously for gingival …
GSM404108	Sample 3 from patient 39, Unaffected site	Patient 39 gingival tissue sample collected as Unaffected	Healthy (no BoP + PPD of<5 mm + CAL of<3 2 mm	Gingival	After collection gingival tissue specimens were thoroughly rinsed with sterile normal saline solution and transferred into Eppendorf tubes containing 5 volumes of a RNA stabilization reagent (RNAlater, Ambion, Austin, TX, USA). Specimens were stored in RNAlater overnight at 4.0 C and thereafter snap-frozen and stored in liquid nitrogen. All further processing occurred simultaneously for gingival …
GSM404109	Sample 1 from patient 40, Affected site	Patient 40 gingival tissue sample collected as Affected	Diseased (BoP + interproximal PPD of>3 mm + concomitant CAL of>2 mm)	Gingival	After collection gingival tissue specimens were thoroughly rinsed with sterile normal saline solution and transferred into Eppendorf tubes containing 5 volumes of a RNA stabilization reagent (RNAlater, Ambion, Austin, TX, USA). Specimens were stored in RNAlater overnight at 4.0 C and thereafter snap-frozen and stored in liquid nitrogen. All further processing occurred simultaneously for gingival …
GSM404110	Sample 2 from patient 40, Affected site	Patient 40 gingival tissue sample collected as Affected	Diseased (BoP + interproximal PPD of>3 mm + concomitant CAL of>2 mm)	Gingival	After collection gingival tissue specimens were thoroughly rinsed with sterile normal saline solution and transferred into Eppendorf tubes containing 5 volumes of a RNA stabilization reagent (RNAlater, Ambion, Austin, TX, USA). Specimens were stored in RNAlater overnight at 4.0 C and thereafter snap-frozen and stored in liquid nitrogen. All further processing occurred simultaneously for gingival …
GSM404111	Sample 1 from patient 41, Affected site	Patient 41 gingival tissue sample collected as Affected	Diseased (BoP + interproximal PPD of>3 mm + concomitant CAL of>2 mm)	Gingival	After collection gingival tissue specimens were thoroughly rinsed with sterile normal saline solution and transferred into Eppendorf tubes containing 5 volumes of a RNA stabilization reagent (RNAlater, Ambion, Austin, TX, USA). Specimens were stored in RNAlater overnight at 4.0 C and thereafter snap-frozen and stored in liquid nitrogen. All further processing occurred simultaneously for gingival …
GSM404112	Sample 2 from patient 41, Affected site	Patient 41 gingival tissue sample collected as Affected	Diseased (BoP + interproximal PPD of>3 mm + concomitant CAL of>2 mm)	Gingival	After collection gingival tissue specimens were thoroughly rinsed with sterile normal saline solution and transferred into Eppendorf tubes containing 5 volumes of a RNA stabilization reagent (RNAlater, Ambion, Austin, TX, USA). Specimens were stored in RNAlater overnight at 4.0 C and thereafter snap-frozen and stored in liquid nitrogen. All further processing occurred simultaneously for gingival …
GSM404113	Sample 1 from patient 42, Affected site	Patient 42 gingival tissue sample collected as Affected	Diseased (BoP + interproximal PPD of>3 mm + concomitant CAL of>2 mm)	Gingival	After collection gingival tissue specimens were thoroughly rinsed with sterile normal saline solution and transferred into Eppendorf tubes containing 5 volumes of a RNA stabilization reagent (RNAlater, Ambion, Austin, TX, USA). Specimens were stored in RNAlater overnight at 4.0 C and thereafter snap-frozen and stored in liquid nitrogen. All further processing occurred simultaneously for gingival …
GSM404114	Sample 2 from patient 42, Affected site	Patient 42 gingival tissue sample collected as Affected	Diseased (BoP + interproximal PPD of>3 mm + concomitant CAL of>2 mm)	Gingival	After collection gingival tissue specimens were thoroughly rinsed with sterile normal saline solution and transferred into Eppendorf tubes containing 5 volumes of a RNA stabilization reagent (RNAlater, Ambion, Austin, TX, USA). Specimens were stored in RNAlater overnight at 4.0 C and thereafter snap-frozen and stored in liquid nitrogen. All further processing occurred simultaneously for gingival …
GSM404115	Sample 3 from patient 42, Unaffected site	Patient 42 gingival tissue sample collected as Unaffected	Healthy (no BoP + PPD of<5 mm + CAL of<3 2 mm	Gingival	After collection gingival tissue specimens were thoroughly rinsed with sterile normal saline solution and transferred into Eppendorf tubes containing 5 volumes of a RNA stabilization reagent (RNAlater, Ambion, Austin, TX, USA). Specimens were stored in RNAlater overnight at 4.0 C and thereafter snap-frozen and stored in liquid nitrogen. All further processing occurred simultaneously for gingival …
GSM404116	Sample 2 from patient 43, Affected site	Patient 43 gingival tissue sample collected as Affected	Diseased (BoP + interproximal PPD of>3 mm + concomitant CAL of>2 mm)	Gingival	After collection gingival tissue specimens were thoroughly rinsed with sterile normal saline solution and transferred into Eppendorf tubes containing 5 volumes of a RNA stabilization reagent (RNAlater, Ambion, Austin, TX, USA). Specimens were stored in RNAlater overnight at 4.0 C and thereafter snap-frozen and stored in liquid nitrogen. All further processing occurred simultaneously for gingival …
GSM404117	Sample 4 from patient 43, Unaffected site	Patient 43 gingival tissue sample collected as Unaffected	Healthy (no BoP + PPD of<5 mm + CAL of<3 2 mm	Gingival	After collection gingival tissue specimens were thoroughly rinsed with sterile normal saline solution and transferred into Eppendorf tubes containing 5 volumes of a RNA stabilization reagent (RNAlater, Ambion, Austin, TX, USA). Specimens were stored in RNAlater overnight at 4.0 C and thereafter snap-frozen and stored in liquid nitrogen. All further processing occurred simultaneously for gingival …
GSM404118	Sample 1 from patient 44, Affected site	Patient 44 gingival tissue sample collected as Affected	Diseased (BoP + interproximal PPD of>3 mm + concomitant CAL of>2 mm)	Gingival	After collection gingival tissue specimens were thoroughly rinsed with sterile normal saline solution and transferred into Eppendorf tubes containing 5 volumes of a RNA stabilization reagent (RNAlater, Ambion, Austin, TX, USA). Specimens were stored in RNAlater overnight at 4.0 C and thereafter snap-frozen and stored in liquid nitrogen. All further processing occurred simultaneously for gingival …
GSM404119	Sample 2 from patient 44, Affected site	Patient 44 gingival tissue sample collected as Affected	Diseased (BoP + interproximal PPD of>3 mm + concomitant CAL of>2 mm)	Gingival	After collection gingival tissue specimens were thoroughly rinsed with sterile normal saline solution and transferred into Eppendorf tubes containing 5 volumes of a RNA stabilization reagent (RNAlater, Ambion, Austin, TX, USA). Specimens were stored in RNAlater overnight at 4.0 C and thereafter snap-frozen and stored in liquid nitrogen. All further processing occurred simultaneously for gingival …
GSM404120	Sample 1 from patient 45, Affected site	Patient 45 gingival tissue sample collected as Affected	Diseased (BoP + interproximal PPD of>3 mm + concomitant CAL of>2 mm)	Gingival	After collection gingival tissue specimens were thoroughly rinsed with sterile normal saline solution and transferred into Eppendorf tubes containing 5 volumes of a RNA stabilization reagent (RNAlater, Ambion, Austin, TX, USA). Specimens were stored in RNAlater overnight at 4.0 C and thereafter snap-frozen and stored in liquid nitrogen. All further processing occurred simultaneously for gingival …
GSM404121	Sample 2 from patient 45, Affected site	Patient 45 gingival tissue sample collected as Affected	Diseased (BoP + interproximal PPD of>3 mm + concomitant CAL of>2 mm)	Gingival	After collection gingival tissue specimens were thoroughly rinsed with sterile normal saline solution and transferred into Eppendorf tubes containing 5 volumes of a RNA stabilization reagent (RNAlater, Ambion, Austin, TX, USA). Specimens were stored in RNAlater overnight at 4.0 C and thereafter snap-frozen and stored in liquid nitrogen. All further processing occurred simultaneously for gingival …
GSM404122	Sample 3 from patient 45, Unaffected site	Patient 45 gingival tissue sample collected as Unaffected	Healthy (no BoP + PPD of<5 mm + CAL of<3 2 mm	Gingival	After collection gingival tissue specimens were thoroughly rinsed with sterile normal saline solution and transferred into Eppendorf tubes containing 5 volumes of a RNA stabilization reagent (RNAlater, Ambion, Austin, TX, USA). Specimens were stored in RNAlater overnight at 4.0 C and thereafter snap-frozen and stored in liquid nitrogen. All further processing occurred simultaneously for gingival …
GSM404123	Sample 1 from patient 46, Affected site	Patient 46 gingival tissue sample collected as Affected	Diseased (BoP + interproximal PPD of>3 mm + concomitant CAL of>2 mm)	Gingival	After collection gingival tissue specimens were thoroughly rinsed with sterile normal saline solution and transferred into Eppendorf tubes containing 5 volumes of a RNA stabilization reagent (RNAlater, Ambion, Austin, TX, USA). Specimens were stored in RNAlater overnight at 4.0 C and thereafter snap-frozen and stored in liquid nitrogen. All further processing occurred simultaneously for gingival …
GSM404124	Sample 2 from patient 46, Affected site	Patient 46 gingival tissue sample collected as Affected	Diseased (BoP + interproximal PPD of>3 mm + concomitant CAL of>2 mm)	Gingival	After collection gingival tissue specimens were thoroughly rinsed with sterile normal saline solution and transferred into Eppendorf tubes containing 5 volumes of a RNA stabilization reagent (RNAlater, Ambion, Austin, TX, USA). Specimens were stored in RNAlater overnight at 4.0 C and thereafter snap-frozen and stored in liquid nitrogen. All further processing occurred simultaneously for gingival …
GSM404125	Sample 3 from patient 46, Unaffected site	Patient 46 gingival tissue sample collected as Unaffected	Healthy (no BoP + PPD of<5 mm + CAL of<3 2 mm	Gingival	After collection gingival tissue specimens were thoroughly rinsed with sterile normal saline solution and transferred into Eppendorf tubes containing 5 volumes of a RNA stabilization reagent (RNAlater, Ambion, Austin, TX, USA). Specimens were stored in RNAlater overnight at 4.0 C and thereafter snap-frozen and stored in liquid nitrogen. All further processing occurred simultaneously for gingival …
GSM404126	Sample 1 from patient 47, Affected site	Patient 47 gingival tissue sample collected as Affected	Diseased (BoP + interproximal PPD of>3 mm + concomitant CAL of>2 mm)	Gingival	After collection gingival tissue specimens were thoroughly rinsed with sterile normal saline solution and transferred into Eppendorf tubes containing 5 volumes of a RNA stabilization reagent (RNAlater, Ambion, Austin, TX, USA). Specimens were stored in RNAlater overnight at 4.0 C and thereafter snap-frozen and stored in liquid nitrogen. All further processing occurred simultaneously for gingival …
GSM404127	Sample 2 from patient 47, Affected site	Patient 47 gingival tissue sample collected as Affected	Diseased (BoP + interproximal PPD of>3 mm + concomitant CAL of>2 mm)	Gingival	After collection gingival tissue specimens were thoroughly rinsed with sterile normal saline solution and transferred into Eppendorf tubes containing 5 volumes of a RNA stabilization reagent (RNAlater, Ambion, Austin, TX, USA). Specimens were stored in RNAlater overnight at 4.0 C and thereafter snap-frozen and stored in liquid nitrogen. All further processing occurred simultaneously for gingival …
GSM404128	Sample 3 from patient 47, Unaffected site	Patient 47 gingival tissue sample collected as Unaffected	Healthy (no BoP + PPD of<5 mm + CAL of<3 2 mm	Gingival	After collection gingival tissue specimens were thoroughly rinsed with sterile normal saline solution and transferred into Eppendorf tubes containing 5 volumes of a RNA stabilization reagent (RNAlater, Ambion, Austin, TX, USA). Specimens were stored in RNAlater overnight at 4.0 C and thereafter snap-frozen and stored in liquid nitrogen. All further processing occurred simultaneously for gingival …
GSM404129	Sample 1 from patient 48, Affected site	Patient 48 gingival tissue sample collected as Affected	Diseased (BoP + interproximal PPD of>3 mm + concomitant CAL of>2 mm)	Gingival	After collection gingival tissue specimens were thoroughly rinsed with sterile normal saline solution and transferred into Eppendorf tubes containing 5 volumes of a RNA stabilization reagent (RNAlater, Ambion, Austin, TX, USA). Specimens were stored in RNAlater overnight at 4.0 C and thereafter snap-frozen and stored in liquid nitrogen. All further processing occurred simultaneously for gingival …
GSM404130	Sample 2 from patient 48, Affected site	Patient 48 gingival tissue sample collected as Affected	Diseased (BoP + interproximal PPD of>3 mm + concomitant CAL of>2 mm)	Gingival	After collection gingival tissue specimens were thoroughly rinsed with sterile normal saline solution and transferred into Eppendorf tubes containing 5 volumes of a RNA stabilization reagent (RNAlater, Ambion, Austin, TX, USA). Specimens were stored in RNAlater overnight at 4.0 C and thereafter snap-frozen and stored in liquid nitrogen. All further processing occurred simultaneously for gingival …
GSM404131	Sample 3 from patient 48, Unaffected site	Patient 48 gingival tissue sample collected as Unaffected	Healthy (no BoP + PPD of<5 mm + CAL of<3 2 mm	Gingival	After collection gingival tissue specimens were thoroughly rinsed with sterile normal saline solution and transferred into Eppendorf tubes containing 5 volumes of a RNA stabilization reagent (RNAlater, Ambion, Austin, TX, USA). Specimens were stored in RNAlater overnight at 4.0 C and thereafter snap-frozen and stored in liquid nitrogen. All further processing occurred simultaneously for gingival …
GSM404132	Sample 1 from patient 49, Affected site	Patient 49 gingival tissue sample collected as Affected	Diseased (BoP + interproximal PPD of>3 mm + concomitant CAL of>2 mm)	Gingival	After collection gingival tissue specimens were thoroughly rinsed with sterile normal saline solution and transferred into Eppendorf tubes containing 5 volumes of a RNA stabilization reagent (RNAlater, Ambion, Austin, TX, USA). Specimens were stored in RNAlater overnight at 4.0 C and thereafter snap-frozen and stored in liquid nitrogen. All further processing occurred simultaneously for gingival …
GSM404133	Sample 2 from patient 49, Affected site	Patient 49 gingival tissue sample collected as Affected	Diseased (BoP + interproximal PPD of>3 mm + concomitant CAL of>2 mm)	Gingival	After collection gingival tissue specimens were thoroughly rinsed with sterile normal saline solution and transferred into Eppendorf tubes containing 5 volumes of a RNA stabilization reagent (RNAlater, Ambion, Austin, TX, USA). Specimens were stored in RNAlater overnight at 4.0 C and thereafter snap-frozen and stored in liquid nitrogen. All further processing occurred simultaneously for gingival …
GSM404134	Sample 3 from patient 49, Unaffected site	Patient 49 gingival tissue sample collected as Unaffected	Healthy (no BoP + PPD of<5 mm + CAL of<3 2 mm	Gingival	After collection gingival tissue specimens were thoroughly rinsed with sterile normal saline solution and transferred into Eppendorf tubes containing 5 volumes of a RNA stabilization reagent (RNAlater, Ambion, Austin, TX, USA). Specimens were stored in RNAlater overnight at 4.0 C and thereafter snap-frozen and stored in liquid nitrogen. All further processing occurred simultaneously for gingival …
GSM404135	Sample 1 from patient 50, Affected site	Patient 50 gingival tissue sample collected as Affected	Diseased (BoP + interproximal PPD of>3 mm + concomitant CAL of>2 mm)	Gingival	After collection gingival tissue specimens were thoroughly rinsed with sterile normal saline solution and transferred into Eppendorf tubes containing 5 volumes of a RNA stabilization reagent (RNAlater, Ambion, Austin, TX, USA). Specimens were stored in RNAlater overnight at 4.0 C and thereafter snap-frozen and stored in liquid nitrogen. All further processing occurred simultaneously for gingival …
GSM404136	Sample 2 from patient 50, Affected site	Patient 50 gingival tissue sample collected as Affected	Diseased (BoP + interproximal PPD of>3 mm + concomitant CAL of>2 mm)	Gingival	After collection gingival tissue specimens were thoroughly rinsed with sterile normal saline solution and transferred into Eppendorf tubes containing 5 volumes of a RNA stabilization reagent (RNAlater, Ambion, Austin, TX, USA). Specimens were stored in RNAlater overnight at 4.0 C and thereafter snap-frozen and stored in liquid nitrogen. All further processing occurred simultaneously for gingival …
GSM404137	Sample 1 from patient 52, Affected site	Patient 52 gingival tissue sample collected as Affected	Diseased (BoP + interproximal PPD of>3 mm + concomitant CAL of>2 mm)	Gingival	After collection gingival tissue specimens were thoroughly rinsed with sterile normal saline solution and transferred into Eppendorf tubes containing 5 volumes of a RNA stabilization reagent (RNAlater, Ambion, Austin, TX, USA). Specimens were stored in RNAlater overnight at 4.0 C and thereafter snap-frozen and stored in liquid nitrogen. All further processing occurred simultaneously for gingival …
GSM404138	Sample 2 from patient 52, Affected site	Patient 52 gingival tissue sample collected as Affected	Diseased (BoP + interproximal PPD of>3 mm + concomitant CAL of>2 mm)	Gingival	After collection gingival tissue specimens were thoroughly rinsed with sterile normal saline solution and transferred into Eppendorf tubes containing 5 volumes of a RNA stabilization reagent (RNAlater, Ambion, Austin, TX, USA). Specimens were stored in RNAlater overnight at 4.0 C and thereafter snap-frozen and stored in liquid nitrogen. All further processing occurred simultaneously for gingival …
GSM404139	Sample 2 from patient 53, Affected site	Patient 53 gingival tissue sample collected as Affected	Diseased (BoP + interproximal PPD of>3 mm + concomitant CAL of>2 mm)	Gingival	After collection gingival tissue specimens were thoroughly rinsed with sterile normal saline solution and transferred into Eppendorf tubes containing 5 volumes of a RNA stabilization reagent (RNAlater, Ambion, Austin, TX, USA). Specimens were stored in RNAlater overnight at 4.0 C and thereafter snap-frozen and stored in liquid nitrogen. All further processing occurred simultaneously for gingival …
GSM404140	Sample 3 from patient 53, Affected site	Patient 53 gingival tissue sample collected as Affected	Diseased (BoP + interproximal PPD of>3 mm + concomitant CAL of>2 mm)	Gingival	After collection gingival tissue specimens were thoroughly rinsed with sterile normal saline solution and transferred into Eppendorf tubes containing 5 volumes of a RNA stabilization reagent (RNAlater, Ambion, Austin, TX, USA). Specimens were stored in RNAlater overnight at 4.0 C and thereafter snap-frozen and stored in liquid nitrogen. All further processing occurred simultaneously for gingival …
GSM404141	Sample 1 from patient 54, Affected site	Patient 54 gingival tissue sample collected as Affected	Diseased (BoP + interproximal PPD of>3 mm + concomitant CAL of>2 mm)	Gingival	After collection gingival tissue specimens were thoroughly rinsed with sterile normal saline solution and transferred into Eppendorf tubes containing 5 volumes of a RNA stabilization reagent (RNAlater, Ambion, Austin, TX, USA). Specimens were stored in RNAlater overnight at 4.0 C and thereafter snap-frozen and stored in liquid nitrogen. All further processing occurred simultaneously for gingival …
GSM404142	Sample 2 from patient 54, Affected site	Patient 54 gingival tissue sample collected as Affected	Diseased (BoP + interproximal PPD of>3 mm + concomitant CAL of>2 mm)	Gingival	After collection gingival tissue specimens were thoroughly rinsed with sterile normal saline solution and transferred into Eppendorf tubes containing 5 volumes of a RNA stabilization reagent (RNAlater, Ambion, Austin, TX, USA). Specimens were stored in RNAlater overnight at 4.0 C and thereafter snap-frozen and stored in liquid nitrogen. All further processing occurred simultaneously for gingival …
GSM404143	Sample 3 from patient 54, Unaffected site	Patient 54 gingival tissue sample collected as Unaffected	Healthy (no BoP + PPD of<5 mm + CAL of<3 2 mm	Gingival	After collection gingival tissue specimens were thoroughly rinsed with sterile normal saline solution and transferred into Eppendorf tubes containing 5 volumes of a RNA stabilization reagent (RNAlater, Ambion, Austin, TX, USA). Specimens were stored in RNAlater overnight at 4.0 C and thereafter snap-frozen and stored in liquid nitrogen. All further processing occurred simultaneously for gingival …
GSM404144	Sample 1 from patient 55, Affected site	Patient 55 gingival tissue sample collected as Affected	Diseased (BoP + interproximal PPD of>3 mm + concomitant CAL of>2 mm)	Gingival	After collection gingival tissue specimens were thoroughly rinsed with sterile normal saline solution and transferred into Eppendorf tubes containing 5 volumes of a RNA stabilization reagent (RNAlater, Ambion, Austin, TX, USA). Specimens were stored in RNAlater overnight at 4.0 C and thereafter snap-frozen and stored in liquid nitrogen. All further processing occurred simultaneously for gingival …
GSM404145	Sample 2 from patient 55, Affected site	Patient 55 gingival tissue sample collected as Affected	Diseased (BoP + interproximal PPD of>3 mm + concomitant CAL of>2 mm)	Gingival	After collection gingival tissue specimens were thoroughly rinsed with sterile normal saline solution and transferred into Eppendorf tubes containing 5 volumes of a RNA stabilization reagent (RNAlater, Ambion, Austin, TX, USA). Specimens were stored in RNAlater overnight at 4.0 C and thereafter snap-frozen and stored in liquid nitrogen. All further processing occurred simultaneously for gingival …
GSM404146	Sample 3 from patient 55, Unaffected site	Patient 55 gingival tissue sample collected as Unaffected	Healthy (no BoP + PPD of<5 mm + CAL of<3 2 mm	Gingival	After collection gingival tissue specimens were thoroughly rinsed with sterile normal saline solution and transferred into Eppendorf tubes containing 5 volumes of a RNA stabilization reagent (RNAlater, Ambion, Austin, TX, USA). Specimens were stored in RNAlater overnight at 4.0 C and thereafter snap-frozen and stored in liquid nitrogen. All further processing occurred simultaneously for gingival …
GSM404147	Sample 1 from patient 56, Affected site	Patient 56 gingival tissue sample collected as Affected	Diseased (BoP + interproximal PPD of>3 mm + concomitant CAL of>2 mm)	Gingival	After collection gingival tissue specimens were thoroughly rinsed with sterile normal saline solution and transferred into Eppendorf tubes containing 5 volumes of a RNA stabilization reagent (RNAlater, Ambion, Austin, TX, USA). Specimens were stored in RNAlater overnight at 4.0 C and thereafter snap-frozen and stored in liquid nitrogen. All further processing occurred simultaneously for gingival …
GSM404148	Sample 2 from patient 56, Affected site	Patient 56 gingival tissue sample collected as Affected	Diseased (BoP + interproximal PPD of>3 mm + concomitant CAL of>2 mm)	Gingival	After collection gingival tissue specimens were thoroughly rinsed with sterile normal saline solution and transferred into Eppendorf tubes containing 5 volumes of a RNA stabilization reagent (RNAlater, Ambion, Austin, TX, USA). Specimens were stored in RNAlater overnight at 4.0 C and thereafter snap-frozen and stored in liquid nitrogen. All further processing occurred simultaneously for gingival …
GSM404149	Sample 4 from patient 56, Unaffected site	Patient 56 gingival tissue sample collected as Unaffected	Healthy (no BoP + PPD of<5 mm + CAL of<3 2 mm	Gingival	After collection gingival tissue specimens were thoroughly rinsed with sterile normal saline solution and transferred into Eppendorf tubes containing 5 volumes of a RNA stabilization reagent (RNAlater, Ambion, Austin, TX, USA). Specimens were stored in RNAlater overnight at 4.0 C and thereafter snap-frozen and stored in liquid nitrogen. All further processing occurred simultaneously for gingival …
GSM404150	Sample 1 from patient 58, Affected site	Patient 58 gingival tissue sample collected as Affected	Diseased (BoP + interproximal PPD of>3 mm + concomitant CAL of>2 mm)	Gingival	After collection gingival tissue specimens were thoroughly rinsed with sterile normal saline solution and transferred into Eppendorf tubes containing 5 volumes of a RNA stabilization reagent (RNAlater, Ambion, Austin, TX, USA). Specimens were stored in RNAlater overnight at 4.0 C and thereafter snap-frozen and stored in liquid nitrogen. All further processing occurred simultaneously for gingival …
GSM404151	Sample 2 from patient 58, Affected site	Patient 58 gingival tissue sample collected as Affected	Diseased (BoP + interproximal PPD of>3 mm + concomitant CAL of>2 mm)	Gingival	After collection gingival tissue specimens were thoroughly rinsed with sterile normal saline solution and transferred into Eppendorf tubes containing 5 volumes of a RNA stabilization reagent (RNAlater, Ambion, Austin, TX, USA). Specimens were stored in RNAlater overnight at 4.0 C and thereafter snap-frozen and stored in liquid nitrogen. All further processing occurred simultaneously for gingival …
GSM404152	Sample 3 from patient 58, Unaffected site	Patient 58 gingival tissue sample collected as Unaffected	Healthy (no BoP + PPD of<5 mm + CAL of<3 2 mm	Gingival	After collection gingival tissue specimens were thoroughly rinsed with sterile normal saline solution and transferred into Eppendorf tubes containing 5 volumes of a RNA stabilization reagent (RNAlater, Ambion, Austin, TX, USA). Specimens were stored in RNAlater overnight at 4.0 C and thereafter snap-frozen and stored in liquid nitrogen. All further processing occurred simultaneously for gingival …
GSM404153	Sample 1 from patient 59, Affected site	Patient 59 gingival tissue sample collected as Affected	Diseased (BoP + interproximal PPD of>3 mm + concomitant CAL of>2 mm)	Gingival	After collection gingival tissue specimens were thoroughly rinsed with sterile normal saline solution and transferred into Eppendorf tubes containing 5 volumes of a RNA stabilization reagent (RNAlater, Ambion, Austin, TX, USA). Specimens were stored in RNAlater overnight at 4.0 C and thereafter snap-frozen and stored in liquid nitrogen. All further processing occurred simultaneously for gingival …
GSM404154	Sample 2 from patient 59, Affected site	Patient 59 gingival tissue sample collected as Affected	Diseased (BoP + interproximal PPD of>3 mm + concomitant CAL of>2 mm)	Gingival	After collection gingival tissue specimens were thoroughly rinsed with sterile normal saline solution and transferred into Eppendorf tubes containing 5 volumes of a RNA stabilization reagent (RNAlater, Ambion, Austin, TX, USA). Specimens were stored in RNAlater overnight at 4.0 C and thereafter snap-frozen and stored in liquid nitrogen. All further processing occurred simultaneously for gingival …
GSM404155	Sample 4 from patient 59, Unaffected site	Patient 59 gingival tissue sample collected as Unaffected	Healthy (no BoP + PPD of<5 mm + CAL of<3 2 mm	Gingival	After collection gingival tissue specimens were thoroughly rinsed with sterile normal saline solution and transferred into Eppendorf tubes containing 5 volumes of a RNA stabilization reagent (RNAlater, Ambion, Austin, TX, USA). Specimens were stored in RNAlater overnight at 4.0 C and thereafter snap-frozen and stored in liquid nitrogen. All further processing occurred simultaneously for gingival …
GSM404156	Sample 1 from patient 60, Affected site	Patient 60 gingival tissue sample collected as Affected	Diseased (BoP + interproximal PPD of>3 mm + concomitant CAL of>2 mm)	Gingival	After collection gingival tissue specimens were thoroughly rinsed with sterile normal saline solution and transferred into Eppendorf tubes containing 5 volumes of a RNA stabilization reagent (RNAlater, Ambion, Austin, TX, USA). Specimens were stored in RNAlater overnight at 4.0 C and thereafter snap-frozen and stored in liquid nitrogen. All further processing occurred simultaneously for gingival …
GSM404157	Sample 2 from patient 60, Affected site	Patient 60 gingival tissue sample collected as Affected	Diseased (BoP + interproximal PPD of>3 mm + concomitant CAL of>2 mm)	Gingival	After collection gingival tissue specimens were thoroughly rinsed with sterile normal saline solution and transferred into Eppendorf tubes containing 5 volumes of a RNA stabilization reagent (RNAlater, Ambion, Austin, TX, USA). Specimens were stored in RNAlater overnight at 4.0 C and thereafter snap-frozen and stored in liquid nitrogen. All further processing occurred simultaneously for gingival …
GSM404158	Sample 1 from patient 61, Affected site	Patient 61 gingival tissue sample collected as Affected	Diseased (BoP + interproximal PPD of>3 mm + concomitant CAL of>2 mm)	Gingival	After collection gingival tissue specimens were thoroughly rinsed with sterile normal saline solution and transferred into Eppendorf tubes containing 5 volumes of a RNA stabilization reagent (RNAlater, Ambion, Austin, TX, USA). Specimens were stored in RNAlater overnight at 4.0 C and thereafter snap-frozen and stored in liquid nitrogen. All further processing occurred simultaneously for gingival …
GSM404159	Sample 2 from patient 61, Affected site	Patient 61 gingival tissue sample collected as Affected	Diseased (BoP + interproximal PPD of>3 mm + concomitant CAL of>2 mm)	Gingival	After collection gingival tissue specimens were thoroughly rinsed with sterile normal saline solution and transferred into Eppendorf tubes containing 5 volumes of a RNA stabilization reagent (RNAlater, Ambion, Austin, TX, USA). Specimens were stored in RNAlater overnight at 4.0 C and thereafter snap-frozen and stored in liquid nitrogen. All further processing occurred simultaneously for gingival …
GSM404160	Sample 4 from patient 61, Unaffected site	Patient 61 gingival tissue sample collected as Unaffected	Healthy (no BoP + PPD of<5 mm + CAL of<3 2 mm	Gingival	After collection gingival tissue specimens were thoroughly rinsed with sterile normal saline solution and transferred into Eppendorf tubes containing 5 volumes of a RNA stabilization reagent (RNAlater, Ambion, Austin, TX, USA). Specimens were stored in RNAlater overnight at 4.0 C and thereafter snap-frozen and stored in liquid nitrogen. All further processing occurred simultaneously for gingival …
GSM404161	Sample 1 from patient 62, Affected site	Patient 62 gingival tissue sample collected as Affected	Diseased (BoP + interproximal PPD of>3 mm + concomitant CAL of>2 mm)	Gingival	After collection gingival tissue specimens were thoroughly rinsed with sterile normal saline solution and transferred into Eppendorf tubes containing 5 volumes of a RNA stabilization reagent (RNAlater, Ambion, Austin, TX, USA). Specimens were stored in RNAlater overnight at 4.0 C and thereafter snap-frozen and stored in liquid nitrogen. All further processing occurred simultaneously for gingival …
GSM404162	Sample 2 from patient 62, Affected site	Patient 62 gingival tissue sample collected as Affected	Diseased (BoP + interproximal PPD of>3 mm + concomitant CAL of>2 mm)	Gingival	After collection gingival tissue specimens were thoroughly rinsed with sterile normal saline solution and transferred into Eppendorf tubes containing 5 volumes of a RNA stabilization reagent (RNAlater, Ambion, Austin, TX, USA). Specimens were stored in RNAlater overnight at 4.0 C and thereafter snap-frozen and stored in liquid nitrogen. All further processing occurred simultaneously for gingival …
GSM404163	Sample 3 from patient 62, Unaffected site	Patient 62 gingival tissue sample collected as Unaffected	Healthy (no BoP + PPD of<5 mm + CAL of<3 2 mm	Gingival	After collection gingival tissue specimens were thoroughly rinsed with sterile normal saline solution and transferred into Eppendorf tubes containing 5 volumes of a RNA stabilization reagent (RNAlater, Ambion, Austin, TX, USA). Specimens were stored in RNAlater overnight at 4.0 C and thereafter snap-frozen and stored in liquid nitrogen. All further processing occurred simultaneously for gingival …
GSM404164	Sample 1 from patient 63, Affected site	Patient 63 gingival tissue sample collected as Affected	Diseased (BoP + interproximal PPD of>3 mm + concomitant CAL of>2 mm)	Gingival	After collection gingival tissue specimens were thoroughly rinsed with sterile normal saline solution and transferred into Eppendorf tubes containing 5 volumes of a RNA stabilization reagent (RNAlater, Ambion, Austin, TX, USA). Specimens were stored in RNAlater overnight at 4.0 C and thereafter snap-frozen and stored in liquid nitrogen. All further processing occurred simultaneously for gingival …
GSM404165	Sample 2 from patient 63, Affected site	Patient 63 gingival tissue sample collected as Affected	Diseased (BoP + interproximal PPD of>3 mm + concomitant CAL of>2 mm)	Gingival	After collection gingival tissue specimens were thoroughly rinsed with sterile normal saline solution and transferred into Eppendorf tubes containing 5 volumes of a RNA stabilization reagent (RNAlater, Ambion, Austin, TX, USA). Specimens were stored in RNAlater overnight at 4.0 C and thereafter snap-frozen and stored in liquid nitrogen. All further processing occurred simultaneously for gingival …
GSM404166	Sample 3 from patient 63, Unaffected site	Patient 63 gingival tissue sample collected as Unaffected	Healthy (no BoP + PPD of<5 mm + CAL of<3 2 mm	Gingival	After collection gingival tissue specimens were thoroughly rinsed with sterile normal saline solution and transferred into Eppendorf tubes containing 5 volumes of a RNA stabilization reagent (RNAlater, Ambion, Austin, TX, USA). Specimens were stored in RNAlater overnight at 4.0 C and thereafter snap-frozen and stored in liquid nitrogen. All further processing occurred simultaneously for gingival …
GSM404167	Sample 1 from patient 64, Affected site	Patient 64 gingival tissue sample collected as Affected	Diseased (BoP + interproximal PPD of>3 mm + concomitant CAL of>2 mm)	Gingival	After collection gingival tissue specimens were thoroughly rinsed with sterile normal saline solution and transferred into Eppendorf tubes containing 5 volumes of a RNA stabilization reagent (RNAlater, Ambion, Austin, TX, USA). Specimens were stored in RNAlater overnight at 4.0 C and thereafter snap-frozen and stored in liquid nitrogen. All further processing occurred simultaneously for gingival …
GSM404168	Sample 2 from patient 64, Affected site	Patient 64 gingival tissue sample collected as Affected	Diseased (BoP + interproximal PPD of>3 mm + concomitant CAL of>2 mm)	Gingival	After collection gingival tissue specimens were thoroughly rinsed with sterile normal saline solution and transferred into Eppendorf tubes containing 5 volumes of a RNA stabilization reagent (RNAlater, Ambion, Austin, TX, USA). Specimens were stored in RNAlater overnight at 4.0 C and thereafter snap-frozen and stored in liquid nitrogen. All further processing occurred simultaneously for gingival …
GSM404169	Sample 3 from patient 64, Unaffected site	Patient 64 gingival tissue sample collected as Unaffected	Healthy (no BoP + PPD of<5 mm + CAL of<3 2 mm	Gingival	After collection gingival tissue specimens were thoroughly rinsed with sterile normal saline solution and transferred into Eppendorf tubes containing 5 volumes of a RNA stabilization reagent (RNAlater, Ambion, Austin, TX, USA). Specimens were stored in RNAlater overnight at 4.0 C and thereafter snap-frozen and stored in liquid nitrogen. All further processing occurred simultaneously for gingival …
GSM404170	Sample 1 from patient 65, Affected site	Patient 65 gingival tissue sample collected as Affected	Diseased (BoP + interproximal PPD of>3 mm + concomitant CAL of>2 mm)	Gingival	After collection gingival tissue specimens were thoroughly rinsed with sterile normal saline solution and transferred into Eppendorf tubes containing 5 volumes of a RNA stabilization reagent (RNAlater, Ambion, Austin, TX, USA). Specimens were stored in RNAlater overnight at 4.0 C and thereafter snap-frozen and stored in liquid nitrogen. All further processing occurred simultaneously for gingival …
GSM404171	Sample 2 from patient 65, Affected site	Patient 65 gingival tissue sample collected as Affected	Diseased (BoP + interproximal PPD of>3 mm + concomitant CAL of>2 mm)	Gingival	After collection gingival tissue specimens were thoroughly rinsed with sterile normal saline solution and transferred into Eppendorf tubes containing 5 volumes of a RNA stabilization reagent (RNAlater, Ambion, Austin, TX, USA). Specimens were stored in RNAlater overnight at 4.0 C and thereafter snap-frozen and stored in liquid nitrogen. All further processing occurred simultaneously for gingival …
GSM404172	Sample 4 from patient 65, Unaffected site	Patient 65 gingival tissue sample collected as Unaffected	Healthy (no BoP + PPD of<5 mm + CAL of<3 2 mm	Gingival	After collection gingival tissue specimens were thoroughly rinsed with sterile normal saline solution and transferred into Eppendorf tubes containing 5 volumes of a RNA stabilization reagent (RNAlater, Ambion, Austin, TX, USA). Specimens were stored in RNAlater overnight at 4.0 C and thereafter snap-frozen and stored in liquid nitrogen. All further processing occurred simultaneously for gingival …
GSM404173	Sample 1 from patient 66, Affected site	Patient 66 gingival tissue sample collected as Affected	Diseased (BoP + interproximal PPD of>3 mm + concomitant CAL of>2 mm)	Gingival	After collection gingival tissue specimens were thoroughly rinsed with sterile normal saline solution and transferred into Eppendorf tubes containing 5 volumes of a RNA stabilization reagent (RNAlater, Ambion, Austin, TX, USA). Specimens were stored in RNAlater overnight at 4.0 C and thereafter snap-frozen and stored in liquid nitrogen. All further processing occurred simultaneously for gingival …
GSM404174	Sample 2 from patient 66, Affected site	Patient 66 gingival tissue sample collected as Affected	Diseased (BoP + interproximal PPD of>3 mm + concomitant CAL of>2 mm)	Gingival	After collection gingival tissue specimens were thoroughly rinsed with sterile normal saline solution and transferred into Eppendorf tubes containing 5 volumes of a RNA stabilization reagent (RNAlater, Ambion, Austin, TX, USA). Specimens were stored in RNAlater overnight at 4.0 C and thereafter snap-frozen and stored in liquid nitrogen. All further processing occurred simultaneously for gingival …
GSM404175	Sample 3 from patient 66, Unaffected site	Patient 66 gingival tissue sample collected as Unaffected	Healthy (no BoP + PPD of<5 mm + CAL of<3 2 mm	Gingival	After collection gingival tissue specimens were thoroughly rinsed with sterile normal saline solution and transferred into Eppendorf tubes containing 5 volumes of a RNA stabilization reagent (RNAlater, Ambion, Austin, TX, USA). Specimens were stored in RNAlater overnight at 4.0 C and thereafter snap-frozen and stored in liquid nitrogen. All further processing occurred simultaneously for gingival …
GSM404176	Sample 1 from patient 67, Affected site	Patient 67 gingival tissue sample collected as Affected	Diseased (BoP + interproximal PPD of>3 mm + concomitant CAL of>2 mm)	Gingival	After collection gingival tissue specimens were thoroughly rinsed with sterile normal saline solution and transferred into Eppendorf tubes containing 5 volumes of a RNA stabilization reagent (RNAlater, Ambion, Austin, TX, USA). Specimens were stored in RNAlater overnight at 4.0 C and thereafter snap-frozen and stored in liquid nitrogen. All further processing occurred simultaneously for gingival …
GSM404177	Sample 2 from patient 67, Affected site	Patient 67 gingival tissue sample collected as Affected	Diseased (BoP + interproximal PPD of>3 mm + concomitant CAL of>2 mm)	Gingival	After collection gingival tissue specimens were thoroughly rinsed with sterile normal saline solution and transferred into Eppendorf tubes containing 5 volumes of a RNA stabilization reagent (RNAlater, Ambion, Austin, TX, USA). Specimens were stored in RNAlater overnight at 4.0 C and thereafter snap-frozen and stored in liquid nitrogen. All further processing occurred simultaneously for gingival …
GSM404178	Sample 1 from patient 68, Affected site	Patient 68 gingival tissue sample collected as Affected	Diseased (BoP + interproximal PPD of>3 mm + concomitant CAL of>2 mm)	Gingival	After collection gingival tissue specimens were thoroughly rinsed with sterile normal saline solution and transferred into Eppendorf tubes containing 5 volumes of a RNA stabilization reagent (RNAlater, Ambion, Austin, TX, USA). Specimens were stored in RNAlater overnight at 4.0 C and thereafter snap-frozen and stored in liquid nitrogen. All further processing occurred simultaneously for gingival …
GSM404179	Sample 2 from patient 68, Affected site	Patient 68 gingival tissue sample collected as Affected	Diseased (BoP + interproximal PPD of>3 mm + concomitant CAL of>2 mm)	Gingival	After collection gingival tissue specimens were thoroughly rinsed with sterile normal saline solution and transferred into Eppendorf tubes containing 5 volumes of a RNA stabilization reagent (RNAlater, Ambion, Austin, TX, USA). Specimens were stored in RNAlater overnight at 4.0 C and thereafter snap-frozen and stored in liquid nitrogen. All further processing occurred simultaneously for gingival …
GSM404180	Sample 3 from patient 68, Unaffected site	Patient 68 gingival tissue sample collected as Unaffected	Healthy (no BoP + PPD of<5 mm + CAL of<3 2 mm	Gingival	After collection gingival tissue specimens were thoroughly rinsed with sterile normal saline solution and transferred into Eppendorf tubes containing 5 volumes of a RNA stabilization reagent (RNAlater, Ambion, Austin, TX, USA). Specimens were stored in RNAlater overnight at 4.0 C and thereafter snap-frozen and stored in liquid nitrogen. All further processing occurred simultaneously for gingival …
GSM404181	Sample 1 from patient 69, Affected site	Patient 69 gingival tissue sample collected as Affected	Diseased (BoP + interproximal PPD of>3 mm + concomitant CAL of>2 mm)	Gingival	After collection gingival tissue specimens were thoroughly rinsed with sterile normal saline solution and transferred into Eppendorf tubes containing 5 volumes of a RNA stabilization reagent (RNAlater, Ambion, Austin, TX, USA). Specimens were stored in RNAlater overnight at 4.0 C and thereafter snap-frozen and stored in liquid nitrogen. All further processing occurred simultaneously for gingival …
GSM404182	Sample 2 from patient 69, Affected site	Patient 69 gingival tissue sample collected as Affected	Diseased (BoP + interproximal PPD of>3 mm + concomitant CAL of>2 mm)	Gingival	After collection gingival tissue specimens were thoroughly rinsed with sterile normal saline solution and transferred into Eppendorf tubes containing 5 volumes of a RNA stabilization reagent (RNAlater, Ambion, Austin, TX, USA). Specimens were stored in RNAlater overnight at 4.0 C and thereafter snap-frozen and stored in liquid nitrogen. All further processing occurred simultaneously for gingival …
GSM404183	Sample 3 from patient 69, Unaffected site	Patient 69 gingival tissue sample collected as Unaffected	Healthy (no BoP + PPD of<5 mm + CAL of<3 2 mm	Gingival	After collection gingival tissue specimens were thoroughly rinsed with sterile normal saline solution and transferred into Eppendorf tubes containing 5 volumes of a RNA stabilization reagent (RNAlater, Ambion, Austin, TX, USA). Specimens were stored in RNAlater overnight at 4.0 C and thereafter snap-frozen and stored in liquid nitrogen. All further processing occurred simultaneously for gingival …
GSM404184	Sample 1 from patient 70, Affected site	Patient 70 gingival tissue sample collected as Affected	Diseased (BoP + interproximal PPD of>3 mm + concomitant CAL of>2 mm)	Gingival	After collection gingival tissue specimens were thoroughly rinsed with sterile normal saline solution and transferred into Eppendorf tubes containing 5 volumes of a RNA stabilization reagent (RNAlater, Ambion, Austin, TX, USA). Specimens were stored in RNAlater overnight at 4.0 C and thereafter snap-frozen and stored in liquid nitrogen. All further processing occurred simultaneously for gingival …
GSM404185	Sample 2 from patient 70, Affected site	Patient 70 gingival tissue sample collected as Affected	Diseased (BoP + interproximal PPD of>3 mm + concomitant CAL of>2 mm)	Gingival	After collection gingival tissue specimens were thoroughly rinsed with sterile normal saline solution and transferred into Eppendorf tubes containing 5 volumes of a RNA stabilization reagent (RNAlater, Ambion, Austin, TX, USA). Specimens were stored in RNAlater overnight at 4.0 C and thereafter snap-frozen and stored in liquid nitrogen. All further processing occurred simultaneously for gingival …
GSM404186	Sample 1 from patient 71, Affected site	Patient 71 gingival tissue sample collected as Affected	Diseased (BoP + interproximal PPD of>3 mm + concomitant CAL of>2 mm)	Gingival	After collection gingival tissue specimens were thoroughly rinsed with sterile normal saline solution and transferred into Eppendorf tubes containing 5 volumes of a RNA stabilization reagent (RNAlater, Ambion, Austin, TX, USA). Specimens were stored in RNAlater overnight at 4.0 C and thereafter snap-frozen and stored in liquid nitrogen. All further processing occurred simultaneously for gingival …
GSM404187	Sample 2 from patient 71, Affected site	Patient 71 gingival tissue sample collected as Affected	Diseased (BoP + interproximal PPD of>3 mm + concomitant CAL of>2 mm)	Gingival	After collection gingival tissue specimens were thoroughly rinsed with sterile normal saline solution and transferred into Eppendorf tubes containing 5 volumes of a RNA stabilization reagent (RNAlater, Ambion, Austin, TX, USA). Specimens were stored in RNAlater overnight at 4.0 C and thereafter snap-frozen and stored in liquid nitrogen. All further processing occurred simultaneously for gingival …
GSM404188	Sample 1 from patient 72, Affected site	Patient 72 gingival tissue sample collected as Affected	Diseased (BoP + interproximal PPD of>3 mm + concomitant CAL of>2 mm)	Gingival	After collection gingival tissue specimens were thoroughly rinsed with sterile normal saline solution and transferred into Eppendorf tubes containing 5 volumes of a RNA stabilization reagent (RNAlater, Ambion, Austin, TX, USA). Specimens were stored in RNAlater overnight at 4.0 C and thereafter snap-frozen and stored in liquid nitrogen. All further processing occurred simultaneously for gingival …
GSM404189	Sample 2 from patient 72, Affected site	Patient 72 gingival tissue sample collected as Affected	Diseased (BoP + interproximal PPD of>3 mm + concomitant CAL of>2 mm)	Gingival	After collection gingival tissue specimens were thoroughly rinsed with sterile normal saline solution and transferred into Eppendorf tubes containing 5 volumes of a RNA stabilization reagent (RNAlater, Ambion, Austin, TX, USA). Specimens were stored in RNAlater overnight at 4.0 C and thereafter snap-frozen and stored in liquid nitrogen. All further processing occurred simultaneously for gingival …
GSM404190	Sample 3 from patient 72, Unaffected site	Patient 72 gingival tissue sample collected as Unaffected	Healthy (no BoP + PPD of<5 mm + CAL of<3 2 mm	Gingival	After collection gingival tissue specimens were thoroughly rinsed with sterile normal saline solution and transferred into Eppendorf tubes containing 5 volumes of a RNA stabilization reagent (RNAlater, Ambion, Austin, TX, USA). Specimens were stored in RNAlater overnight at 4.0 C and thereafter snap-frozen and stored in liquid nitrogen. All further processing occurred simultaneously for gingival …
GSM404191	Sample 1 from patient 73, Affected site	Patient 73 gingival tissue sample collected as Affected	Diseased (BoP + interproximal PPD of>3 mm + concomitant CAL of>2 mm)	Gingival	After collection gingival tissue specimens were thoroughly rinsed with sterile normal saline solution and transferred into Eppendorf tubes containing 5 volumes of a RNA stabilization reagent (RNAlater, Ambion, Austin, TX, USA). Specimens were stored in RNAlater overnight at 4.0 C and thereafter snap-frozen and stored in liquid nitrogen. All further processing occurred simultaneously for gingival …
GSM404192	Sample 2 from patient 73, Affected site	Patient 73 gingival tissue sample collected as Affected	Diseased (BoP + interproximal PPD of>3 mm + concomitant CAL of>2 mm)	Gingival	After collection gingival tissue specimens were thoroughly rinsed with sterile normal saline solution and transferred into Eppendorf tubes containing 5 volumes of a RNA stabilization reagent (RNAlater, Ambion, Austin, TX, USA). Specimens were stored in RNAlater overnight at 4.0 C and thereafter snap-frozen and stored in liquid nitrogen. All further processing occurred simultaneously for gingival …
GSM404193	Sample 1 from patient 74, Affected site	Patient 74 gingival tissue sample collected as Affected	Diseased (BoP + interproximal PPD of>3 mm + concomitant CAL of>2 mm)	Gingival	After collection gingival tissue specimens were thoroughly rinsed with sterile normal saline solution and transferred into Eppendorf tubes containing 5 volumes of a RNA stabilization reagent (RNAlater, Ambion, Austin, TX, USA). Specimens were stored in RNAlater overnight at 4.0 C and thereafter snap-frozen and stored in liquid nitrogen. All further processing occurred simultaneously for gingival …
GSM404194	Sample 2 from patient 74, Affected site	Patient 74 gingival tissue sample collected as Affected	Diseased (BoP + interproximal PPD of>3 mm + concomitant CAL of>2 mm)	Gingival	After collection gingival tissue specimens were thoroughly rinsed with sterile normal saline solution and transferred into Eppendorf tubes containing 5 volumes of a RNA stabilization reagent (RNAlater, Ambion, Austin, TX, USA). Specimens were stored in RNAlater overnight at 4.0 C and thereafter snap-frozen and stored in liquid nitrogen. All further processing occurred simultaneously for gingival …
GSM404195	Sample 3 from patient 74, Unaffected site	Patient 74 gingival tissue sample collected as Unaffected	Healthy (no BoP + PPD of<5 mm + CAL of<3 2 mm	Gingival	After collection gingival tissue specimens were thoroughly rinsed with sterile normal saline solution and transferred into Eppendorf tubes containing 5 volumes of a RNA stabilization reagent (RNAlater, Ambion, Austin, TX, USA). Specimens were stored in RNAlater overnight at 4.0 C and thereafter snap-frozen and stored in liquid nitrogen. All further processing occurred simultaneously for gingival …
GSM404196	Sample 1 from patient 75, Affected site	Patient 75 gingival tissue sample collected as Affected	Diseased (BoP + interproximal PPD of>3 mm + concomitant CAL of>2 mm)	Gingival	After collection gingival tissue specimens were thoroughly rinsed with sterile normal saline solution and transferred into Eppendorf tubes containing 5 volumes of a RNA stabilization reagent (RNAlater, Ambion, Austin, TX, USA). Specimens were stored in RNAlater overnight at 4.0 C and thereafter snap-frozen and stored in liquid nitrogen. All further processing occurred simultaneously for gingival …
GSM404197	Sample 2 from patient 75, Affected site	Patient 75 gingival tissue sample collected as Affected	Diseased (BoP + interproximal PPD of>3 mm + concomitant CAL of>2 mm)	Gingival	After collection gingival tissue specimens were thoroughly rinsed with sterile normal saline solution and transferred into Eppendorf tubes containing 5 volumes of a RNA stabilization reagent (RNAlater, Ambion, Austin, TX, USA). Specimens were stored in RNAlater overnight at 4.0 C and thereafter snap-frozen and stored in liquid nitrogen. All further processing occurred simultaneously for gingival …
GSM404198	Sample 1 from patient 76, Affected site	Patient 76 gingival tissue sample collected as Affected	Diseased (BoP + interproximal PPD of>3 mm + concomitant CAL of>2 mm)	Gingival	After collection gingival tissue specimens were thoroughly rinsed with sterile normal saline solution and transferred into Eppendorf tubes containing 5 volumes of a RNA stabilization reagent (RNAlater, Ambion, Austin, TX, USA). Specimens were stored in RNAlater overnight at 4.0 C and thereafter snap-frozen and stored in liquid nitrogen. All further processing occurred simultaneously for gingival …
GSM404199	Sample 2 from patient 76, Affected site	Patient 76 gingival tissue sample collected as Affected	Diseased (BoP + interproximal PPD of>3 mm + concomitant CAL of>2 mm)	Gingival	After collection gingival tissue specimens were thoroughly rinsed with sterile normal saline solution and transferred into Eppendorf tubes containing 5 volumes of a RNA stabilization reagent (RNAlater, Ambion, Austin, TX, USA). Specimens were stored in RNAlater overnight at 4.0 C and thereafter snap-frozen and stored in liquid nitrogen. All further processing occurred simultaneously for gingival …
GSM404200	Sample 3 from patient 76, Unaffected site	Patient 76 gingival tissue sample collected as Unaffected	Healthy (no BoP + PPD of<5 mm + CAL of<3 2 mm	Gingival	After collection gingival tissue specimens were thoroughly rinsed with sterile normal saline solution and transferred into Eppendorf tubes containing 5 volumes of a RNA stabilization reagent (RNAlater, Ambion, Austin, TX, USA). Specimens were stored in RNAlater overnight at 4.0 C and thereafter snap-frozen and stored in liquid nitrogen. All further processing occurred simultaneously for gingival …
GSM404201	Sample 1 from patient 77, Affected site	Patient 77 gingival tissue sample collected as Affected	Diseased (BoP + interproximal PPD of>3 mm + concomitant CAL of>2 mm)	Gingival	After collection gingival tissue specimens were thoroughly rinsed with sterile normal saline solution and transferred into Eppendorf tubes containing 5 volumes of a RNA stabilization reagent (RNAlater, Ambion, Austin, TX, USA). Specimens were stored in RNAlater overnight at 4.0 C and thereafter snap-frozen and stored in liquid nitrogen. All further processing occurred simultaneously for gingival …
GSM404202	Sample 2 from patient 77, Affected site	Patient 77 gingival tissue sample collected as Affected	Diseased (BoP + interproximal PPD of>3 mm + concomitant CAL of>2 mm)	Gingival	After collection gingival tissue specimens were thoroughly rinsed with sterile normal saline solution and transferred into Eppendorf tubes containing 5 volumes of a RNA stabilization reagent (RNAlater, Ambion, Austin, TX, USA). Specimens were stored in RNAlater overnight at 4.0 C and thereafter snap-frozen and stored in liquid nitrogen. All further processing occurred simultaneously for gingival …
GSM404203	Sample 3 from patient 77, Unaffected site	Patient 77 gingival tissue sample collected as Unaffected	Healthy (no BoP + PPD of<5 mm + CAL of<3 2 mm	Gingival	After collection gingival tissue specimens were thoroughly rinsed with sterile normal saline solution and transferred into Eppendorf tubes containing 5 volumes of a RNA stabilization reagent (RNAlater, Ambion, Austin, TX, USA). Specimens were stored in RNAlater overnight at 4.0 C and thereafter snap-frozen and stored in liquid nitrogen. All further processing occurred simultaneously for gingival …
GSM404204	Sample 1 from patient 78, Affected site	Patient 78 gingival tissue sample collected as Affected	Diseased (BoP + interproximal PPD of>3 mm + concomitant CAL of>2 mm)	Gingival	After collection gingival tissue specimens were thoroughly rinsed with sterile normal saline solution and transferred into Eppendorf tubes containing 5 volumes of a RNA stabilization reagent (RNAlater, Ambion, Austin, TX, USA). Specimens were stored in RNAlater overnight at 4.0 C and thereafter snap-frozen and stored in liquid nitrogen. All further processing occurred simultaneously for gingival …
GSM404205	Sample 2 from patient 78, Affected site	Patient 78 gingival tissue sample collected as Affected	Diseased (BoP + interproximal PPD of>3 mm + concomitant CAL of>2 mm)	Gingival	After collection gingival tissue specimens were thoroughly rinsed with sterile normal saline solution and transferred into Eppendorf tubes containing 5 volumes of a RNA stabilization reagent (RNAlater, Ambion, Austin, TX, USA). Specimens were stored in RNAlater overnight at 4.0 C and thereafter snap-frozen and stored in liquid nitrogen. All further processing occurred simultaneously for gingival …
GSM404206	Sample 3 from patient 78, Unaffected site	Patient 78 gingival tissue sample collected as Unaffected	Healthy (no BoP + PPD of<5 mm + CAL of<3 2 mm	Gingival	After collection gingival tissue specimens were thoroughly rinsed with sterile normal saline solution and transferred into Eppendorf tubes containing 5 volumes of a RNA stabilization reagent (RNAlater, Ambion, Austin, TX, USA). Specimens were stored in RNAlater overnight at 4.0 C and thereafter snap-frozen and stored in liquid nitrogen. All further processing occurred simultaneously for gingival …
GSM404207	Sample 1 from patient 80, Affected site	Patient 80 gingival tissue sample collected as Affected	Diseased (BoP + interproximal PPD of>3 mm + concomitant CAL of>2 mm)	Gingival	After collection gingival tissue specimens were thoroughly rinsed with sterile normal saline solution and transferred into Eppendorf tubes containing 5 volumes of a RNA stabilization reagent (RNAlater, Ambion, Austin, TX, USA). Specimens were stored in RNAlater overnight at 4.0 C and thereafter snap-frozen and stored in liquid nitrogen. All further processing occurred simultaneously for gingival …
GSM404208	Sample 2 from patient 80, Affected site	Patient 80 gingival tissue sample collected as Affected	Diseased (BoP + interproximal PPD of>3 mm + concomitant CAL of>2 mm)	Gingival	After collection gingival tissue specimens were thoroughly rinsed with sterile normal saline solution and transferred into Eppendorf tubes containing 5 volumes of a RNA stabilization reagent (RNAlater, Ambion, Austin, TX, USA). Specimens were stored in RNAlater overnight at 4.0 C and thereafter snap-frozen and stored in liquid nitrogen. All further processing occurred simultaneously for gingival …
GSM404209	Sample 1 from patient 81, Affected site	Patient 81 gingival tissue sample collected as Affected	Diseased (BoP + interproximal PPD of>3 mm + concomitant CAL of>2 mm)	Gingival	After collection gingival tissue specimens were thoroughly rinsed with sterile normal saline solution and transferred into Eppendorf tubes containing 5 volumes of a RNA stabilization reagent (RNAlater, Ambion, Austin, TX, USA). Specimens were stored in RNAlater overnight at 4.0 C and thereafter snap-frozen and stored in liquid nitrogen. All further processing occurred simultaneously for gingival …
GSM404210	Sample 2 from patient 81, Affected site	Patient 81 gingival tissue sample collected as Affected	Diseased (BoP + interproximal PPD of>3 mm + concomitant CAL of>2 mm)	Gingival	After collection gingival tissue specimens were thoroughly rinsed with sterile normal saline solution and transferred into Eppendorf tubes containing 5 volumes of a RNA stabilization reagent (RNAlater, Ambion, Austin, TX, USA). Specimens were stored in RNAlater overnight at 4.0 C and thereafter snap-frozen and stored in liquid nitrogen. All further processing occurred simultaneously for gingival …
GSM404211	Sample 1 from patient 82, Affected site	Patient 82 gingival tissue sample collected as Affected	Diseased (BoP + interproximal PPD of>3 mm + concomitant CAL of>2 mm)	Gingival	After collection gingival tissue specimens were thoroughly rinsed with sterile normal saline solution and transferred into Eppendorf tubes containing 5 volumes of a RNA stabilization reagent (RNAlater, Ambion, Austin, TX, USA). Specimens were stored in RNAlater overnight at 4.0 C and thereafter snap-frozen and stored in liquid nitrogen. All further processing occurred simultaneously for gingival …
GSM404212	Sample 2 from patient 82, Affected site	Patient 82 gingival tissue sample collected as Affected	Diseased (BoP + interproximal PPD of>3 mm + concomitant CAL of>2 mm)	Gingival	After collection gingival tissue specimens were thoroughly rinsed with sterile normal saline solution and transferred into Eppendorf tubes containing 5 volumes of a RNA stabilization reagent (RNAlater, Ambion, Austin, TX, USA). Specimens were stored in RNAlater overnight at 4.0 C and thereafter snap-frozen and stored in liquid nitrogen. All further processing occurred simultaneously for gingival …
GSM404213	Sample 1 from patient 83, Affected site	Patient 83 gingival tissue sample collected as Affected	Diseased (BoP + interproximal PPD of>3 mm + concomitant CAL of>2 mm)	Gingival	After collection gingival tissue specimens were thoroughly rinsed with sterile normal saline solution and transferred into Eppendorf tubes containing 5 volumes of a RNA stabilization reagent (RNAlater, Ambion, Austin, TX, USA). Specimens were stored in RNAlater overnight at 4.0 C and thereafter snap-frozen and stored in liquid nitrogen. All further processing occurred simultaneously for gingival …
GSM404214	Sample 2 from patient 83, Affected site	Patient 83 gingival tissue sample collected as Affected	Diseased (BoP + interproximal PPD of>3 mm + concomitant CAL of>2 mm)	Gingival	After collection gingival tissue specimens were thoroughly rinsed with sterile normal saline solution and transferred into Eppendorf tubes containing 5 volumes of a RNA stabilization reagent (RNAlater, Ambion, Austin, TX, USA). Specimens were stored in RNAlater overnight at 4.0 C and thereafter snap-frozen and stored in liquid nitrogen. All further processing occurred simultaneously for gingival …
GSM404215	Sample 3 from patient 83, Unaffected site	Patient 83 gingival tissue sample collected as Unaffected	Healthy (no BoP + PPD of<5 mm + CAL of<3 2 mm	Gingival	After collection gingival tissue specimens were thoroughly rinsed with sterile normal saline solution and transferred into Eppendorf tubes containing 5 volumes of a RNA stabilization reagent (RNAlater, Ambion, Austin, TX, USA). Specimens were stored in RNAlater overnight at 4.0 C and thereafter snap-frozen and stored in liquid nitrogen. All further processing occurred simultaneously for gingival …
GSM404216	Sample 1 from patient 84, Affected site	Patient 84 gingival tissue sample collected as Affected	Diseased (BoP + interproximal PPD of>3 mm + concomitant CAL of>2 mm)	Gingival	After collection gingival tissue specimens were thoroughly rinsed with sterile normal saline solution and transferred into Eppendorf tubes containing 5 volumes of a RNA stabilization reagent (RNAlater, Ambion, Austin, TX, USA). Specimens were stored in RNAlater overnight at 4.0 C and thereafter snap-frozen and stored in liquid nitrogen. All further processing occurred simultaneously for gingival …
GSM404217	Sample 2 from patient 84, Affected site	Patient 84 gingival tissue sample collected as Affected	Diseased (BoP + interproximal PPD of>3 mm + concomitant CAL of>2 mm)	Gingival	After collection gingival tissue specimens were thoroughly rinsed with sterile normal saline solution and transferred into Eppendorf tubes containing 5 volumes of a RNA stabilization reagent (RNAlater, Ambion, Austin, TX, USA). Specimens were stored in RNAlater overnight at 4.0 C and thereafter snap-frozen and stored in liquid nitrogen. All further processing occurred simultaneously for gingival …
GSM404218	Sample 1 from patient 85, Affected site	Patient 85 gingival tissue sample collected as Affected	Diseased (BoP + interproximal PPD of>3 mm + concomitant CAL of>2 mm)	Gingival	After collection gingival tissue specimens were thoroughly rinsed with sterile normal saline solution and transferred into Eppendorf tubes containing 5 volumes of a RNA stabilization reagent (RNAlater, Ambion, Austin, TX, USA). Specimens were stored in RNAlater overnight at 4.0 C and thereafter snap-frozen and stored in liquid nitrogen. All further processing occurred simultaneously for gingival …
GSM404219	Sample 2 from patient 85, Affected site	Patient 85 gingival tissue sample collected as Affected	Diseased (BoP + interproximal PPD of>3 mm + concomitant CAL of>2 mm)	Gingival	After collection gingival tissue specimens were thoroughly rinsed with sterile normal saline solution and transferred into Eppendorf tubes containing 5 volumes of a RNA stabilization reagent (RNAlater, Ambion, Austin, TX, USA). Specimens were stored in RNAlater overnight at 4.0 C and thereafter snap-frozen and stored in liquid nitrogen. All further processing occurred simultaneously for gingival …
GSM404220	Sample 1 from patient 86, Affected site	Patient 86 gingival tissue sample collected as Affected	Diseased (BoP + interproximal PPD of>3 mm + concomitant CAL of>2 mm)	Gingival	After collection gingival tissue specimens were thoroughly rinsed with sterile normal saline solution and transferred into Eppendorf tubes containing 5 volumes of a RNA stabilization reagent (RNAlater, Ambion, Austin, TX, USA). Specimens were stored in RNAlater overnight at 4.0 C and thereafter snap-frozen and stored in liquid nitrogen. All further processing occurred simultaneously for gingival …
GSM404221	Sample 2 from patient 86, Affected site	Patient 86 gingival tissue sample collected as Affected	Diseased (BoP + interproximal PPD of>3 mm + concomitant CAL of>2 mm)	Gingival	After collection gingival tissue specimens were thoroughly rinsed with sterile normal saline solution and transferred into Eppendorf tubes containing 5 volumes of a RNA stabilization reagent (RNAlater, Ambion, Austin, TX, USA). Specimens were stored in RNAlater overnight at 4.0 C and thereafter snap-frozen and stored in liquid nitrogen. All further processing occurred simultaneously for gingival …
GSM404222	Sample 3 from patient 86, Unaffected site	Patient 86 gingival tissue sample collected as Unaffected	Healthy (no BoP + PPD of<5 mm + CAL of<3 2 mm	Gingival	After collection gingival tissue specimens were thoroughly rinsed with sterile normal saline solution and transferred into Eppendorf tubes containing 5 volumes of a RNA stabilization reagent (RNAlater, Ambion, Austin, TX, USA). Specimens were stored in RNAlater overnight at 4.0 C and thereafter snap-frozen and stored in liquid nitrogen. All further processing occurred simultaneously for gingival …
GSM404223	Sample 1 from patient 87, Affected site	Patient 87 gingival tissue sample collected as Affected	Diseased (BoP + interproximal PPD of>3 mm + concomitant CAL of>2 mm)	Gingival	After collection gingival tissue specimens were thoroughly rinsed with sterile normal saline solution and transferred into Eppendorf tubes containing 5 volumes of a RNA stabilization reagent (RNAlater, Ambion, Austin, TX, USA). Specimens were stored in RNAlater overnight at 4.0 C and thereafter snap-frozen and stored in liquid nitrogen. All further processing occurred simultaneously for gingival …
GSM404224	Sample 2 from patient 87, Affected site	Patient 87 gingival tissue sample collected as Affected	Diseased (BoP + interproximal PPD of>3 mm + concomitant CAL of>2 mm)	Gingival	After collection gingival tissue specimens were thoroughly rinsed with sterile normal saline solution and transferred into Eppendorf tubes containing 5 volumes of a RNA stabilization reagent (RNAlater, Ambion, Austin, TX, USA). Specimens were stored in RNAlater overnight at 4.0 C and thereafter snap-frozen and stored in liquid nitrogen. All further processing occurred simultaneously for gingival …
GSM404225	Sample 3 from patient 87, Unaffected site	Patient 87 gingival tissue sample collected as Unaffected	Healthy (no BoP + PPD of<5 mm + CAL of<3 2 mm	Gingival	After collection gingival tissue specimens were thoroughly rinsed with sterile normal saline solution and transferred into Eppendorf tubes containing 5 volumes of a RNA stabilization reagent (RNAlater, Ambion, Austin, TX, USA). Specimens were stored in RNAlater overnight at 4.0 C and thereafter snap-frozen and stored in liquid nitrogen. All further processing occurred simultaneously for gingival …
GSM404226	Sample 1 from patient 88, Affected site	Patient 88 gingival tissue sample collected as Affected	Diseased (BoP + interproximal PPD of>3 mm + concomitant CAL of>2 mm)	Gingival	After collection gingival tissue specimens were thoroughly rinsed with sterile normal saline solution and transferred into Eppendorf tubes containing 5 volumes of a RNA stabilization reagent (RNAlater, Ambion, Austin, TX, USA). Specimens were stored in RNAlater overnight at 4.0 C and thereafter snap-frozen and stored in liquid nitrogen. All further processing occurred simultaneously for gingival …
GSM404227	Sample 2 from patient 88, Affected site	Patient 88 gingival tissue sample collected as Affected	Diseased (BoP + interproximal PPD of>3 mm + concomitant CAL of>2 mm)	Gingival	After collection gingival tissue specimens were thoroughly rinsed with sterile normal saline solution and transferred into Eppendorf tubes containing 5 volumes of a RNA stabilization reagent (RNAlater, Ambion, Austin, TX, USA). Specimens were stored in RNAlater overnight at 4.0 C and thereafter snap-frozen and stored in liquid nitrogen. All further processing occurred simultaneously for gingival …
GSM404228	Sample 3 from patient 88, Unaffected site	Patient 88 gingival tissue sample collected as Unaffected	Healthy (no BoP + PPD of<5 mm + CAL of<3 2 mm	Gingival	After collection gingival tissue specimens were thoroughly rinsed with sterile normal saline solution and transferred into Eppendorf tubes containing 5 volumes of a RNA stabilization reagent (RNAlater, Ambion, Austin, TX, USA). Specimens were stored in RNAlater overnight at 4.0 C and thereafter snap-frozen and stored in liquid nitrogen. All further processing occurred simultaneously for gingival …
GSM404229	Sample 1 from patient 89, Affected site	Patient 89 gingival tissue sample collected as Affected	Diseased (BoP + interproximal PPD of>3 mm + concomitant CAL of>2 mm)	Gingival	After collection gingival tissue specimens were thoroughly rinsed with sterile normal saline solution and transferred into Eppendorf tubes containing 5 volumes of a RNA stabilization reagent (RNAlater, Ambion, Austin, TX, USA). Specimens were stored in RNAlater overnight at 4.0 C and thereafter snap-frozen and stored in liquid nitrogen. All further processing occurred simultaneously for gingival …
GSM404230	Sample 2 from patient 89, Affected site	Patient 89 gingival tissue sample collected as Affected	Diseased (BoP + interproximal PPD of>3 mm + concomitant CAL of>2 mm)	Gingival	After collection gingival tissue specimens were thoroughly rinsed with sterile normal saline solution and transferred into Eppendorf tubes containing 5 volumes of a RNA stabilization reagent (RNAlater, Ambion, Austin, TX, USA). Specimens were stored in RNAlater overnight at 4.0 C and thereafter snap-frozen and stored in liquid nitrogen. All further processing occurred simultaneously for gingival …
GSM404231	Sample 1 from patient 90, Affected site	Patient 90 gingival tissue sample collected as Affected	Diseased (BoP + interproximal PPD of>3 mm + concomitant CAL of>2 mm)	Gingival	After collection gingival tissue specimens were thoroughly rinsed with sterile normal saline solution and transferred into Eppendorf tubes containing 5 volumes of a RNA stabilization reagent (RNAlater, Ambion, Austin, TX, USA). Specimens were stored in RNAlater overnight at 4.0 C and thereafter snap-frozen and stored in liquid nitrogen. All further processing occurred simultaneously for gingival …
GSM404232	Sample 2 from patient 90, Affected site	Patient 90 gingival tissue sample collected as Affected	Diseased (BoP + interproximal PPD of>3 mm + concomitant CAL of>2 mm)	Gingival	After collection gingival tissue specimens were thoroughly rinsed with sterile normal saline solution and transferred into Eppendorf tubes containing 5 volumes of a RNA stabilization reagent (RNAlater, Ambion, Austin, TX, USA). Specimens were stored in RNAlater overnight at 4.0 C and thereafter snap-frozen and stored in liquid nitrogen. All further processing occurred simultaneously for gingival …
GSM404233	Sample 3 from patient 90, Unaffected site	Patient 90 gingival tissue sample collected as Unaffected	Healthy (no BoP + PPD of<5 mm + CAL of<3 2 mm	Gingival	After collection gingival tissue specimens were thoroughly rinsed with sterile normal saline solution and transferred into Eppendorf tubes containing 5 volumes of a RNA stabilization reagent (RNAlater, Ambion, Austin, TX, USA). Specimens were stored in RNAlater overnight at 4.0 C and thereafter snap-frozen and stored in liquid nitrogen. All further processing occurred simultaneously for gingival …
GSM404234	Sample 1 from patient 91, Affected site	Patient 91 gingival tissue sample collected as Affected	Diseased (BoP + interproximal PPD of>3 mm + concomitant CAL of>2 mm)	Gingival	After collection gingival tissue specimens were thoroughly rinsed with sterile normal saline solution and transferred into Eppendorf tubes containing 5 volumes of a RNA stabilization reagent (RNAlater, Ambion, Austin, TX, USA). Specimens were stored in RNAlater overnight at 4.0 C and thereafter snap-frozen and stored in liquid nitrogen. All further processing occurred simultaneously for gingival …
GSM404235	Sample 2 from patient 91, Affected site	Patient 91 gingival tissue sample collected as Affected	Diseased (BoP + interproximal PPD of>3 mm + concomitant CAL of>2 mm)	Gingival	After collection gingival tissue specimens were thoroughly rinsed with sterile normal saline solution and transferred into Eppendorf tubes containing 5 volumes of a RNA stabilization reagent (RNAlater, Ambion, Austin, TX, USA). Specimens were stored in RNAlater overnight at 4.0 C and thereafter snap-frozen and stored in liquid nitrogen. All further processing occurred simultaneously for gingival …
GSM404236	Sample 3 from patient 91, Unaffected site	Patient 91 gingival tissue sample collected as Unaffected	Healthy (no BoP + PPD of<5 mm + CAL of<3 2 mm	Gingival	After collection gingival tissue specimens were thoroughly rinsed with sterile normal saline solution and transferred into Eppendorf tubes containing 5 volumes of a RNA stabilization reagent (RNAlater, Ambion, Austin, TX, USA). Specimens were stored in RNAlater overnight at 4.0 C and thereafter snap-frozen and stored in liquid nitrogen. All further processing occurred simultaneously for gingival …
GSM404237	Sample 1 from patient 92, Affected site	Patient 92 gingival tissue sample collected as Affected	Diseased (BoP + interproximal PPD of>3 mm + concomitant CAL of>2 mm)	Gingival	After collection gingival tissue specimens were thoroughly rinsed with sterile normal saline solution and transferred into Eppendorf tubes containing 5 volumes of a RNA stabilization reagent (RNAlater, Ambion, Austin, TX, USA). Specimens were stored in RNAlater overnight at 4.0 C and thereafter snap-frozen and stored in liquid nitrogen. All further processing occurred simultaneously for gingival …
GSM404238	Sample 2 from patient 92, Affected site	Patient 92 gingival tissue sample collected as Affected	Diseased (BoP + interproximal PPD of>3 mm + concomitant CAL of>2 mm)	Gingival	After collection gingival tissue specimens were thoroughly rinsed with sterile normal saline solution and transferred into Eppendorf tubes containing 5 volumes of a RNA stabilization reagent (RNAlater, Ambion, Austin, TX, USA). Specimens were stored in RNAlater overnight at 4.0 C and thereafter snap-frozen and stored in liquid nitrogen. All further processing occurred simultaneously for gingival …
GSM404239	Sample 3 from patient 92, Unaffected site	Patient 92 gingival tissue sample collected as Unaffected	Healthy (no BoP + PPD of<5 mm + CAL of<3 2 mm	Gingival	After collection gingival tissue specimens were thoroughly rinsed with sterile normal saline solution and transferred into Eppendorf tubes containing 5 volumes of a RNA stabilization reagent (RNAlater, Ambion, Austin, TX, USA). Specimens were stored in RNAlater overnight at 4.0 C and thereafter snap-frozen and stored in liquid nitrogen. All further processing occurred simultaneously for gingival …
GSM404240	Sample 1 from patient 93, Affected site	Patient 93 gingival tissue sample collected as Affected	Diseased (BoP + interproximal PPD of>3 mm + concomitant CAL of>2 mm)	Gingival	After collection gingival tissue specimens were thoroughly rinsed with sterile normal saline solution and transferred into Eppendorf tubes containing 5 volumes of a RNA stabilization reagent (RNAlater, Ambion, Austin, TX, USA). Specimens were stored in RNAlater overnight at 4.0 C and thereafter snap-frozen and stored in liquid nitrogen. All further processing occurred simultaneously for gingival …
GSM404241	Sample 2 from patient 93, Affected site	Patient 93 gingival tissue sample collected as Affected	Diseased (BoP + interproximal PPD of>3 mm + concomitant CAL of>2 mm)	Gingival	After collection gingival tissue specimens were thoroughly rinsed with sterile normal saline solution and transferred into Eppendorf tubes containing 5 volumes of a RNA stabilization reagent (RNAlater, Ambion, Austin, TX, USA). Specimens were stored in RNAlater overnight at 4.0 C and thereafter snap-frozen and stored in liquid nitrogen. All further processing occurred simultaneously for gingival …
GSM404242	Sample 3 from patient 93, Unaffected site	Patient 93 gingival tissue sample collected as Unaffected	Healthy (no BoP + PPD of<5 mm + CAL of<3 2 mm	Gingival	After collection gingival tissue specimens were thoroughly rinsed with sterile normal saline solution and transferred into Eppendorf tubes containing 5 volumes of a RNA stabilization reagent (RNAlater, Ambion, Austin, TX, USA). Specimens were stored in RNAlater overnight at 4.0 C and thereafter snap-frozen and stored in liquid nitrogen. All further processing occurred simultaneously for gingival …
GSM404243	Sample 1 from patient 94, Affected site	Patient 94 gingival tissue sample collected as Affected	Diseased (BoP + interproximal PPD of>3 mm + concomitant CAL of>2 mm)	Gingival	After collection gingival tissue specimens were thoroughly rinsed with sterile normal saline solution and transferred into Eppendorf tubes containing 5 volumes of a RNA stabilization reagent (RNAlater, Ambion, Austin, TX, USA). Specimens were stored in RNAlater overnight at 4.0 C and thereafter snap-frozen and stored in liquid nitrogen. All further processing occurred simultaneously for gingival …
GSM404244	Sample 2 from patient 94, Affected site	Patient 94 gingival tissue sample collected as Affected	Diseased (BoP + interproximal PPD of>3 mm + concomitant CAL of>2 mm)	Gingival	After collection gingival tissue specimens were thoroughly rinsed with sterile normal saline solution and transferred into Eppendorf tubes containing 5 volumes of a RNA stabilization reagent (RNAlater, Ambion, Austin, TX, USA). Specimens were stored in RNAlater overnight at 4.0 C and thereafter snap-frozen and stored in liquid nitrogen. All further processing occurred simultaneously for gingival …
GSM404245	Sample 3 from patient 94, Unaffected site	Patient 94 gingival tissue sample collected as Unaffected	Healthy (no BoP + PPD of<5 mm + CAL of<3 2 mm	Gingival	After collection gingival tissue specimens were thoroughly rinsed with sterile normal saline solution and transferred into Eppendorf tubes containing 5 volumes of a RNA stabilization reagent (RNAlater, Ambion, Austin, TX, USA). Specimens were stored in RNAlater overnight at 4.0 C and thereafter snap-frozen and stored in liquid nitrogen. All further processing occurred simultaneously for gingival …
GSM404246	Sample 1 from patient 95, Affected site	Patient 95 gingival tissue sample collected as Affected	Diseased (BoP + interproximal PPD of>3 mm + concomitant CAL of>2 mm)	Gingival	After collection gingival tissue specimens were thoroughly rinsed with sterile normal saline solution and transferred into Eppendorf tubes containing 5 volumes of a RNA stabilization reagent (RNAlater, Ambion, Austin, TX, USA). Specimens were stored in RNAlater overnight at 4.0 C and thereafter snap-frozen and stored in liquid nitrogen. All further processing occurred simultaneously for gingival …
GSM404247	Sample 2 from patient 95, Affected site	Patient 95 gingival tissue sample collected as Affected	Diseased (BoP + interproximal PPD of>3 mm + concomitant CAL of>2 mm)	Gingival	After collection gingival tissue specimens were thoroughly rinsed with sterile normal saline solution and transferred into Eppendorf tubes containing 5 volumes of a RNA stabilization reagent (RNAlater, Ambion, Austin, TX, USA). Specimens were stored in RNAlater overnight at 4.0 C and thereafter snap-frozen and stored in liquid nitrogen. All further processing occurred simultaneously for gingival …
GSM404248	Sample 3 from patient 95, Unaffected site	Patient 95 gingival tissue sample collected as Unaffected	Healthy (no BoP + PPD of<5 mm + CAL of<3 2 mm	Gingival	After collection gingival tissue specimens were thoroughly rinsed with sterile normal saline solution and transferred into Eppendorf tubes containing 5 volumes of a RNA stabilization reagent (RNAlater, Ambion, Austin, TX, USA). Specimens were stored in RNAlater overnight at 4.0 C and thereafter snap-frozen and stored in liquid nitrogen. All further processing occurred simultaneously for gingival …
GSM404249	Sample 1 from patient 98, Affected site	Patient 98 gingival tissue sample collected as Affected	Diseased (BoP + interproximal PPD of>3 mm + concomitant CAL of>2 mm)	Gingival	After collection gingival tissue specimens were thoroughly rinsed with sterile normal saline solution and transferred into Eppendorf tubes containing 5 volumes of a RNA stabilization reagent (RNAlater, Ambion, Austin, TX, USA). Specimens were stored in RNAlater overnight at 4.0 C and thereafter snap-frozen and stored in liquid nitrogen. All further processing occurred simultaneously for gingival …
GSM404250	Sample 2 from patient 98, Affected site	Patient 98 gingival tissue sample collected as Affected	Diseased (BoP + interproximal PPD of>3 mm + concomitant CAL of>2 mm)	Gingival	After collection gingival tissue specimens were thoroughly rinsed with sterile normal saline solution and transferred into Eppendorf tubes containing 5 volumes of a RNA stabilization reagent (RNAlater, Ambion, Austin, TX, USA). Specimens were stored in RNAlater overnight at 4.0 C and thereafter snap-frozen and stored in liquid nitrogen. All further processing occurred simultaneously for gingival …
GSM404251	Sample 3 from patient 98, Unaffected site	Patient 98 gingival tissue sample collected as Unaffected	Healthy (no BoP + PPD of<5 mm + CAL of<3 2 mm	Gingival	After collection gingival tissue specimens were thoroughly rinsed with sterile normal saline solution and transferred into Eppendorf tubes containing 5 volumes of a RNA stabilization reagent (RNAlater, Ambion, Austin, TX, USA). Specimens were stored in RNAlater overnight at 4.0 C and thereafter snap-frozen and stored in liquid nitrogen. All further processing occurred simultaneously for gingival …
GSM404252	Sample 1 from patient 99, Affected site	Patient 99 gingival tissue sample collected as Affected	Diseased (BoP + interproximal PPD of>3 mm + concomitant CAL of>2 mm)	Gingival	After collection gingival tissue specimens were thoroughly rinsed with sterile normal saline solution and transferred into Eppendorf tubes containing 5 volumes of a RNA stabilization reagent (RNAlater, Ambion, Austin, TX, USA). Specimens were stored in RNAlater overnight at 4.0 C and thereafter snap-frozen and stored in liquid nitrogen. All further processing occurred simultaneously for gingival …
GSM404253	Sample 2 from patient 99, Affected site	Patient 99 gingival tissue sample collected as Affected	Diseased (BoP + interproximal PPD of>3 mm + concomitant CAL of>2 mm)	Gingival	After collection gingival tissue specimens were thoroughly rinsed with sterile normal saline solution and transferred into Eppendorf tubes containing 5 volumes of a RNA stabilization reagent (RNAlater, Ambion, Austin, TX, USA). Specimens were stored in RNAlater overnight at 4.0 C and thereafter snap-frozen and stored in liquid nitrogen. All further processing occurred simultaneously for gingival …
GSM404254	Sample 1 from patient 100, Affected site	Patient 100 gingival tissue sample collected as Affected	Diseased (BoP + interproximal PPD of>3 mm + concomitant CAL of>2 mm)	Gingival	After collection gingival tissue specimens were thoroughly rinsed with sterile normal saline solution and transferred into Eppendorf tubes containing 5 volumes of a RNA stabilization reagent (RNAlater, Ambion, Austin, TX, USA). Specimens were stored in RNAlater overnight at 4.0 C and thereafter snap-frozen and stored in liquid nitrogen. All further processing occurred simultaneously for gingival …
GSM404255	Sample 2 from patient 100, Affected site	Patient 100 gingival tissue sample collected as Affected	Diseased (BoP + interproximal PPD of>3 mm + concomitant CAL of>2 mm)	Gingival	After collection gingival tissue specimens were thoroughly rinsed with sterile normal saline solution and transferred into Eppendorf tubes containing 5 volumes of a RNA stabilization reagent (RNAlater, Ambion, Austin, TX, USA). Specimens were stored in RNAlater overnight at 4.0 C and thereafter snap-frozen and stored in liquid nitrogen. All further processing occurred simultaneously for gingival …
GSM404256	Sample 2 from patient 101, Affected site	Patient 101 gingival tissue sample collected as Affected	Diseased (BoP + interproximal PPD of>3 mm + concomitant CAL of>2 mm)	Gingival	After collection gingival tissue specimens were thoroughly rinsed with sterile normal saline solution and transferred into Eppendorf tubes containing 5 volumes of a RNA stabilization reagent (RNAlater, Ambion, Austin, TX, USA). Specimens were stored in RNAlater overnight at 4.0 C and thereafter snap-frozen and stored in liquid nitrogen. All further processing occurred simultaneously for gingival …
GSM404257	Sample 3 from patient 101, Affected site	Patient 101 gingival tissue sample collected as Affected	Diseased (BoP + interproximal PPD of>3 mm + concomitant CAL of>2 mm)	Gingival	After collection gingival tissue specimens were thoroughly rinsed with sterile normal saline solution and transferred into Eppendorf tubes containing 5 volumes of a RNA stabilization reagent (RNAlater, Ambion, Austin, TX, USA). Specimens were stored in RNAlater overnight at 4.0 C and thereafter snap-frozen and stored in liquid nitrogen. All further processing occurred simultaneously for gingival …
GSM404258	Sample 1 from patient 102, Affected site	Patient 102 gingival tissue sample collected as Affected	Diseased (BoP + interproximal PPD of>3 mm + concomitant CAL of>2 mm)	Gingival	After collection gingival tissue specimens were thoroughly rinsed with sterile normal saline solution and transferred into Eppendorf tubes containing 5 volumes of a RNA stabilization reagent (RNAlater, Ambion, Austin, TX, USA). Specimens were stored in RNAlater overnight at 4.0 C and thereafter snap-frozen and stored in liquid nitrogen. All further processing occurred simultaneously for gingival …
GSM404259	Sample 2 from patient 102, Affected site	Patient 102 gingival tissue sample collected as Affected	Diseased (BoP + interproximal PPD of>3 mm + concomitant CAL of>2 mm)	Gingival	After collection gingival tissue specimens were thoroughly rinsed with sterile normal saline solution and transferred into Eppendorf tubes containing 5 volumes of a RNA stabilization reagent (RNAlater, Ambion, Austin, TX, USA). Specimens were stored in RNAlater overnight at 4.0 C and thereafter snap-frozen and stored in liquid nitrogen. All further processing occurred simultaneously for gingival …
GSM404260	Sample 3 from patient 102, Unaffected site	Patient 102 gingival tissue sample collected as Unaffected	Healthy (no BoP + PPD of<5 mm + CAL of<3 2 mm	Gingival	After collection gingival tissue specimens were thoroughly rinsed with sterile normal saline solution and transferred into Eppendorf tubes containing 5 volumes of a RNA stabilization reagent (RNAlater, Ambion, Austin, TX, USA). Specimens were stored in RNAlater overnight at 4.0 C and thereafter snap-frozen and stored in liquid nitrogen. All further processing occurred simultaneously for gingival …
GSM404261	Sample 1 from patient 104, Affected site	Patient 104 gingival tissue sample collected as Affected	Diseased (BoP + interproximal PPD of>3 mm + concomitant CAL of>2 mm)	Gingival	After collection gingival tissue specimens were thoroughly rinsed with sterile normal saline solution and transferred into Eppendorf tubes containing 5 volumes of a RNA stabilization reagent (RNAlater, Ambion, Austin, TX, USA). Specimens were stored in RNAlater overnight at 4.0 C and thereafter snap-frozen and stored in liquid nitrogen. All further processing occurred simultaneously for gingival …
GSM404262	Sample 2 from patient 104, Affected site	Patient 104 gingival tissue sample collected as Affected	Diseased (BoP + interproximal PPD of>3 mm + concomitant CAL of>2 mm)	Gingival	After collection gingival tissue specimens were thoroughly rinsed with sterile normal saline solution and transferred into Eppendorf tubes containing 5 volumes of a RNA stabilization reagent (RNAlater, Ambion, Austin, TX, USA). Specimens were stored in RNAlater overnight at 4.0 C and thereafter snap-frozen and stored in liquid nitrogen. All further processing occurred simultaneously for gingival …
GSM404263	Sample 1 from patient 105, Affected site	Patient 105 gingival tissue sample collected as Affected	Diseased (BoP + interproximal PPD of>3 mm + concomitant CAL of>2 mm)	Gingival	After collection gingival tissue specimens were thoroughly rinsed with sterile normal saline solution and transferred into Eppendorf tubes containing 5 volumes of a RNA stabilization reagent (RNAlater, Ambion, Austin, TX, USA). Specimens were stored in RNAlater overnight at 4.0 C and thereafter snap-frozen and stored in liquid nitrogen. All further processing occurred simultaneously for gingival …
GSM404264	Sample 2 from patient 105, Affected site	Patient 105 gingival tissue sample collected as Affected	Diseased (BoP + interproximal PPD of>3 mm + concomitant CAL of>2 mm)	Gingival	After collection gingival tissue specimens were thoroughly rinsed with sterile normal saline solution and transferred into Eppendorf tubes containing 5 volumes of a RNA stabilization reagent (RNAlater, Ambion, Austin, TX, USA). Specimens were stored in RNAlater overnight at 4.0 C and thereafter snap-frozen and stored in liquid nitrogen. All further processing occurred simultaneously for gingival …
GSM404265	Sample 1 from patient 106, Affected site	Patient 106 gingival tissue sample collected as Affected	Diseased (BoP + interproximal PPD of>3 mm + concomitant CAL of>2 mm)	Gingival	After collection gingival tissue specimens were thoroughly rinsed with sterile normal saline solution and transferred into Eppendorf tubes containing 5 volumes of a RNA stabilization reagent (RNAlater, Ambion, Austin, TX, USA). Specimens were stored in RNAlater overnight at 4.0 C and thereafter snap-frozen and stored in liquid nitrogen. All further processing occurred simultaneously for gingival …
GSM404266	Sample 2 from patient 106, Affected site	Patient 106 gingival tissue sample collected as Affected	Diseased (BoP + interproximal PPD of>3 mm + concomitant CAL of>2 mm)	Gingival	After collection gingival tissue specimens were thoroughly rinsed with sterile normal saline solution and transferred into Eppendorf tubes containing 5 volumes of a RNA stabilization reagent (RNAlater, Ambion, Austin, TX, USA). Specimens were stored in RNAlater overnight at 4.0 C and thereafter snap-frozen and stored in liquid nitrogen. All further processing occurred simultaneously for gingival …
GSM404267	Sample 3 from patient 106, Unaffected site	Patient 106 gingival tissue sample collected as Unaffected	Healthy (no BoP + PPD of<5 mm + CAL of<3 2 mm	Gingival	After collection gingival tissue specimens were thoroughly rinsed with sterile normal saline solution and transferred into Eppendorf tubes containing 5 volumes of a RNA stabilization reagent (RNAlater, Ambion, Austin, TX, USA). Specimens were stored in RNAlater overnight at 4.0 C and thereafter snap-frozen and stored in liquid nitrogen. All further processing occurred simultaneously for gingival …
GSM404268	Sample 1 from patient 107, Affected site	Patient 107 gingival tissue sample collected as Affected	Diseased (BoP + interproximal PPD of>3 mm + concomitant CAL of>2 mm)	Gingival	After collection gingival tissue specimens were thoroughly rinsed with sterile normal saline solution and transferred into Eppendorf tubes containing 5 volumes of a RNA stabilization reagent (RNAlater, Ambion, Austin, TX, USA). Specimens were stored in RNAlater overnight at 4.0 C and thereafter snap-frozen and stored in liquid nitrogen. All further processing occurred simultaneously for gingival …
GSM404269	Sample 2 from patient 107, Affected site	Patient 107 gingival tissue sample collected as Affected	Diseased (BoP + interproximal PPD of>3 mm + concomitant CAL of>2 mm)	Gingival	After collection gingival tissue specimens were thoroughly rinsed with sterile normal saline solution and transferred into Eppendorf tubes containing 5 volumes of a RNA stabilization reagent (RNAlater, Ambion, Austin, TX, USA). Specimens were stored in RNAlater overnight at 4.0 C and thereafter snap-frozen and stored in liquid nitrogen. All further processing occurred simultaneously for gingival …
GSM404270	Sample 3 from patient 107, Unaffected site	Patient 107 gingival tissue sample collected as Unaffected	Healthy (no BoP + PPD of<5 mm + CAL of<3 2 mm	Gingival	After collection gingival tissue specimens were thoroughly rinsed with sterile normal saline solution and transferred into Eppendorf tubes containing 5 volumes of a RNA stabilization reagent (RNAlater, Ambion, Austin, TX, USA). Specimens were stored in RNAlater overnight at 4.0 C and thereafter snap-frozen and stored in liquid nitrogen. All further processing occurred simultaneously for gingival …
GSM404271	Sample 1 from patient 108, Affected site	Patient 108 gingival tissue sample collected as Affected	Diseased (BoP + interproximal PPD of>3 mm + concomitant CAL of>2 mm)	Gingival	After collection gingival tissue specimens were thoroughly rinsed with sterile normal saline solution and transferred into Eppendorf tubes containing 5 volumes of a RNA stabilization reagent (RNAlater, Ambion, Austin, TX, USA). Specimens were stored in RNAlater overnight at 4.0 C and thereafter snap-frozen and stored in liquid nitrogen. All further processing occurred simultaneously for gingival …
GSM404272	Sample 2 from patient 108, Affected site	Patient 108 gingival tissue sample collected as Affected	Diseased (BoP + interproximal PPD of>3 mm + concomitant CAL of>2 mm)	Gingival	After collection gingival tissue specimens were thoroughly rinsed with sterile normal saline solution and transferred into Eppendorf tubes containing 5 volumes of a RNA stabilization reagent (RNAlater, Ambion, Austin, TX, USA). Specimens were stored in RNAlater overnight at 4.0 C and thereafter snap-frozen and stored in liquid nitrogen. All further processing occurred simultaneously for gingival …
GSM404273	Sample 3 from patient 108, Unaffected site	Patient 108 gingival tissue sample collected as Unaffected	Healthy (no BoP + PPD of<5 mm + CAL of<3 2 mm	Gingival	After collection gingival tissue specimens were thoroughly rinsed with sterile normal saline solution and transferred into Eppendorf tubes containing 5 volumes of a RNA stabilization reagent (RNAlater, Ambion, Austin, TX, USA). Specimens were stored in RNAlater overnight at 4.0 C and thereafter snap-frozen and stored in liquid nitrogen. All further processing occurred simultaneously for gingival …
GSM404274	Sample 1 from patient 109, Affected site	Patient 109 gingival tissue sample collected as Affected	Diseased (BoP + interproximal PPD of>3 mm + concomitant CAL of>2 mm)	Gingival	After collection gingival tissue specimens were thoroughly rinsed with sterile normal saline solution and transferred into Eppendorf tubes containing 5 volumes of a RNA stabilization reagent (RNAlater, Ambion, Austin, TX, USA). Specimens were stored in RNAlater overnight at 4.0 C and thereafter snap-frozen and stored in liquid nitrogen. All further processing occurred simultaneously for gingival …
GSM404275	Sample 2 from patient 109, Affected site	Patient 109 gingival tissue sample collected as Affected	Diseased (BoP + interproximal PPD of>3 mm + concomitant CAL of>2 mm)	Gingival	After collection gingival tissue specimens were thoroughly rinsed with sterile normal saline solution and transferred into Eppendorf tubes containing 5 volumes of a RNA stabilization reagent (RNAlater, Ambion, Austin, TX, USA). Specimens were stored in RNAlater overnight at 4.0 C and thereafter snap-frozen and stored in liquid nitrogen. All further processing occurred simultaneously for gingival …
GSM404276	Sample 1 from patient 110, Affected site	Patient 110 gingival tissue sample collected as Affected	Diseased (BoP + interproximal PPD of>3 mm + concomitant CAL of>2 mm)	Gingival	After collection gingival tissue specimens were thoroughly rinsed with sterile normal saline solution and transferred into Eppendorf tubes containing 5 volumes of a RNA stabilization reagent (RNAlater, Ambion, Austin, TX, USA). Specimens were stored in RNAlater overnight at 4.0 C and thereafter snap-frozen and stored in liquid nitrogen. All further processing occurred simultaneously for gingival …
GSM404277	Sample 2 from patient 110, Affected site	Patient 110 gingival tissue sample collected as Affected	Diseased (BoP + interproximal PPD of>3 mm + concomitant CAL of>2 mm)	Gingival	After collection gingival tissue specimens were thoroughly rinsed with sterile normal saline solution and transferred into Eppendorf tubes containing 5 volumes of a RNA stabilization reagent (RNAlater, Ambion, Austin, TX, USA). Specimens were stored in RNAlater overnight at 4.0 C and thereafter snap-frozen and stored in liquid nitrogen. All further processing occurred simultaneously for gingival …
GSM404278	Sample 1 from patient 111, Affected site	Patient 111 gingival tissue sample collected as Affected	Diseased (BoP + interproximal PPD of>3 mm + concomitant CAL of>2 mm)	Gingival	After collection gingival tissue specimens were thoroughly rinsed with sterile normal saline solution and transferred into Eppendorf tubes containing 5 volumes of a RNA stabilization reagent (RNAlater, Ambion, Austin, TX, USA). Specimens were stored in RNAlater overnight at 4.0 C and thereafter snap-frozen and stored in liquid nitrogen. All further processing occurred simultaneously for gingival …
GSM404279	Sample 2 from patient 111, Affected site	Patient 111 gingival tissue sample collected as Affected	Diseased (BoP + interproximal PPD of>3 mm + concomitant CAL of>2 mm)	Gingival	After collection gingival tissue specimens were thoroughly rinsed with sterile normal saline solution and transferred into Eppendorf tubes containing 5 volumes of a RNA stabilization reagent (RNAlater, Ambion, Austin, TX, USA). Specimens were stored in RNAlater overnight at 4.0 C and thereafter snap-frozen and stored in liquid nitrogen. All further processing occurred simultaneously for gingival …
GSM404280	Sample 1 from patient 112, Affected site	Patient 112 gingival tissue sample collected as Affected	Diseased (BoP + interproximal PPD of>3 mm + concomitant CAL of>2 mm)	Gingival	After collection gingival tissue specimens were thoroughly rinsed with sterile normal saline solution and transferred into Eppendorf tubes containing 5 volumes of a RNA stabilization reagent (RNAlater, Ambion, Austin, TX, USA). Specimens were stored in RNAlater overnight at 4.0 C and thereafter snap-frozen and stored in liquid nitrogen. All further processing occurred simultaneously for gingival …
GSM404281	Sample 2 from patient 112, Affected site	Patient 112 gingival tissue sample collected as Affected	Diseased (BoP + interproximal PPD of>3 mm + concomitant CAL of>2 mm)	Gingival	After collection gingival tissue specimens were thoroughly rinsed with sterile normal saline solution and transferred into Eppendorf tubes containing 5 volumes of a RNA stabilization reagent (RNAlater, Ambion, Austin, TX, USA). Specimens were stored in RNAlater overnight at 4.0 C and thereafter snap-frozen and stored in liquid nitrogen. All further processing occurred simultaneously for gingival …
GSM404282	Sample 1 from patient 113, Affected site	Patient 113 gingival tissue sample collected as Affected	Diseased (BoP + interproximal PPD of>3 mm + concomitant CAL of>2 mm)	Gingival	After collection gingival tissue specimens were thoroughly rinsed with sterile normal saline solution and transferred into Eppendorf tubes containing 5 volumes of a RNA stabilization reagent (RNAlater, Ambion, Austin, TX, USA). Specimens were stored in RNAlater overnight at 4.0 C and thereafter snap-frozen and stored in liquid nitrogen. All further processing occurred simultaneously for gingival …
GSM404283	Sample 2 from patient 113, Affected site	Patient 113 gingival tissue sample collected as Affected	Diseased (BoP + interproximal PPD of>3 mm + concomitant CAL of>2 mm)	Gingival	After collection gingival tissue specimens were thoroughly rinsed with sterile normal saline solution and transferred into Eppendorf tubes containing 5 volumes of a RNA stabilization reagent (RNAlater, Ambion, Austin, TX, USA). Specimens were stored in RNAlater overnight at 4.0 C and thereafter snap-frozen and stored in liquid nitrogen. All further processing occurred simultaneously for gingival …
GSM404284	Sample 3 from patient 113, Unaffected site	Patient 113 gingival tissue sample collected as Unaffected	Healthy (no BoP + PPD of<5 mm + CAL of<3 2 mm	Gingival	After collection gingival tissue specimens were thoroughly rinsed with sterile normal saline solution and transferred into Eppendorf tubes containing 5 volumes of a RNA stabilization reagent (RNAlater, Ambion, Austin, TX, USA). Specimens were stored in RNAlater overnight at 4.0 C and thereafter snap-frozen and stored in liquid nitrogen. All further processing occurred simultaneously for gingival …
GSM404285	Sample 1 from patient 115, Affected site	Patient 115 gingival tissue sample collected as Affected	Diseased (BoP + interproximal PPD of>3 mm + concomitant CAL of>2 mm)	Gingival	After collection gingival tissue specimens were thoroughly rinsed with sterile normal saline solution and transferred into Eppendorf tubes containing 5 volumes of a RNA stabilization reagent (RNAlater, Ambion, Austin, TX, USA). Specimens were stored in RNAlater overnight at 4.0 C and thereafter snap-frozen and stored in liquid nitrogen. All further processing occurred simultaneously for gingival …
GSM404286	Sample 2 from patient 115, Affected site	Patient 115 gingival tissue sample collected as Affected	Diseased (BoP + interproximal PPD of>3 mm + concomitant CAL of>2 mm)	Gingival	After collection gingival tissue specimens were thoroughly rinsed with sterile normal saline solution and transferred into Eppendorf tubes containing 5 volumes of a RNA stabilization reagent (RNAlater, Ambion, Austin, TX, USA). Specimens were stored in RNAlater overnight at 4.0 C and thereafter snap-frozen and stored in liquid nitrogen. All further processing occurred simultaneously for gingival …
GSM404287	Sample 1 from patient 116, Affected site	Patient 116 gingival tissue sample collected as Affected	Diseased (BoP + interproximal PPD of>3 mm + concomitant CAL of>2 mm)	Gingival	After collection gingival tissue specimens were thoroughly rinsed with sterile normal saline solution and transferred into Eppendorf tubes containing 5 volumes of a RNA stabilization reagent (RNAlater, Ambion, Austin, TX, USA). Specimens were stored in RNAlater overnight at 4.0 C and thereafter snap-frozen and stored in liquid nitrogen. All further processing occurred simultaneously for gingival …
GSM404288	Sample 2 from patient 116, Affected site	Patient 116 gingival tissue sample collected as Affected	Diseased (BoP + interproximal PPD of>3 mm + concomitant CAL of>2 mm)	Gingival	After collection gingival tissue specimens were thoroughly rinsed with sterile normal saline solution and transferred into Eppendorf tubes containing 5 volumes of a RNA stabilization reagent (RNAlater, Ambion, Austin, TX, USA). Specimens were stored in RNAlater overnight at 4.0 C and thereafter snap-frozen and stored in liquid nitrogen. All further processing occurred simultaneously for gingival …
GSM404289	Sample 1 from patient 117, Affected site	Patient 117 gingival tissue sample collected as Affected	Diseased (BoP + interproximal PPD of>3 mm + concomitant CAL of>2 mm)	Gingival	After collection gingival tissue specimens were thoroughly rinsed with sterile normal saline solution and transferred into Eppendorf tubes containing 5 volumes of a RNA stabilization reagent (RNAlater, Ambion, Austin, TX, USA). Specimens were stored in RNAlater overnight at 4.0 C and thereafter snap-frozen and stored in liquid nitrogen. All further processing occurred simultaneously for gingival …
GSM404290	Sample 2 from patient 117, Affected site	Patient 117 gingival tissue sample collected as Affected	Diseased (BoP + interproximal PPD of>3 mm + concomitant CAL of>2 mm)	Gingival	After collection gingival tissue specimens were thoroughly rinsed with sterile normal saline solution and transferred into Eppendorf tubes containing 5 volumes of a RNA stabilization reagent (RNAlater, Ambion, Austin, TX, USA). Specimens were stored in RNAlater overnight at 4.0 C and thereafter snap-frozen and stored in liquid nitrogen. All further processing occurred simultaneously for gingival …
GSM404291	Sample 1 from patient 118, Affected site	Patient 118 gingival tissue sample collected as Affected	Diseased (BoP + interproximal PPD of>3 mm + concomitant CAL of>2 mm)	Gingival	After collection gingival tissue specimens were thoroughly rinsed with sterile normal saline solution and transferred into Eppendorf tubes containing 5 volumes of a RNA stabilization reagent (RNAlater, Ambion, Austin, TX, USA). Specimens were stored in RNAlater overnight at 4.0 C and thereafter snap-frozen and stored in liquid nitrogen. All further processing occurred simultaneously for gingival …
GSM404292	Sample 2 from patient 118, Affected site	Patient 118 gingival tissue sample collected as Affected	Diseased (BoP + interproximal PPD of>3 mm + concomitant CAL of>2 mm)	Gingival	After collection gingival tissue specimens were thoroughly rinsed with sterile normal saline solution and transferred into Eppendorf tubes containing 5 volumes of a RNA stabilization reagent (RNAlater, Ambion, Austin, TX, USA). Specimens were stored in RNAlater overnight at 4.0 C and thereafter snap-frozen and stored in liquid nitrogen. All further processing occurred simultaneously for gingival …
GSM404293	Sample 1 from patient 119, Affected site	Patient 119 gingival tissue sample collected as Affected	Diseased (BoP + interproximal PPD of>3 mm + concomitant CAL of>2 mm)	Gingival	After collection gingival tissue specimens were thoroughly rinsed with sterile normal saline solution and transferred into Eppendorf tubes containing 5 volumes of a RNA stabilization reagent (RNAlater, Ambion, Austin, TX, USA). Specimens were stored in RNAlater overnight at 4.0 C and thereafter snap-frozen and stored in liquid nitrogen. All further processing occurred simultaneously for gingival …
GSM404294	Sample 2 from patient 119, Affected site	Patient 119 gingival tissue sample collected as Affected	Diseased (BoP + interproximal PPD of>3 mm + concomitant CAL of>2 mm)	Gingival	After collection gingival tissue specimens were thoroughly rinsed with sterile normal saline solution and transferred into Eppendorf tubes containing 5 volumes of a RNA stabilization reagent (RNAlater, Ambion, Austin, TX, USA). Specimens were stored in RNAlater overnight at 4.0 C and thereafter snap-frozen and stored in liquid nitrogen. All further processing occurred simultaneously for gingival …
GSM404295	Sample 1 from patient 120, Affected site	Patient 120 gingival tissue sample collected as Affected	Diseased (BoP + interproximal PPD of>3 mm + concomitant CAL of>2 mm)	Gingival	After collection gingival tissue specimens were thoroughly rinsed with sterile normal saline solution and transferred into Eppendorf tubes containing 5 volumes of a RNA stabilization reagent (RNAlater, Ambion, Austin, TX, USA). Specimens were stored in RNAlater overnight at 4.0 C and thereafter snap-frozen and stored in liquid nitrogen. All further processing occurred simultaneously for gingival …
GSM404296	Sample 2 from patient 120, Affected site	Patient 120 gingival tissue sample collected as Affected	Diseased (BoP + interproximal PPD of>3 mm + concomitant CAL of>2 mm)	Gingival	After collection gingival tissue specimens were thoroughly rinsed with sterile normal saline solution and transferred into Eppendorf tubes containing 5 volumes of a RNA stabilization reagent (RNAlater, Ambion, Austin, TX, USA). Specimens were stored in RNAlater overnight at 4.0 C and thereafter snap-frozen and stored in liquid nitrogen. All further processing occurred simultaneously for gingival …
GSM404297	Sample 1 from patient 121, Affected site	Patient 121 gingival tissue sample collected as Affected	Diseased (BoP + interproximal PPD of>3 mm + concomitant CAL of>2 mm)	Gingival	After collection gingival tissue specimens were thoroughly rinsed with sterile normal saline solution and transferred into Eppendorf tubes containing 5 volumes of a RNA stabilization reagent (RNAlater, Ambion, Austin, TX, USA). Specimens were stored in RNAlater overnight at 4.0 C and thereafter snap-frozen and stored in liquid nitrogen. All further processing occurred simultaneously for gingival …
GSM404298	Sample 2 from patient 121, Affected site	Patient 121 gingival tissue sample collected as Affected	Diseased (BoP + interproximal PPD of>3 mm + concomitant CAL of>2 mm)	Gingival	After collection gingival tissue specimens were thoroughly rinsed with sterile normal saline solution and transferred into Eppendorf tubes containing 5 volumes of a RNA stabilization reagent (RNAlater, Ambion, Austin, TX, USA). Specimens were stored in RNAlater overnight at 4.0 C and thereafter snap-frozen and stored in liquid nitrogen. All further processing occurred simultaneously for gingival …
GSM404299	Sample 1 from patient 123, Affected site	Patient 123 gingival tissue sample collected as Affected	Diseased (BoP + interproximal PPD of>3 mm + concomitant CAL of>2 mm)	Gingival	After collection gingival tissue specimens were thoroughly rinsed with sterile normal saline solution and transferred into Eppendorf tubes containing 5 volumes of a RNA stabilization reagent (RNAlater, Ambion, Austin, TX, USA). Specimens were stored in RNAlater overnight at 4.0 C and thereafter snap-frozen and stored in liquid nitrogen. All further processing occurred simultaneously for gingival …
GSM404300	Sample 2 from patient 123, Affected site	Patient 123 gingival tissue sample collected as Affected	Diseased (BoP + interproximal PPD of>3 mm + concomitant CAL of>2 mm)	Gingival	After collection gingival tissue specimens were thoroughly rinsed with sterile normal saline solution and transferred into Eppendorf tubes containing 5 volumes of a RNA stabilization reagent (RNAlater, Ambion, Austin, TX, USA). Specimens were stored in RNAlater overnight at 4.0 C and thereafter snap-frozen and stored in liquid nitrogen. All further processing occurred simultaneously for gingival …
GSM404301	Sample 1 from patient 124, Affected site	Patient 124 gingival tissue sample collected as Affected	Diseased (BoP + interproximal PPD of>3 mm + concomitant CAL of>2 mm)	Gingival	After collection gingival tissue specimens were thoroughly rinsed with sterile normal saline solution and transferred into Eppendorf tubes containing 5 volumes of a RNA stabilization reagent (RNAlater, Ambion, Austin, TX, USA). Specimens were stored in RNAlater overnight at 4.0 C and thereafter snap-frozen and stored in liquid nitrogen. All further processing occurred simultaneously for gingival …
GSM404302	Sample 2 from patient 124, Affected site	Patient 124 gingival tissue sample collected as Affected	Diseased (BoP + interproximal PPD of>3 mm + concomitant CAL of>2 mm)	Gingival	After collection gingival tissue specimens were thoroughly rinsed with sterile normal saline solution and transferred into Eppendorf tubes containing 5 volumes of a RNA stabilization reagent (RNAlater, Ambion, Austin, TX, USA). Specimens were stored in RNAlater overnight at 4.0 C and thereafter snap-frozen and stored in liquid nitrogen. All further processing occurred simultaneously for gingival …
GSM404303	Sample 1 from patient 125, Affected site	Patient 125 gingival tissue sample collected as Affected	Diseased (BoP + interproximal PPD of>3 mm + concomitant CAL of>2 mm)	Gingival	After collection gingival tissue specimens were thoroughly rinsed with sterile normal saline solution and transferred into Eppendorf tubes containing 5 volumes of a RNA stabilization reagent (RNAlater, Ambion, Austin, TX, USA). Specimens were stored in RNAlater overnight at 4.0 C and thereafter snap-frozen and stored in liquid nitrogen. All further processing occurred simultaneously for gingival …
GSM404304	Sample 2 from patient 125, Affected site	Patient 125 gingival tissue sample collected as Affected	Diseased (BoP + interproximal PPD of>3 mm + concomitant CAL of>2 mm)	Gingival	After collection gingival tissue specimens were thoroughly rinsed with sterile normal saline solution and transferred into Eppendorf tubes containing 5 volumes of a RNA stabilization reagent (RNAlater, Ambion, Austin, TX, USA). Specimens were stored in RNAlater overnight at 4.0 C and thereafter snap-frozen and stored in liquid nitrogen. All further processing occurred simultaneously for gingival …
GSM404305	Sample 1 from patient 126, Affected site	Patient 126 gingival tissue sample collected as Affected	Diseased (BoP + interproximal PPD of>3 mm + concomitant CAL of>2 mm)	Gingival	After collection gingival tissue specimens were thoroughly rinsed with sterile normal saline solution and transferred into Eppendorf tubes containing 5 volumes of a RNA stabilization reagent (RNAlater, Ambion, Austin, TX, USA). Specimens were stored in RNAlater overnight at 4.0 C and thereafter snap-frozen and stored in liquid nitrogen. All further processing occurred simultaneously for gingival …
GSM404306	Sample 2 from patient 126, Affected site	Patient 126 gingival tissue sample collected as Affected	Diseased (BoP + interproximal PPD of>3 mm + concomitant CAL of>2 mm)	Gingival	After collection gingival tissue specimens were thoroughly rinsed with sterile normal saline solution and transferred into Eppendorf tubes containing 5 volumes of a RNA stabilization reagent (RNAlater, Ambion, Austin, TX, USA). Specimens were stored in RNAlater overnight at 4.0 C and thereafter snap-frozen and stored in liquid nitrogen. All further processing occurred simultaneously for gingival …
GSM404307	Sample 1 from patient 127, Affected site	Patient 127 gingival tissue sample collected as Affected	Diseased (BoP + interproximal PPD of>3 mm + concomitant CAL of>2 mm)	Gingival	After collection gingival tissue specimens were thoroughly rinsed with sterile normal saline solution and transferred into Eppendorf tubes containing 5 volumes of a RNA stabilization reagent (RNAlater, Ambion, Austin, TX, USA). Specimens were stored in RNAlater overnight at 4.0 C and thereafter snap-frozen and stored in liquid nitrogen. All further processing occurred simultaneously for gingival …
GSM404308	Sample 2 from patient 127, Affected site	Patient 127 gingival tissue sample collected as Affected	Diseased (BoP + interproximal PPD of>3 mm + concomitant CAL of>2 mm)	Gingival	After collection gingival tissue specimens were thoroughly rinsed with sterile normal saline solution and transferred into Eppendorf tubes containing 5 volumes of a RNA stabilization reagent (RNAlater, Ambion, Austin, TX, USA). Specimens were stored in RNAlater overnight at 4.0 C and thereafter snap-frozen and stored in liquid nitrogen. All further processing occurred simultaneously for gingival …
GSM404309	Sample 1 from patient 129, Affected site	Patient 129 gingival tissue sample collected as Affected	Diseased (BoP + interproximal PPD of>3 mm + concomitant CAL of>2 mm)	Gingival	After collection gingival tissue specimens were thoroughly rinsed with sterile normal saline solution and transferred into Eppendorf tubes containing 5 volumes of a RNA stabilization reagent (RNAlater, Ambion, Austin, TX, USA). Specimens were stored in RNAlater overnight at 4.0 C and thereafter snap-frozen and stored in liquid nitrogen. All further processing occurred simultaneously for gingival …
GSM404310	Sample 2 from patient 129, Affected site	Patient 129 gingival tissue sample collected as Affected	Diseased (BoP + interproximal PPD of>3 mm + concomitant CAL of>2 mm)	Gingival	After collection gingival tissue specimens were thoroughly rinsed with sterile normal saline solution and transferred into Eppendorf tubes containing 5 volumes of a RNA stabilization reagent (RNAlater, Ambion, Austin, TX, USA). Specimens were stored in RNAlater overnight at 4.0 C and thereafter snap-frozen and stored in liquid nitrogen. All further processing occurred simultaneously for gingival …
GSM404311	Sample 1 from patient 130, Affected site	Patient 130 gingival tissue sample collected as Affected	Diseased (BoP + interproximal PPD of>3 mm + concomitant CAL of>2 mm)	Gingival	After collection gingival tissue specimens were thoroughly rinsed with sterile normal saline solution and transferred into Eppendorf tubes containing 5 volumes of a RNA stabilization reagent (RNAlater, Ambion, Austin, TX, USA). Specimens were stored in RNAlater overnight at 4.0 C and thereafter snap-frozen and stored in liquid nitrogen. All further processing occurred simultaneously for gingival …
GSM404312	Sample 2 from patient 130, Affected site	Patient 130 gingival tissue sample collected as Affected	Diseased (BoP + interproximal PPD of>3 mm + concomitant CAL of>2 mm)	Gingival	After collection gingival tissue specimens were thoroughly rinsed with sterile normal saline solution and transferred into Eppendorf tubes containing 5 volumes of a RNA stabilization reagent (RNAlater, Ambion, Austin, TX, USA). Specimens were stored in RNAlater overnight at 4.0 C and thereafter snap-frozen and stored in liquid nitrogen. All further processing occurred simultaneously for gingival …
GSM404313	Sample 1 from patient 131, Affected site	Patient 131 gingival tissue sample collected as Affected	Diseased (BoP + interproximal PPD of>3 mm + concomitant CAL of>2 mm)	Gingival	After collection gingival tissue specimens were thoroughly rinsed with sterile normal saline solution and transferred into Eppendorf tubes containing 5 volumes of a RNA stabilization reagent (RNAlater, Ambion, Austin, TX, USA). Specimens were stored in RNAlater overnight at 4.0 C and thereafter snap-frozen and stored in liquid nitrogen. All further processing occurred simultaneously for gingival …
GSM404314	Sample 2 from patient 131, Affected site	Patient 131 gingival tissue sample collected as Affected	Diseased (BoP + interproximal PPD of>3 mm + concomitant CAL of>2 mm)	Gingival	After collection gingival tissue specimens were thoroughly rinsed with sterile normal saline solution and transferred into Eppendorf tubes containing 5 volumes of a RNA stabilization reagent (RNAlater, Ambion, Austin, TX, USA). Specimens were stored in RNAlater overnight at 4.0 C and thereafter snap-frozen and stored in liquid nitrogen. All further processing occurred simultaneously for gingival …

## Sheet: PD-GSE10334
!Sample_geo_accession	!Sample_title	!Sample_source_name_ch1	Gingival tissue phenotype	Tissue
GSM261086	Gingival tissue sample 1 from patient 1, Affected site	Patient 1 gingival tissue sample collected as Affected	Diseased (BoP + interproximal PPD of>3 mm + concomitant CAL of>2 mm)	Gingival
GSM261087	Gingival tissue sample 2 from patient 1, Affected site	Patient 1 gingival tissue sample collected as Affected	Diseased (BoP + interproximal PPD of>3 mm + concomitant CAL of>2 mm)	Gingival
GSM261088	Gingival tissue sample 4 from patient 1, Unaffected site	Patient 1 gingival tissue sample collected as Unaffected	Healthy (no BoP + PPD of<5 mm + CAL of<3 2 mm	Gingival
GSM261089	Gingival tissue sample 1 from patient 10, Affected site	Patient 10 gingival tissue sample collected as Affected	Diseased (BoP + interproximal PPD of>3 mm + concomitant CAL of>2 mm)	Gingival
GSM261090	Gingival tissue sample 2 from patient 10, Affected site	Patient 10 gingival tissue sample collected as Affected	Diseased (BoP + interproximal PPD of>3 mm + concomitant CAL of>2 mm)	Gingival
GSM261091	Gingival tissue sample 4 from patient 10, Unaffected site	Patient 10 gingival tissue sample collected as Unaffected	Healthy (no BoP + PPD of<5 mm + CAL of<3 2 mm	Gingival
GSM261092	Gingival tissue sample 1 from patient 11, Affected site	Patient 11 gingival tissue sample collected as Affected	Diseased (BoP + interproximal PPD of>3 mm + concomitant CAL of>2 mm)	Gingival
GSM261093	Gingival tissue sample 2 from patient 11, Affected site	Patient 11 gingival tissue sample collected as Affected	Diseased (BoP + interproximal PPD of>3 mm + concomitant CAL of>2 mm)	Gingival
GSM261094	Gingival tissue sample 1 from patient 12, Affected site	Patient 12 gingival tissue sample collected as Affected	Diseased (BoP + interproximal PPD of>3 mm + concomitant CAL of>2 mm)	Gingival
GSM261095	Gingival tissue sample 2 from patient 12, Affected site	Patient 12 gingival tissue sample collected as Affected	Diseased (BoP + interproximal PPD of>3 mm + concomitant CAL of>2 mm)	Gingival
GSM261096	Gingival tissue sample 4 from patient 12, Unaffected site	Patient 12 gingival tissue sample collected as Unaffected	Healthy (no BoP + PPD of<5 mm + CAL of<3 2 mm	Gingival
GSM261097	Gingival tissue sample 1 from patient 13, Affected site	Patient 13 gingival tissue sample collected as Affected	Diseased (BoP + interproximal PPD of>3 mm + concomitant CAL of>2 mm)	Gingival
GSM261098	Gingival tissue sample 2 from patient 13, Affected site	Patient 13 gingival tissue sample collected as Affected	Diseased (BoP + interproximal PPD of>3 mm + concomitant CAL of>2 mm)	Gingival
GSM261099	Gingival tissue sample 3 from patient 13, Unaffected site	Patient 13 gingival tissue sample collected as Unaffected	Healthy (no BoP + PPD of<5 mm + CAL of<3 2 mm	Gingival
GSM261100	Gingival tissue sample 1 from patient 14, Affected site	Patient 14 gingival tissue sample collected as Affected	Diseased (BoP + interproximal PPD of>3 mm + concomitant CAL of>2 mm)	Gingival
GSM261101	Gingival tissue sample 2 from patient 14, Affected site	Patient 14 gingival tissue sample collected as Affected	Diseased (BoP + interproximal PPD of>3 mm + concomitant CAL of>2 mm)	Gingival
GSM261102	Gingival tissue sample 3 from patient 14, Unaffected site	Patient 14 gingival tissue sample collected as Unaffected	Healthy (no BoP + PPD of<5 mm + CAL of<3 2 mm	Gingival
GSM261103	Gingival tissue sample 1 from patient 15, Affected site	Patient 15 gingival tissue sample collected as Affected	Diseased (BoP + interproximal PPD of>3 mm + concomitant CAL of>2 mm)	Gingival
GSM261104	Gingival tissue sample 2 from patient 15, Affected site	Patient 15 gingival tissue sample collected as Affected	Diseased (BoP + interproximal PPD of>3 mm + concomitant CAL of>2 mm)	Gingival
GSM261105	Gingival tissue sample 1 from patient 16, Affected site	Patient 16 gingival tissue sample collected as Affected	Diseased (BoP + interproximal PPD of>3 mm + concomitant CAL of>2 mm)	Gingival
GSM261106	Gingival tissue sample 2 from patient 16, Affected site	Patient 16 gingival tissue sample collected as Affected	Diseased (BoP + interproximal PPD of>3 mm + concomitant CAL of>2 mm)	Gingival
GSM261107	Gingival tissue sample 1 from patient 17, Affected site	Patient 17 gingival tissue sample collected as Affected	Diseased (BoP + interproximal PPD of>3 mm + concomitant CAL of>2 mm)	Gingival
GSM261108	Gingival tissue sample 2 from patient 17, Affected site	Patient 17 gingival tissue sample collected as Affected	Diseased (BoP + interproximal PPD of>3 mm + concomitant CAL of>2 mm)	Gingival
GSM261109	Gingival tissue sample 4 from patient 17, Unaffected site	Patient 17 gingival tissue sample collected as Unaffected	Healthy (no BoP + PPD of<5 mm + CAL of<3 2 mm	Gingival
GSM261110	Gingival tissue sample 1 from patient 18, Affected site	Patient 18 gingival tissue sample collected as Affected	Diseased (BoP + interproximal PPD of>3 mm + concomitant CAL of>2 mm)	Gingival
GSM261111	Gingival tissue sample 2 from patient 18, Affected site	Patient 18 gingival tissue sample collected as Affected	Diseased (BoP + interproximal PPD of>3 mm + concomitant CAL of>2 mm)	Gingival
GSM261112	Gingival tissue sample 3 from patient 18, Affected site	Patient 18 gingival tissue sample collected as Affected	Diseased (BoP + interproximal PPD of>3 mm + concomitant CAL of>2 mm)	Gingival
GSM261113	Gingival tissue sample 4 from patient 18, Unaffected site	Patient 18 gingival tissue sample collected as Unaffected	Healthy (no BoP + PPD of<5 mm + CAL of<3 2 mm	Gingival
GSM261114	Gingival tissue sample 1 from patient 2, Affected site	Patient 2 gingival tissue sample collected as Affected	Diseased (BoP + interproximal PPD of>3 mm + concomitant CAL of>2 mm)	Gingival
GSM261115	Gingival tissue sample 2 from patient 2, Affected site	Patient 2 gingival tissue sample collected as Affected	Diseased (BoP + interproximal PPD of>3 mm + concomitant CAL of>2 mm)	Gingival
GSM261116	Gingival tissue sample 4 from patient 2, Unaffected site	Patient 2 gingival tissue sample collected as Unaffected	Healthy (no BoP + PPD of<5 mm + CAL of<3 2 mm	Gingival
GSM261117	Gingival tissue sample 1 from patient 20, Unaffected site	Patient 20 gingival tissue sample collected as Unaffected	Healthy (no BoP + PPD of<5 mm + CAL of<3 2 mm	Gingival
GSM261118	Gingival tissue sample 2 from patient 20, Affected site	Patient 20 gingival tissue sample collected as Affected	Diseased (BoP + interproximal PPD of>3 mm + concomitant CAL of>2 mm)	Gingival
GSM261119	Gingival tissue sample 3 from patient 20, Affected site	Patient 20 gingival tissue sample collected as Affected	Diseased (BoP + interproximal PPD of>3 mm + concomitant CAL of>2 mm)	Gingival
GSM261120	Gingival tissue sample 1 from patient 21, Affected site	Patient 21 gingival tissue sample collected as Affected	Diseased (BoP + interproximal PPD of>3 mm + concomitant CAL of>2 mm)	Gingival
GSM261121	Gingival tissue sample 2 from patient 21, Affected site	Patient 21 gingival tissue sample collected as Affected	Diseased (BoP + interproximal PPD of>3 mm + concomitant CAL of>2 mm)	Gingival
GSM261122	Gingival tissue sample 3 from patient 21, Unaffected site	Patient 21 gingival tissue sample collected as Unaffected	Healthy (no BoP + PPD of<5 mm + CAL of<3 2 mm	Gingival
GSM261123	Gingival tissue sample 1 from patient 22, Affected site	Patient 22 gingival tissue sample collected as Affected	Diseased (BoP + interproximal PPD of>3 mm + concomitant CAL of>2 mm)	Gingival
GSM261124	Gingival tissue sample 2 from patient 22, Affected site	Patient 22 gingival tissue sample collected as Affected	Diseased (BoP + interproximal PPD of>3 mm + concomitant CAL of>2 mm)	Gingival
GSM261125	Gingival tissue sample 1 from patient 23, Affected site	Patient 23 gingival tissue sample collected as Affected	Diseased (BoP + interproximal PPD of>3 mm + concomitant CAL of>2 mm)	Gingival
GSM261126	Gingival tissue sample 2 from patient 23, Affected site	Patient 23 gingival tissue sample collected as Affected	Diseased (BoP + interproximal PPD of>3 mm + concomitant CAL of>2 mm)	Gingival
GSM261127	Gingival tissue sample 4 from patient 23, Unaffected site	Patient 23 gingival tissue sample collected as Unaffected	Healthy (no BoP + PPD of<5 mm + CAL of<3 2 mm	Gingival
GSM261128	Gingival tissue sample 1 from patient 24, Affected site	Patient 24 gingival tissue sample collected as Affected	Diseased (BoP + interproximal PPD of>3 mm + concomitant CAL of>2 mm)	Gingival
GSM261129	Gingival tissue sample 2 from patient 24, Affected site	Patient 24 gingival tissue sample collected as Affected	Diseased (BoP + interproximal PPD of>3 mm + concomitant CAL of>2 mm)	Gingival
GSM261130	Gingival tissue sample 1 from patient 25, Affected site	Patient 25 gingival tissue sample collected as Affected	Diseased (BoP + interproximal PPD of>3 mm + concomitant CAL of>2 mm)	Gingival
GSM261131	Gingival tissue sample 2 from patient 25, Affected site	Patient 25 gingival tissue sample collected as Affected	Diseased (BoP + interproximal PPD of>3 mm + concomitant CAL of>2 mm)	Gingival
GSM261132	Gingival tissue sample 1 from patient 26, Affected site	Patient 26 gingival tissue sample collected as Affected	Diseased (BoP + interproximal PPD of>3 mm + concomitant CAL of>2 mm)	Gingival
GSM261133	Gingival tissue sample 2 from patient 26, Affected site	Patient 26 gingival tissue sample collected as Affected	Diseased (BoP + interproximal PPD of>3 mm + concomitant CAL of>2 mm)	Gingival
GSM261134	Gingival tissue sample 4 from patient 26, Unaffected site	Patient 26 gingival tissue sample collected as Unaffected	Healthy (no BoP + PPD of<5 mm + CAL of<3 2 mm	Gingival
GSM261135	Gingival tissue sample 1 from patient 27, Affected site	Patient 27 gingival tissue sample collected as Affected	Diseased (BoP + interproximal PPD of>3 mm + concomitant CAL of>2 mm)	Gingival
GSM261136	Gingival tissue sample 2 from patient 27, Affected site	Patient 27 gingival tissue sample collected as Affected	Diseased (BoP + interproximal PPD of>3 mm + concomitant CAL of>2 mm)	Gingival
GSM261137	Gingival tissue sample 3 from patient 27, Unaffected site	Patient 27 gingival tissue sample collected as Unaffected	Healthy (no BoP + PPD of<5 mm + CAL of<3 2 mm	Gingival
GSM261138	Gingival tissue sample 1 from patient 28, Unaffected site	Patient 28 gingival tissue sample collected as Unaffected	Healthy (no BoP + PPD of<5 mm + CAL of<3 2 mm	Gingival
GSM261139	Gingival tissue sample 2 from patient 28, Affected site	Patient 28 gingival tissue sample collected as Affected	Diseased (BoP + interproximal PPD of>3 mm + concomitant CAL of>2 mm)	Gingival
GSM261140	Gingival tissue sample 3 from patient 28, Affected site	Patient 28 gingival tissue sample collected as Affected	Diseased (BoP + interproximal PPD of>3 mm + concomitant CAL of>2 mm)	Gingival
GSM261141	Gingival tissue sample 1 from patient 29, Affected site	Patient 29 gingival tissue sample collected as Affected	Diseased (BoP + interproximal PPD of>3 mm + concomitant CAL of>2 mm)	Gingival
GSM261142	Gingival tissue sample 2 from patient 29, Affected site	Patient 29 gingival tissue sample collected as Affected	Diseased (BoP + interproximal PPD of>3 mm + concomitant CAL of>2 mm)	Gingival
GSM261143	Gingival tissue sample 3 from patient 29, Unaffected site	Patient 29 gingival tissue sample collected as Unaffected	Healthy (no BoP + PPD of<5 mm + CAL of<3 2 mm	Gingival
GSM261144	Gingival tissue sample 1 from patient 3, Affected site	Patient 3 gingival tissue sample collected as Affected	Diseased (BoP + interproximal PPD of>3 mm + concomitant CAL of>2 mm)	Gingival
GSM261145	Gingival tissue sample 2 from patient 3, Affected site	Patient 3 gingival tissue sample collected as Affected	Diseased (BoP + interproximal PPD of>3 mm + concomitant CAL of>2 mm)	Gingival
GSM261146	Gingival tissue sample 3 from patient 3, Unaffected site	Patient 3 gingival tissue sample collected as Unaffected	Healthy (no BoP + PPD of<5 mm + CAL of<3 2 mm	Gingival
GSM261147	Gingival tissue sample 1 from patient 30, Affected site	Patient 30 gingival tissue sample collected as Affected	Diseased (BoP + interproximal PPD of>3 mm + concomitant CAL of>2 mm)	Gingival
GSM261148	Gingival tissue sample 2 from patient 30, Affected site	Patient 30 gingival tissue sample collected as Affected	Diseased (BoP + interproximal PPD of>3 mm + concomitant CAL of>2 mm)	Gingival
GSM261149	Gingival tissue sample 1 from patient 31, Affected site	Patient 31 gingival tissue sample collected as Affected	Diseased (BoP + interproximal PPD of>3 mm + concomitant CAL of>2 mm)	Gingival
GSM261150	Gingival tissue sample 2 from patient 31, Affected site	Patient 31 gingival tissue sample collected as Affected	Diseased (BoP + interproximal PPD of>3 mm + concomitant CAL of>2 mm)	Gingival
GSM261151	Gingival tissue sample 3 from patient 31, Unaffected site	Patient 31 gingival tissue sample collected as Unaffected	Healthy (no BoP + PPD of<5 mm + CAL of<3 2 mm	Gingival
GSM261152	Gingival tissue sample 1 from patient 32, Affected site	Patient 32 gingival tissue sample collected as Affected	Diseased (BoP + interproximal PPD of>3 mm + concomitant CAL of>2 mm)	Gingival
GSM261153	Gingival tissue sample 2 from patient 32, Affected site	Patient 32 gingival tissue sample collected as Affected	Diseased (BoP + interproximal PPD of>3 mm + concomitant CAL of>2 mm)	Gingival
GSM261154	Gingival tissue sample 4 from patient 32, Unaffected site	Patient 32 gingival tissue sample collected as Unaffected	Healthy (no BoP + PPD of<5 mm + CAL of<3 2 mm	Gingival
GSM261155	Gingival tissue sample 1 from patient 33, Affected site	Patient 33 gingival tissue sample collected as Affected	Diseased (BoP + interproximal PPD of>3 mm + concomitant CAL of>2 mm)	Gingival
GSM261156	Gingival tissue sample 2 from patient 33, Affected site	Patient 33 gingival tissue sample collected as Affected	Diseased (BoP + interproximal PPD of>3 mm + concomitant CAL of>2 mm)	Gingival
GSM261157	Gingival tissue sample 1 from patient 34, Affected site	Patient 34 gingival tissue sample collected as Affected	Diseased (BoP + interproximal PPD of>3 mm + concomitant CAL of>2 mm)	Gingival
GSM261158	Gingival tissue sample 2 from patient 34, Affected site	Patient 34 gingival tissue sample collected as Affected	Diseased (BoP + interproximal PPD of>3 mm + concomitant CAL of>2 mm)	Gingival
GSM261159	Gingival tissue sample 3 from patient 34, Unaffected site	Patient 34 gingival tissue sample collected as Unaffected	Healthy (no BoP + PPD of<5 mm + CAL of<3 2 mm	Gingival
GSM261160	Gingival tissue sample 1 from patient 35, Affected site	Patient 35 gingival tissue sample collected as Affected	Diseased (BoP + interproximal PPD of>3 mm + concomitant CAL of>2 mm)	Gingival
GSM261161	Gingival tissue sample 2 from patient 35, Affected site	Patient 35 gingival tissue sample collected as Affected	Diseased (BoP + interproximal PPD of>3 mm + concomitant CAL of>2 mm)	Gingival
GSM261162	Gingival tissue sample 4 from patient 35, Unaffected site	Patient 35 gingival tissue sample collected as Unaffected	Healthy (no BoP + PPD of<5 mm + CAL of<3 2 mm	Gingival
GSM261163	Gingival tissue sample 1 from patient 36, Affected site	Patient 36 gingival tissue sample collected as Affected	Diseased (BoP + interproximal PPD of>3 mm + concomitant CAL of>2 mm)	Gingival
GSM261164	Gingival tissue sample 2 from patient 36, Affected site	Patient 36 gingival tissue sample collected as Affected	Diseased (BoP + interproximal PPD of>3 mm + concomitant CAL of>2 mm)	Gingival
GSM261165	Gingival tissue sample 3 from patient 36, Unaffected site	Patient 36 gingival tissue sample collected as Unaffected	Healthy (no BoP + PPD of<5 mm + CAL of<3 2 mm	Gingival
GSM261166	Gingival tissue sample 1 from patient 37, Affected site	Patient 37 gingival tissue sample collected as Affected	Diseased (BoP + interproximal PPD of>3 mm + concomitant CAL of>2 mm)	Gingival
GSM261167	Gingival tissue sample 2 from patient 37, Affected site	Patient 37 gingival tissue sample collected as Affected	Diseased (BoP + interproximal PPD of>3 mm + concomitant CAL of>2 mm)	Gingival
GSM261168	Gingival tissue sample 3 from patient 37, Unaffected site	Patient 37 gingival tissue sample collected as Unaffected	Healthy (no BoP + PPD of<5 mm + CAL of<3 2 mm	Gingival
GSM261169	Gingival tissue sample 1 from patient 38, Affected site	Patient 38 gingival tissue sample collected as Affected	Diseased (BoP + interproximal PPD of>3 mm + concomitant CAL of>2 mm)	Gingival
GSM261170	Gingival tissue sample 2 from patient 38, Affected site	Patient 38 gingival tissue sample collected as Affected	Diseased (BoP + interproximal PPD of>3 mm + concomitant CAL of>2 mm)	Gingival
GSM261171	Gingival tissue sample 3 from patient 38, Unaffected site	Patient 38 gingival tissue sample collected as Unaffected	Healthy (no BoP + PPD of<5 mm + CAL of<3 2 mm	Gingival
GSM261172	Gingival tissue sample 1 from patient 39, Affected site	Patient 39 gingival tissue sample collected as Affected	Diseased (BoP + interproximal PPD of>3 mm + concomitant CAL of>2 mm)	Gingival
GSM261173	Gingival tissue sample 2 from patient 39, Affected site	Patient 39 gingival tissue sample collected as Affected	Diseased (BoP + interproximal PPD of>3 mm + concomitant CAL of>2 mm)	Gingival
GSM261174	Gingival tissue sample 3 from patient 39, Unaffected site	Patient 39 gingival tissue sample collected as Unaffected	Healthy (no BoP + PPD of<5 mm + CAL of<3 2 mm	Gingival
GSM261175	Gingival tissue sample 1 from patient 4, Affected site	Patient 4 gingival tissue sample collected as Affected	Diseased (BoP + interproximal PPD of>3 mm + concomitant CAL of>2 mm)	Gingival
GSM261176	Gingival tissue sample 2 from patient 4, Affected site	Patient 4 gingival tissue sample collected as Affected	Diseased (BoP + interproximal PPD of>3 mm + concomitant CAL of>2 mm)	Gingival
GSM261177	Gingival tissue sample 3 from patient 4, Unaffected site	Patient 4 gingival tissue sample collected as Unaffected	Healthy (no BoP + PPD of<5 mm + CAL of<3 2 mm	Gingival
GSM261178	Gingival tissue sample 1 from patient 40, Affected site	Patient 40 gingival tissue sample collected as Affected	Diseased (BoP + interproximal PPD of>3 mm + concomitant CAL of>2 mm)	Gingival
GSM261179	Gingival tissue sample 2 from patient 40, Affected site	Patient 40 gingival tissue sample collected as Affected	Diseased (BoP + interproximal PPD of>3 mm + concomitant CAL of>2 mm)	Gingival
GSM261180	Gingival tissue sample 1 from patient 41, Affected site	Patient 41 gingival tissue sample collected as Affected	Diseased (BoP + interproximal PPD of>3 mm + concomitant CAL of>2 mm)	Gingival
GSM261181	Gingival tissue sample 2 from patient 41, Affected site	Patient 41 gingival tissue sample collected as Affected	Diseased (BoP + interproximal PPD of>3 mm + concomitant CAL of>2 mm)	Gingival
GSM261182	Gingival tissue sample 1 from patient 42, Affected site	Patient 42 gingival tissue sample collected as Affected	Diseased (BoP + interproximal PPD of>3 mm + concomitant CAL of>2 mm)	Gingival
GSM261183	Gingival tissue sample 2 from patient 42, Affected site	Patient 42 gingival tissue sample collected as Affected	Diseased (BoP + interproximal PPD of>3 mm + concomitant CAL of>2 mm)	Gingival
GSM261184	Gingival tissue sample 3 from patient 42, Unaffected site	Patient 42 gingival tissue sample collected as Unaffected	Healthy (no BoP + PPD of<5 mm + CAL of<3 2 mm	Gingival
GSM261185	Gingival tissue sample 4 from patient 42, Affected site	Patient 42 gingival tissue sample collected as Affected	Diseased (BoP + interproximal PPD of>3 mm + concomitant CAL of>2 mm)	Gingival
GSM261186	Gingival tissue sample 1 from patient 43, Affected site	Patient 43 gingival tissue sample collected as Affected	Diseased (BoP + interproximal PPD of>3 mm + concomitant CAL of>2 mm)	Gingival
GSM261187	Gingival tissue sample 2 from patient 43, Affected site	Patient 43 gingival tissue sample collected as Affected	Diseased (BoP + interproximal PPD of>3 mm + concomitant CAL of>2 mm)	Gingival
GSM261188	Gingival tissue sample 4 from patient 43, Unaffected site	Patient 43 gingival tissue sample collected as Unaffected	Healthy (no BoP + PPD of<5 mm + CAL of<3 2 mm	Gingival
GSM261189	Gingival tissue sample 1 from patient 44, Affected site	Patient 44 gingival tissue sample collected as Affected	Diseased (BoP + interproximal PPD of>3 mm + concomitant CAL of>2 mm)	Gingival
GSM261190	Gingival tissue sample 2 from patient 44, Affected site	Patient 44 gingival tissue sample collected as Affected	Diseased (BoP + interproximal PPD of>3 mm + concomitant CAL of>2 mm)	Gingival
GSM261191	Gingival tissue sample 1 from patient 45, Affected site	Patient 45 gingival tissue sample collected as Affected	Diseased (BoP + interproximal PPD of>3 mm + concomitant CAL of>2 mm)	Gingival
GSM261192	Gingival tissue sample 2 from patient 45, Affected site	Patient 45 gingival tissue sample collected as Affected	Diseased (BoP + interproximal PPD of>3 mm + concomitant CAL of>2 mm)	Gingival
GSM261193	Gingival tissue sample 3 from patient 45, Unaffected site	Patient 45 gingival tissue sample collected as Unaffected	Healthy (no BoP + PPD of<5 mm + CAL of<3 2 mm	Gingival
GSM261194	Gingival tissue sample 1 from patient 46, Affected site	Patient 46 gingival tissue sample collected as Affected	Diseased (BoP + interproximal PPD of>3 mm + concomitant CAL of>2 mm)	Gingival
GSM261195	Gingival tissue sample 2 from patient 46, Affected site	Patient 46 gingival tissue sample collected as Affected	Diseased (BoP + interproximal PPD of>3 mm + concomitant CAL of>2 mm)	Gingival
GSM261196	Gingival tissue sample 3 from patient 46, Unaffected site	Patient 46 gingival tissue sample collected as Unaffected	Healthy (no BoP + PPD of<5 mm + CAL of<3 2 mm	Gingival
GSM261197	Gingival tissue sample 1 from patient 47, Affected site	Patient 47 gingival tissue sample collected as Affected	Diseased (BoP + interproximal PPD of>3 mm + concomitant CAL of>2 mm)	Gingival
GSM261198	Gingival tissue sample 2 from patient 47, Affected site	Patient 47 gingival tissue sample collected as Affected	Diseased (BoP + interproximal PPD of>3 mm + concomitant CAL of>2 mm)	Gingival
GSM261199	Gingival tissue sample 3 from patient 47, Unaffected site	Patient 47 gingival tissue sample collected as Unaffected	Healthy (no BoP + PPD of<5 mm + CAL of<3 2 mm	Gingival
GSM261200	Gingival tissue sample 1 from patient 48, Affected site	Patient 48 gingival tissue sample collected as Affected	Diseased (BoP + interproximal PPD of>3 mm + concomitant CAL of>2 mm)	Gingival
GSM261201	Gingival tissue sample 2 from patient 48, Affected site	Patient 48 gingival tissue sample collected as Affected	Diseased (BoP + interproximal PPD of>3 mm + concomitant CAL of>2 mm)	Gingival
GSM261202	Gingival tissue sample 3 from patient 48, Unaffected site	Patient 48 gingival tissue sample collected as Unaffected	Healthy (no BoP + PPD of<5 mm + CAL of<3 2 mm	Gingival
GSM261203	Gingival tissue sample 1 from patient 49, Affected site	Patient 49 gingival tissue sample collected as Affected	Diseased (BoP + interproximal PPD of>3 mm + concomitant CAL of>2 mm)	Gingival
GSM261204	Gingival tissue sample 2 from patient 49, Affected site	Patient 49 gingival tissue sample collected as Affected	Diseased (BoP + interproximal PPD of>3 mm + concomitant CAL of>2 mm)	Gingival
GSM261205	Gingival tissue sample 3 from patient 49, Unaffected site	Patient 49 gingival tissue sample collected as Unaffected	Healthy (no BoP + PPD of<5 mm + CAL of<3 2 mm	Gingival
GSM261206	Gingival tissue sample 1 from patient 5, Unaffected site	Patient 5 gingival tissue sample collected as Unaffected	Healthy (no BoP + PPD of<5 mm + CAL of<3 2 mm	Gingival
GSM261207	Gingival tissue sample 2 from patient 5, Affected site	Patient 5 gingival tissue sample collected as Affected	Diseased (BoP + interproximal PPD of>3 mm + concomitant CAL of>2 mm)	Gingival
GSM261208	Gingival tissue sample 3 from patient 5, Affected site	Patient 5 gingival tissue sample collected as Affected	Diseased (BoP + interproximal PPD of>3 mm + concomitant CAL of>2 mm)	Gingival
GSM261209	Gingival tissue sample 1 from patient 50, Affected site	Patient 50 gingival tissue sample collected as Affected	Diseased (BoP + interproximal PPD of>3 mm + concomitant CAL of>2 mm)	Gingival
GSM261210	Gingival tissue sample 2 from patient 50, Affected site	Patient 50 gingival tissue sample collected as Affected	Diseased (BoP + interproximal PPD of>3 mm + concomitant CAL of>2 mm)	Gingival
GSM261211	Gingival tissue sample 1 from patient 52, Affected site	Patient 52 gingival tissue sample collected as Affected	Diseased (BoP + interproximal PPD of>3 mm + concomitant CAL of>2 mm)	Gingival
GSM261212	Gingival tissue sample 2 from patient 52, Affected site	Patient 52 gingival tissue sample collected as Affected	Diseased (BoP + interproximal PPD of>3 mm + concomitant CAL of>2 mm)	Gingival
GSM261213	Gingival tissue sample 2 from patient 53, Affected site	Patient 53 gingival tissue sample collected as Affected	Diseased (BoP + interproximal PPD of>3 mm + concomitant CAL of>2 mm)	Gingival
GSM261214	Gingival tissue sample 3 from patient 53, Affected site	Patient 53 gingival tissue sample collected as Affected	Diseased (BoP + interproximal PPD of>3 mm + concomitant CAL of>2 mm)	Gingival
GSM261215	Gingival tissue sample 1 from patient 54, Affected site	Patient 54 gingival tissue sample collected as Affected	Diseased (BoP + interproximal PPD of>3 mm + concomitant CAL of>2 mm)	Gingival
GSM261216	Gingival tissue sample 2 from patient 54, Affected site	Patient 54 gingival tissue sample collected as Affected	Diseased (BoP + interproximal PPD of>3 mm + concomitant CAL of>2 mm)	Gingival
GSM261217	Gingival tissue sample 3 from patient 54, Unaffected site	Patient 54 gingival tissue sample collected as Unaffected	Healthy (no BoP + PPD of<5 mm + CAL of<3 2 mm	Gingival
GSM261218	Gingival tissue sample 1 from patient 55, Affected site	Patient 55 gingival tissue sample collected as Affected	Diseased (BoP + interproximal PPD of>3 mm + concomitant CAL of>2 mm)	Gingival
GSM261219	Gingival tissue sample 2 from patient 55, Affected site	Patient 55 gingival tissue sample collected as Affected	Diseased (BoP + interproximal PPD of>3 mm + concomitant CAL of>2 mm)	Gingival
GSM261220	Gingival tissue sample 3 from patient 55, Unaffected site	Patient 55 gingival tissue sample collected as Unaffected	Healthy (no BoP + PPD of<5 mm + CAL of<3 2 mm	Gingival
GSM261221	Gingival tissue sample 1 from patient 56, Affected site	Patient 56 gingival tissue sample collected as Affected	Diseased (BoP + interproximal PPD of>3 mm + concomitant CAL of>2 mm)	Gingival
GSM261222	Gingival tissue sample 2 from patient 56, Affected site	Patient 56 gingival tissue sample collected as Affected	Diseased (BoP + interproximal PPD of>3 mm + concomitant CAL of>2 mm)	Gingival
GSM261223	Gingival tissue sample 4 from patient 56, Unaffected site	Patient 56 gingival tissue sample collected as Unaffected	Healthy (no BoP + PPD of<5 mm + CAL of<3 2 mm	Gingival
GSM261224	Gingival tissue sample 1 from patient 58, Affected site	Patient 58 gingival tissue sample collected as Affected	Diseased (BoP + interproximal PPD of>3 mm + concomitant CAL of>2 mm)	Gingival
GSM261225	Gingival tissue sample 2 from patient 58, Affected site	Patient 58 gingival tissue sample collected as Affected	Diseased (BoP + interproximal PPD of>3 mm + concomitant CAL of>2 mm)	Gingival
GSM261226	Gingival tissue sample 3 from patient 58, Unaffected site	Patient 58 gingival tissue sample collected as Unaffected	Healthy (no BoP + PPD of<5 mm + CAL of<3 2 mm	Gingival
GSM261227	Gingival tissue sample 1 from patient 59, Affected site	Patient 59 gingival tissue sample collected as Affected	Diseased (BoP + interproximal PPD of>3 mm + concomitant CAL of>2 mm)	Gingival
GSM261228	Gingival tissue sample 2 from patient 59, Affected site	Patient 59 gingival tissue sample collected as Affected	Diseased (BoP + interproximal PPD of>3 mm + concomitant CAL of>2 mm)	Gingival
GSM261229	Gingival tissue sample 4 from patient 59, Unaffected site	Patient 59 gingival tissue sample collected as Unaffected	Healthy (no BoP + PPD of<5 mm + CAL of<3 2 mm	Gingival
GSM261230	Gingival tissue sample 1 from patient 60, Affected site	Patient 60 gingival tissue sample collected as Affected	Diseased (BoP + interproximal PPD of>3 mm + concomitant CAL of>2 mm)	Gingival
GSM261231	Gingival tissue sample 2 from patient 60, Affected site	Patient 60 gingival tissue sample collected as Affected	Diseased (BoP + interproximal PPD of>3 mm + concomitant CAL of>2 mm)	Gingival
GSM261232	Gingival tissue sample 1 from patient 61, Affected site	Patient 61 gingival tissue sample collected as Affected	Diseased (BoP + interproximal PPD of>3 mm + concomitant CAL of>2 mm)	Gingival
GSM261233	Gingival tissue sample 2 from patient 61, Affected site	Patient 61 gingival tissue sample collected as Affected	Diseased (BoP + interproximal PPD of>3 mm + concomitant CAL of>2 mm)	Gingival
GSM261234	Gingival tissue sample 4 from patient 61, Unaffected site	Patient 61 gingival tissue sample collected as Unaffected	Healthy (no BoP + PPD of<5 mm + CAL of<3 2 mm	Gingival
GSM261235	Gingival tissue sample 1 from patient 62, Affected site	Patient 62 gingival tissue sample collected as Affected	Diseased (BoP + interproximal PPD of>3 mm + concomitant CAL of>2 mm)	Gingival
GSM261236	Gingival tissue sample 2 from patient 62, Affected site	Patient 62 gingival tissue sample collected as Affected	Diseased (BoP + interproximal PPD of>3 mm + concomitant CAL of>2 mm)	Gingival
GSM261237	Gingival tissue sample 3 from patient 62, Unaffected site	Patient 62 gingival tissue sample collected as Unaffected	Healthy (no BoP + PPD of<5 mm + CAL of<3 2 mm	Gingival
GSM261238	Gingival tissue sample 1 from patient 63, Affected site	Patient 63 gingival tissue sample collected as Affected	Diseased (BoP + interproximal PPD of>3 mm + concomitant CAL of>2 mm)	Gingival
GSM261239	Gingival tissue sample 2 from patient 63, Affected site	Patient 63 gingival tissue sample collected as Affected	Diseased (BoP + interproximal PPD of>3 mm + concomitant CAL of>2 mm)	Gingival
GSM261240	Gingival tissue sample 3 from patient 63, Unaffected site	Patient 63 gingival tissue sample collected as Unaffected	Healthy (no BoP + PPD of<5 mm + CAL of<3 2 mm	Gingival
GSM261241	Gingival tissue sample 1 from patient 64, Affected site	Patient 64 gingival tissue sample collected as Affected	Diseased (BoP + interproximal PPD of>3 mm + concomitant CAL of>2 mm)	Gingival
GSM261242	Gingival tissue sample 2 from patient 64, Affected site	Patient 64 gingival tissue sample collected as Affected	Diseased (BoP + interproximal PPD of>3 mm + concomitant CAL of>2 mm)	Gingival
GSM261243	Gingival tissue sample 3 from patient 64, Unaffected site	Patient 64 gingival tissue sample collected as Unaffected	Healthy (no BoP + PPD of<5 mm + CAL of<3 2 mm	Gingival
GSM261244	Gingival tissue sample 1 from patient 65, Affected site	Patient 65 gingival tissue sample collected as Affected	Diseased (BoP + interproximal PPD of>3 mm + concomitant CAL of>2 mm)	Gingival
GSM261245	Gingival tissue sample 2 from patient 65, Affected site	Patient 65 gingival tissue sample collected as Affected	Diseased (BoP + interproximal PPD of>3 mm + concomitant CAL of>2 mm)	Gingival
GSM261246	Gingival tissue sample 4 from patient 65, Unaffected site	Patient 65 gingival tissue sample collected as Unaffected	Healthy (no BoP + PPD of<5 mm + CAL of<3 2 mm	Gingival
GSM261247	Gingival tissue sample 1 from patient 66, Affected site	Patient 66 gingival tissue sample collected as Affected	Diseased (BoP + interproximal PPD of>3 mm + concomitant CAL of>2 mm)	Gingival
GSM261248	Gingival tissue sample 2 from patient 66, Affected site	Patient 66 gingival tissue sample collected as Affected	Diseased (BoP + interproximal PPD of>3 mm + concomitant CAL of>2 mm)	Gingival
GSM261249	Gingival tissue sample 3 from patient 66, Unaffected site	Patient 66 gingival tissue sample collected as Unaffected	Healthy (no BoP + PPD of<5 mm + CAL of<3 2 mm	Gingival
GSM261250	Gingival tissue sample 1 from patient 67, Affected site	Patient 67 gingival tissue sample collected as Affected	Diseased (BoP + interproximal PPD of>3 mm + concomitant CAL of>2 mm)	Gingival
GSM261251	Gingival tissue sample 2 from patient 67, Affected site	Patient 67 gingival tissue sample collected as Affected	Diseased (BoP + interproximal PPD of>3 mm + concomitant CAL of>2 mm)	Gingival
GSM261252	Gingival tissue sample 1 from patient 68, Affected site	Patient 68 gingival tissue sample collected as Affected	Diseased (BoP + interproximal PPD of>3 mm + concomitant CAL of>2 mm)	Gingival
GSM261253	Gingival tissue sample 2 from patient 68, Affected site	Patient 68 gingival tissue sample collected as Affected	Diseased (BoP + interproximal PPD of>3 mm + concomitant CAL of>2 mm)	Gingival
GSM261254	Gingival tissue sample 3 from patient 68, Unaffected site	Patient 68 gingival tissue sample collected as Unaffected	Healthy (no BoP + PPD of<5 mm + CAL of<3 2 mm	Gingival
GSM261255	Gingival tissue sample 1 from patient 69, Affected site	Patient 69 gingival tissue sample collected as Affected	Diseased (BoP + interproximal PPD of>3 mm + concomitant CAL of>2 mm)	Gingival
GSM261256	Gingival tissue sample 2 from patient 69, Affected site	Patient 69 gingival tissue sample collected as Affected	Diseased (BoP + interproximal PPD of>3 mm + concomitant CAL of>2 mm)	Gingival
GSM261257	Gingival tissue sample 3 from patient 69, Unaffected site	Patient 69 gingival tissue sample collected as Unaffected	Healthy (no BoP + PPD of<5 mm + CAL of<3 2 mm	Gingival
GSM261258	Gingival tissue sample 1 from patient 7, Affected site	Patient 7 gingival tissue sample collected as Affected	Diseased (BoP + interproximal PPD of>3 mm + concomitant CAL of>2 mm)	Gingival
GSM261259	Gingival tissue sample 2 from patient 7, Affected site	Patient 7 gingival tissue sample collected as Affected	Diseased (BoP + interproximal PPD of>3 mm + concomitant CAL of>2 mm)	Gingival
GSM261260	Gingival tissue sample 3 from patient 7, Affected site	Patient 7 gingival tissue sample collected as Affected	Diseased (BoP + interproximal PPD of>3 mm + concomitant CAL of>2 mm)	Gingival
GSM261261	Gingival tissue sample 1 from patient 70, Affected site	Patient 70 gingival tissue sample collected as Affected	Diseased (BoP + interproximal PPD of>3 mm + concomitant CAL of>2 mm)	Gingival
GSM261262	Gingival tissue sample 2 from patient 70, Affected site	Patient 70 gingival tissue sample collected as Affected	Diseased (BoP + interproximal PPD of>3 mm + concomitant CAL of>2 mm)	Gingival
GSM261263	Gingival tissue sample 1 from patient 71, Affected site	Patient 71 gingival tissue sample collected as Affected	Diseased (BoP + interproximal PPD of>3 mm + concomitant CAL of>2 mm)	Gingival
GSM261264	Gingival tissue sample 2 from patient 71, Affected site	Patient 71 gingival tissue sample collected as Affected	Diseased (BoP + interproximal PPD of>3 mm + concomitant CAL of>2 mm)	Gingival
GSM261265	Gingival tissue sample 1 from patient 72, Affected site	Patient 72 gingival tissue sample collected as Affected	Diseased (BoP + interproximal PPD of>3 mm + concomitant CAL of>2 mm)	Gingival
GSM261266	Gingival tissue sample 2 from patient 72, Unaffected site	Patient 72 gingival tissue sample collected as Unaffected	Healthy (no BoP + PPD of<5 mm + CAL of<3 2 mm	Gingival
GSM261267	Gingival tissue sample 3 from patient 72, Affected site	Patient 72 gingival tissue sample collected as Affected	Diseased (BoP + interproximal PPD of>3 mm + concomitant CAL of>2 mm)	Gingival
GSM261268	Gingival tissue sample 1 from patient 73, Affected site	Patient 73 gingival tissue sample collected as Affected	Diseased (BoP + interproximal PPD of>3 mm + concomitant CAL of>2 mm)	Gingival
GSM261269	Gingival tissue sample 2 from patient 73, Affected site	Patient 73 gingival tissue sample collected as Affected	Diseased (BoP + interproximal PPD of>3 mm + concomitant CAL of>2 mm)	Gingival
GSM261270	Gingival tissue sample 1 from patient 74, Affected site	Patient 74 gingival tissue sample collected as Affected	Diseased (BoP + interproximal PPD of>3 mm + concomitant CAL of>2 mm)	Gingival
GSM261271	Gingival tissue sample 2 from patient 74, Affected site	Patient 74 gingival tissue sample collected as Affected	Diseased (BoP + interproximal PPD of>3 mm + concomitant CAL of>2 mm)	Gingival
GSM261272	Gingival tissue sample 3 from patient 74, Unaffected site	Patient 74 gingival tissue sample collected as Unaffected	Healthy (no BoP + PPD of<5 mm + CAL of<3 2 mm	Gingival
GSM261273	Gingival tissue sample 1 from patient 75, Affected site	Patient 75 gingival tissue sample collected as Affected	Diseased (BoP + interproximal PPD of>3 mm + concomitant CAL of>2 mm)	Gingival
GSM261274	Gingival tissue sample 2 from patient 75, Affected site	Patient 75 gingival tissue sample collected as Affected	Diseased (BoP + interproximal PPD of>3 mm + concomitant CAL of>2 mm)	Gingival
GSM261275	Gingival tissue sample 1 from patient 76, Affected site	Patient 76 gingival tissue sample collected as Affected	Diseased (BoP + interproximal PPD of>3 mm + concomitant CAL of>2 mm)	Gingival
GSM261276	Gingival tissue sample 2 from patient 76, Affected site	Patient 76 gingival tissue sample collected as Affected	Diseased (BoP + interproximal PPD of>3 mm + concomitant CAL of>2 mm)	Gingival
GSM261277	Gingival tissue sample 3 from patient 76, Unaffected site	Patient 76 gingival tissue sample collected as Unaffected	Healthy (no BoP + PPD of<5 mm + CAL of<3 2 mm	Gingival
GSM261278	Gingival tissue sample 1 from patient 77, Affected site	Patient 77 gingival tissue sample collected as Affected	Diseased (BoP + interproximal PPD of>3 mm + concomitant CAL of>2 mm)	Gingival
GSM261279	Gingival tissue sample 2 from patient 77, Affected site	Patient 77 gingival tissue sample collected as Affected	Diseased (BoP + interproximal PPD of>3 mm + concomitant CAL of>2 mm)	Gingival
GSM261280	Gingival tissue sample 3 from patient 77, Unaffected site	Patient 77 gingival tissue sample collected as Unaffected	Healthy (no BoP + PPD of<5 mm + CAL of<3 2 mm	Gingival
GSM261281	Gingival tissue sample 1 from patient 78, Affected site	Patient 78 gingival tissue sample collected as Affected	Diseased (BoP + interproximal PPD of>3 mm + concomitant CAL of>2 mm)	Gingival
GSM261282	Gingival tissue sample 2 from patient 78, Affected site	Patient 78 gingival tissue sample collected as Affected	Diseased (BoP + interproximal PPD of>3 mm + concomitant CAL of>2 mm)	Gingival
GSM261283	Gingival tissue sample 3 from patient 78, Unaffected site	Patient 78 gingival tissue sample collected as Unaffected	Healthy (no BoP + PPD of<5 mm + CAL of<3 2 mm	Gingival
GSM261284	Gingival tissue sample 1 from patient 8, Affected site	Patient 8 gingival tissue sample collected as Affected	Diseased (BoP + interproximal PPD of>3 mm + concomitant CAL of>2 mm)	Gingival
GSM261285	Gingival tissue sample 2 from patient 8, Affected site	Patient 8 gingival tissue sample collected as Affected	Diseased (BoP + interproximal PPD of>3 mm + concomitant CAL of>2 mm)	Gingival
GSM261286	Gingival tissue sample 3 from patient 8, Unaffected site	Patient 8 gingival tissue sample collected as Unaffected	Healthy (no BoP + PPD of<5 mm + CAL of<3 2 mm	Gingival
GSM261287	Gingival tissue sample 1 from patient 80, Affected site	Patient 80 gingival tissue sample collected as Affected	Diseased (BoP + interproximal PPD of>3 mm + concomitant CAL of>2 mm)	Gingival
GSM261288	Gingival tissue sample 2 from patient 80, Affected site	Patient 80 gingival tissue sample collected as Affected	Diseased (BoP + interproximal PPD of>3 mm + concomitant CAL of>2 mm)	Gingival
GSM261289	Gingival tissue sample 1 from patient 81, Affected site	Patient 81 gingival tissue sample collected as Affected	Diseased (BoP + interproximal PPD of>3 mm + concomitant CAL of>2 mm)	Gingival
GSM261290	Gingival tissue sample 2 from patient 81, Affected site	Patient 81 gingival tissue sample collected as Affected	Diseased (BoP + interproximal PPD of>3 mm + concomitant CAL of>2 mm)	Gingival
GSM261291	Gingival tissue sample 1 from patient 82, Affected site	Patient 82 gingival tissue sample collected as Affected	Diseased (BoP + interproximal PPD of>3 mm + concomitant CAL of>2 mm)	Gingival
GSM261292	Gingival tissue sample 2 from patient 82, Affected site	Patient 82 gingival tissue sample collected as Affected	Diseased (BoP + interproximal PPD of>3 mm + concomitant CAL of>2 mm)	Gingival
GSM261293	Gingival tissue sample 3 from patient 82, Unaffected site	Patient 82 gingival tissue sample collected as Unaffected	Healthy (no BoP + PPD of<5 mm + CAL of<3 2 mm	Gingival
GSM261294	Gingival tissue sample 1 from patient 83, Affected site	Patient 83 gingival tissue sample collected as Affected	Diseased (BoP + interproximal PPD of>3 mm + concomitant CAL of>2 mm)	Gingival
GSM261295	Gingival tissue sample 2 from patient 83, Affected site	Patient 83 gingival tissue sample collected as Affected	Diseased (BoP + interproximal PPD of>3 mm + concomitant CAL of>2 mm)	Gingival
GSM261296	Gingival tissue sample 3 from patient 83, Unaffected site	Patient 83 gingival tissue sample collected as Unaffected	Healthy (no BoP + PPD of<5 mm + CAL of<3 2 mm	Gingival
GSM261297	Gingival tissue sample 1 from patient 84, Affected site	Patient 84 gingival tissue sample collected as Affected	Diseased (BoP + interproximal PPD of>3 mm + concomitant CAL of>2 mm)	Gingival
GSM261298	Gingival tissue sample 2 from patient 84, Affected site	Patient 84 gingival tissue sample collected as Affected	Diseased (BoP + interproximal PPD of>3 mm + concomitant CAL of>2 mm)	Gingival
GSM261299	Gingival tissue sample 1 from patient 85, Affected site	Patient 85 gingival tissue sample collected as Affected	Diseased (BoP + interproximal PPD of>3 mm + concomitant CAL of>2 mm)	Gingival
GSM261300	Gingival tissue sample 2 from patient 85, Affected site	Patient 85 gingival tissue sample collected as Affected	Diseased (BoP + interproximal PPD of>3 mm + concomitant CAL of>2 mm)	Gingival
GSM261301	Gingival tissue sample 1 from patient 86, Affected site	Patient 86 gingival tissue sample collected as Affected	Diseased (BoP + interproximal PPD of>3 mm + concomitant CAL of>2 mm)	Gingival
GSM261302	Gingival tissue sample 2 from patient 86, Affected site	Patient 86 gingival tissue sample collected as Affected	Diseased (BoP + interproximal PPD of>3 mm + concomitant CAL of>2 mm)	Gingival
GSM261303	Gingival tissue sample 3 from patient 86, Unaffected site	Patient 86 gingival tissue sample collected as Unaffected	Healthy (no BoP + PPD of<5 mm + CAL of<3 2 mm	Gingival
GSM261304	Gingival tissue sample 1 from patient 87, Affected site	Patient 87 gingival tissue sample collected as Affected	Diseased (BoP + interproximal PPD of>3 mm + concomitant CAL of>2 mm)	Gingival
GSM261305	Gingival tissue sample 2 from patient 87, Affected site	Patient 87 gingival tissue sample collected as Affected	Diseased (BoP + interproximal PPD of>3 mm + concomitant CAL of>2 mm)	Gingival
GSM261306	Gingival tissue sample 3 from patient 87, Unaffected site	Patient 87 gingival tissue sample collected as Unaffected	Healthy (no BoP + PPD of<5 mm + CAL of<3 2 mm	Gingival
GSM261307	Gingival tissue sample 1 from patient 88, Affected site	Patient 88 gingival tissue sample collected as Affected	Diseased (BoP + interproximal PPD of>3 mm + concomitant CAL of>2 mm)	Gingival
GSM261308	Gingival tissue sample 2 from patient 88, Affected site	Patient 88 gingival tissue sample collected as Affected	Diseased (BoP + interproximal PPD of>3 mm + concomitant CAL of>2 mm)	Gingival
GSM261309	Gingival tissue sample 3 from patient 88, Unaffected site	Patient 88 gingival tissue sample collected as Unaffected	Healthy (no BoP + PPD of<5 mm + CAL of<3 2 mm	Gingival
GSM261310	Gingival tissue sample 1 from patient 89, Affected site	Patient 89 gingival tissue sample collected as Affected	Diseased (BoP + interproximal PPD of>3 mm + concomitant CAL of>2 mm)	Gingival
GSM261311	Gingival tissue sample 2 from patient 89, Affected site	Patient 89 gingival tissue sample collected as Affected	Diseased (BoP + interproximal PPD of>3 mm + concomitant CAL of>2 mm)	Gingival
GSM261312	Gingival tissue sample 1 from patient 9, Affected site	Patient 9 gingival tissue sample collected as Affected	Diseased (BoP + interproximal PPD of>3 mm + concomitant CAL of>2 mm)	Gingival
GSM261313	Gingival tissue sample 2 from patient 9, Affected site	Patient 9 gingival tissue sample collected as Affected	Diseased (BoP + interproximal PPD of>3 mm + concomitant CAL of>2 mm)	Gingival
GSM261314	Gingival tissue sample 3 from patient 9, Unaffected site	Patient 9 gingival tissue sample collected as Unaffected	Healthy (no BoP + PPD of<5 mm + CAL of<3 2 mm	Gingival
GSM261315	Gingival tissue sample 1 from patient 90, Affected site	Patient 90 gingival tissue sample collected as Affected	Diseased (BoP + interproximal PPD of>3 mm + concomitant CAL of>2 mm)	Gingival
GSM261316	Gingival tissue sample 2 from patient 90, Affected site	Patient 90 gingival tissue sample collected as Affected	Diseased (BoP + interproximal PPD of>3 mm + concomitant CAL of>2 mm)	Gingival
GSM261317	Gingival tissue sample 3 from patient 90, Unaffected site	Patient 90 gingival tissue sample collected as Unaffected	Healthy (no BoP + PPD of<5 mm + CAL of<3 2 mm	Gingival
GSM261318	Gingival tissue sample 1 from patient 91, Affected site	Patient 91 gingival tissue sample collected as Affected	Diseased (BoP + interproximal PPD of>3 mm + concomitant CAL of>2 mm)	Gingival
GSM261319	Gingival tissue sample 2 from patient 91, Affected site	Patient 91 gingival tissue sample collected as Affected	Diseased (BoP + interproximal PPD of>3 mm + concomitant CAL of>2 mm)	Gingival
GSM261320	Gingival tissue sample 3 from patient 91, Unaffected site	Patient 91 gingival tissue sample collected as Unaffected	Healthy (no BoP + PPD of<5 mm + CAL of<3 2 mm	Gingival
GSM261321	Gingival tissue sample 1 from patient 92, Affected site	Patient 92 gingival tissue sample collected as Affected	Diseased (BoP + interproximal PPD of>3 mm + concomitant CAL of>2 mm)	Gingival
GSM261322	Gingival tissue sample 2 from patient 92, Affected site	Patient 92 gingival tissue sample collected as Affected	Diseased (BoP + interproximal PPD of>3 mm + concomitant CAL of>2 mm)	Gingival
GSM261323	Gingival tissue sample 3 from patient 92, Unaffected site	Patient 92 gingival tissue sample collected as Unaffected	Healthy (no BoP + PPD of<5 mm + CAL of<3 2 mm	Gingival
GSM261324	Gingival tissue sample 1 from patient 93, Affected site	Patient 93 gingival tissue sample collected as Affected	Diseased (BoP + interproximal PPD of>3 mm + concomitant CAL of>2 mm)	Gingival
GSM261325	Gingival tissue sample 2 from patient 93, Affected site	Patient 93 gingival tissue sample collected as Affected	Diseased (BoP + interproximal PPD of>3 mm + concomitant CAL of>2 mm)	Gingival
GSM261326	Gingival tissue sample 3 from patient 93, Unaffected site	Patient 93 gingival tissue sample collected as Unaffected	Healthy (no BoP + PPD of<5 mm + CAL of<3 2 mm	Gingival
GSM261327	Gingival tissue sample 1 from patient 94, Affected site	Patient 94 gingival tissue sample collected as Affected	Diseased (BoP + interproximal PPD of>3 mm + concomitant CAL of>2 mm)	Gingival
GSM261328	Gingival tissue sample 2 from patient 94, Affected site	Patient 94 gingival tissue sample collected as Affected	Diseased (BoP + interproximal PPD of>3 mm + concomitant CAL of>2 mm)	Gingival
GSM261329	Gingival tissue sample 3 from patient 94, Unaffected site	Patient 94 gingival tissue sample collected as Unaffected	Healthy (no BoP + PPD of<5 mm + CAL of<3 2 mm	Gingival
GSM261330	Gingival tissue sample 1 from patient 95, Affected site	Patient 95 gingival tissue sample collected as Affected	Diseased (BoP + interproximal PPD of>3 mm + concomitant CAL of>2 mm)	Gingival
GSM261331	Gingival tissue sample 2 from patient 95, Affected site	Patient 95 gingival tissue sample collected as Affected	Diseased (BoP + interproximal PPD of>3 mm + concomitant CAL of>2 mm)	Gingival
GSM261332	Gingival tissue sample 3 from patient 95, Unaffected site	Patient 95 gingival tissue sample collected as Unaffected	Healthy (no BoP + PPD of<5 mm + CAL of<3 2 mm	Gingival

## Sheet: PD-GSE106090
!Sample_geo_accession	!Sample_title	!Sample_source_name_ch1	subject status	gender	age	tissue	tooth site
GSM2829425	Tissue_Periodontitis_Patient1_rep1	Inflamed periodontal tissue	periodontitis patient	male	42y	Inflamed periodontal tissue	#13
GSM2829426	Tissue_Periodontitis_Patient2_rep1	Inflamed periodontal tissue	periodontitis patient	male	63y	Inflamed periodontal tissue	#44
GSM2829427	Tissue_Periodontitis_Patient3_rep1	Inflamed periodontal tissue	periodontitis patient	male	50y	Inflamed periodontal tissue	#12
GSM2829428	Tissue_Periodontitis_Patient4_rep1	Inflamed periodontal tissue	periodontitis patient	female	53y	Inflamed periodontal tissue	#42
GSM2829429	Tissue_Periodontitis_Patient5_rep1	Inflamed periodontal tissue	periodontitis patient	female	45y	Inflamed periodontal tissue	#46
GSM2829430	Tissue_Periodontitis_Patient6_rep1	Inflamed periodontal tissue	periodontitis patient	female	31y	Inflamed periodontal tissue	#36
GSM2829431	Tissue_Healthy control1_rep1	Healthy periodontal tissue	healthy individual	male	31y	Healthy periodontal tissue	#17
GSM2829432	Tissue_Healthy control2_rep1	Healthy periodontal tissue	healthy individual	male	33y	Healthy periodontal tissue	#36
GSM2829433	Tissue_Healthy control3_rep1	Healthy periodontal tissue	healthy individual	male	46y	Healthy periodontal tissue	#27
GSM2829434	Tissue_Healthy control4_rep1	Healthy periodontal tissue	healthy individual	female	28y	Healthy periodontal tissue	#38
GSM2829435	Tissue_Healthy control5_rep1	Healthy periodontal tissue	healthy individual	female	38y	Healthy periodontal tissue	#38
GSM2829436	Tissue_Healthy control6_rep1	Healthy periodontal tissue	healthy individual	male	23y	Healthy periodontal tissue	#48
